# Supplementary material for: Nuclear fascin regulates cancer cell survival
Source: eLife. 2022 Aug 30;11:e79283. doi: 10.7554/eLife.79283 (PMC9427113; doi:10.7554/eLife.79283)
Supplement: Figure 2—source data 2. — Peptide counts per identified protein shown for each protein/sample. Nuclear fascin (Nb2-NLS) enriched samples shown in tab 1. Full dataset shown in tab 2. Proteomics reporting details shown in tab 3. [file elife-79283-fig2-data2.xlsx]

## Sheet: Nuclear fascin enriched
				Total unique peptide count					Additional protein taxonomy
Identified Proteins	Accession Number	Alternate ID	Molecular Weight	NES-Nb2 -1	NLS-Nb2-1	NES-Nb2-2	NLS-Nb2-2		Taxonomy	cell adhesion	regulation of body fluid levels	single organismal cell-cell adhesion	single-organism cellular localization	single-organism intracellular transport	cytoplasmic region	cytoplasmic ribonucleoprotein granule	cytoskeleton	histone acetyltransferase complex	intracellular non-membrane-bounded organelle	microtubule	microtubule cytoskeleton	microtubule end	non-membrane-bounded organelle	polymeric cytoskeletal fiber	supramolecular fiber	supramolecular polymer	cytoskeletal protein binding	structural constituent of synapse	structural molecule activity
Cluster of Actin, cytoplasmic 1 OS=Homo sapiens OX=9606 GN=ACTB PE=1 SV=1 (ACTB_HUMAN)	ACTB_HUMAN [2]	ACTB	42 kDa	12	6	12	8		Homo sapiens	platelet aggregation	platelet aggregation	platelet aggregation	synaptic vesicle endocytosis	synaptic vesicle endocytosis	cortical cytoskeleton	cytoplasmic ribonucleoprotein granule	actin cytoskeleton, actin filament, cortical cytoskeleton, myosin filament, postsynaptic actin cytoskeleton	NuA4 histone acetyltransferase complex	actin cytoskeleton, actin filament, cortical cytoskeleton, cytoplasmic ribonucleoprotein granule, myosin filament, nuclear chromatin, postsynaptic actin cytoskeleton				actin cytoskeleton, actin filament, cortical cytoskeleton, cytoplasmic ribonucleoprotein granule, myosin filament, nuclear chromatin, postsynaptic actin cytoskeleton	actin filament	actin filament	actin filament	kinesin binding, tau protein binding	structural constituent of postsynaptic actin cytoskeleton	structural constituent of cytoskeleton, structural constituent of postsynaptic actin cytoskeleton
Histone H3.1t OS=Homo sapiens OX=9606 GN=HIST3H3 PE=1 SV=3	H31T_HUMAN (+3)	HIST3H3	16 kDa	0	6	0	7		Homo sapiens										nuclear chromosome, telomeric region, nuclear nucleosome				nuclear chromosome, telomeric region, nuclear nucleosome
Uncharacterized protein DKFZp434B061 OS=Homo sapiens OX=9606 PE=2 SV=2	YM012_HUMAN		59 kDa	0	5	0	2		Homo sapiens
Histone H4 OS=Homo sapiens OX=9606 GN=HIST1H4A PE=1 SV=2	H4_HUMAN	HIST1H4A	11 kDa	0	4	0	2		Homo sapiens										nuclear chromosome, nuclear chromosome, telomeric region, nuclear nucleosome				nuclear chromosome, nuclear chromosome, telomeric region, nuclear nucleosome
Proliferation marker protein Ki-67 OS=Homo sapiens OX=9606 GN=MKI67 PE=1 SV=2	KI67_HUMAN	MKI67	359 kDa	0	4	0	4		Homo sapiens										chromosome, nucleolus				chromosome, nucleolus
CSC1-like protein 2 OS=Homo sapiens OX=9606 GN=TMEM63B PE=1 SV=1	CSCL2_HUMAN	TMEM63B	95 kDa	0	4	0	2		Homo sapiens								actin cytoskeleton		actin cytoskeleton				actin cytoskeleton
Sex comb on midleg-like protein 2 OS=Homo sapiens OX=9606 GN=SCML2 PE=1 SV=1	SCML2_HUMAN	SCML2	77 kDa	0	3	0	3		Homo sapiens
Elongation factor 1-alpha 1 OS=Homo sapiens OX=9606 GN=EEF1A1 PE=1 SV=1	EF1A1_HUMAN (+1)	EEF1A1	50 kDa	0	3	0	6		Homo sapiens						cortical actin cytoskeleton		cortical actin cytoskeleton		cortical actin cytoskeleton, nucleolus				cortical actin cytoskeleton, nucleolus
Synaptopodin 2-like protein OS=Homo sapiens OX=9606 GN=SYNPO2L PE=2 SV=3	SYP2L_HUMAN	SYNPO2L	102 kDa	0	3	0	4		Homo sapiens								actin cytoskeleton		Z disc, actin cytoskeleton				Z disc, actin cytoskeleton		Z disc	Z disc	actin binding
Serine/threonine-protein kinase ATR OS=Homo sapiens OX=9606 GN=ATR PE=1 SV=3	ATR_HUMAN	ATR	301 kDa	0	3	1	3		Homo sapiens										chromosome				chromosome
DNA repair protein RAD50 OS=Homo sapiens OX=9606 GN=RAD50 PE=1 SV=1	RAD50_HUMAN	RAD50	154 kDa	0	3	0	4		Homo sapiens										condensed nuclear chromosome, nuclear chromatin, nuclear chromosome, telomeric region, site of double-strand break				condensed nuclear chromosome, nuclear chromatin, nuclear chromosome, telomeric region, site of double-strand break
DNA polymerase zeta catalytic subunit OS=Homo sapiens OX=9606 GN=REV3L PE=1 SV=2	REV3L_HUMAN	REV3L	353 kDa	0	3	0	4		Homo sapiens										nucleolus				nucleolus
Tripartite motif-containing protein 72 OS=Homo sapiens OX=9606 GN=TRIM72 PE=1 SV=2	TRI72_HUMAN	TRIM72	53 kDa	0	1	0	0		Homo sapiens
DNA cross-link repair 1A protein OS=Homo sapiens OX=9606 GN=DCLRE1A PE=1 SV=3	DCR1A_HUMAN	DCLRE1A	116 kDa	0	1	0	0		Homo sapiens										fibrillar center, nuclear chromosome, telomeric region				fibrillar center, nuclear chromosome, telomeric region
Coiled-coil domain-containing protein 168 OS=Homo sapiens OX=9606 GN=CCDC168 PE=2 SV=2	CC168_HUMAN	CCDC168	278 kDa	0	1	1	1		Homo sapiens
Zinc finger homeobox protein 4 OS=Homo sapiens OX=9606 GN=ZFHX4 PE=1 SV=1	ZFHX4_HUMAN	ZFHX4	394 kDa	0	1	0	2		Homo sapiens
R3H domain-containing protein 1 OS=Homo sapiens OX=9606 GN=R3HDM1 PE=1 SV=3	R3HD1_HUMAN	R3HDM1	121 kDa	0	1	0	1		Homo sapiens

## Sheet: Full dataset
					Number of unique peptides
Identified Proteins	Accession Number	Alternate ID	Molecular Weight		NES-Nb2 -1	NLS-Nb2-1	NES-Nb2-2	NLS-Nb2-2	cell adhesion	regulation of body fluid levels	single organismal cell-cell adhesion	single-organism cellular localization	single-organism intracellular transport	cytoplasmic region	cytoplasmic ribonucleoprotein granule	cytoskeleton	histone acetyltransferase complex	intracellular non-membrane-bounded organelle	microtubule	microtubule cytoskeleton	microtubule end	non-membrane-bounded organelle	polymeric cytoskeletal fiber	supramolecular fiber	supramolecular polymer	cytoskeletal protein binding	structural constituent of synapse	structural molecule activity
DNA-3-methyladenine glycosylase OS=Homo sapiens OX=9606 GN=MPG PE=1 SV=3	3MG_HUMAN	MPG	33 kDa		2	0	0	1										mitochondrial nucleoid				mitochondrial nucleoid
5-hydroxytryptamine receptor 1D OS=Homo sapiens OX=9606 GN=HTR1D PE=1 SV=1	5HT1D_HUMAN	HTR1D	42 kDa		1	0	1	0
Cluster of Actin, cytoplasmic 1 OS=Homo sapiens OX=9606 GN=ACTB PE=1 SV=1 (ACTB_HUMAN)	ACTB_HUMAN [2]	ACTB	42 kDa		12	6	12	8	platelet aggregation	platelet aggregation	platelet aggregation	synaptic vesicle endocytosis	synaptic vesicle endocytosis	cell cortex, cortical cytoskeleton	cytoplasmic ribonucleoprotein granule	actin cytoskeleton, actin filament, cortical cytoskeleton, cytoskeleton, myosin filament, postsynaptic actin cytoskeleton	NuA4 histone acetyltransferase complex	actin cytoskeleton, actin filament, cortical cytoskeleton, cytoplasmic ribonucleoprotein granule, cytoskeleton, myosin filament, nuclear chromatin, postsynaptic actin cytoskeleton				actin cytoskeleton, actin filament, cortical cytoskeleton, cytoplasmic ribonucleoprotein granule, cytoskeleton, myosin filament, nuclear chromatin, postsynaptic actin cytoskeleton	actin filament	actin filament	actin filament	kinesin binding, tau protein binding	structural constituent of postsynaptic actin cytoskeleton	structural constituent of cytoskeleton, structural constituent of postsynaptic actin cytoskeleton
Actin, cytoplasmic 1 OS=Homo sapiens OX=9606 GN=ACTB PE=1 SV=1	ACTB_HUMAN (+1)	ACTB	42 kDa		8	5	7	6	platelet aggregation	platelet aggregation	platelet aggregation	synaptic vesicle endocytosis	synaptic vesicle endocytosis	cortical cytoskeleton	cytoplasmic ribonucleoprotein granule	cortical cytoskeleton, cytoskeleton, postsynaptic actin cytoskeleton	NuA4 histone acetyltransferase complex	cortical cytoskeleton, cytoplasmic ribonucleoprotein granule, cytoskeleton, nuclear chromatin, postsynaptic actin cytoskeleton				cortical cytoskeleton, cytoplasmic ribonucleoprotein granule, cytoskeleton, nuclear chromatin, postsynaptic actin cytoskeleton				kinesin binding, tau protein binding	structural constituent of postsynaptic actin cytoskeleton	structural constituent of cytoskeleton, structural constituent of postsynaptic actin cytoskeleton
Androglobin OS=Homo sapiens OX=9606 GN=ADGB PE=2 SV=3	ADGB_HUMAN	ADGB	190 kDa		3	1	1	0
Agrin OS=Homo sapiens OX=9606 GN=AGRN PE=1 SV=5	AGRIN_HUMAN	AGRN	217 kDa		2	0	2	0																				extracellular matrix structural constituent, structural constituent of cytoskeleton
Protein AHNAK2 OS=Homo sapiens OX=9606 GN=AHNAK2 PE=1 SV=2	AHNK2_HUMAN	AHNAK2	617 kDa		2	0	1	0										Z disc, costamere				Z disc, costamere		Z disc, costamere	Z disc, costamere
Serum albumin OS=Homo sapiens OX=9606 GN=ALB PE=1 SV=2	ALBU_HUMAN	ALB	69 kDa		1	0	3	0				maintenance of mitochondrion location
Angiomotin OS=Homo sapiens OX=9606 GN=AMOT PE=1 SV=1	AMOT_HUMAN	AMOT	118 kDa		0	0	0	0								actin filament, stress fiber		actin filament, stress fiber				actin filament, stress fiber	actin filament	actin filament	actin filament
Ankyrin repeat domain-containing protein 24 OS=Homo sapiens OX=9606 GN=ANKRD24 PE=2 SV=2	ANR24_HUMAN	ANKRD24	124 kDa		0	0	2	1
Apoptotic protease-activating factor 1 OS=Homo sapiens OX=9606 GN=APAF1 PE=1 SV=2	APAF_HUMAN	APAF1	142 kDa		0	1	0	0
Apolipoprotein B-100 OS=Homo sapiens OX=9606 GN=APOB PE=1 SV=2	APOB_HUMAN	APOB	516 kDa		2	1	2	1
Rho guanine nucleotide exchange factor 12 OS=Homo sapiens OX=9606 GN=ARHGEF12 PE=1 SV=1	ARHGC_HUMAN	ARHGEF12	173 kDa		1	2	0	0
Homeobox protein ARX OS=Homo sapiens OX=9606 GN=ARX PE=1 SV=1	ARX_HUMAN	ARX	58 kDa		1	0	2	0
Abnormal spindle-like microcephaly-associated protein OS=Homo sapiens OX=9606 GN=ASPM PE=1 SV=2	ASPM_HUMAN	ASPM	410 kDa		3	3	1	2				maintenance of centrosome location				centrosome, meiotic spindle, microtubule minus-end, mitotic spindle pole		centrosome, meiotic spindle, microtubule minus-end, mitotic spindle pole	microtubule minus-end	centrosome, meiotic spindle, microtubule minus-end, mitotic spindle pole	microtubule minus-end	centrosome, meiotic spindle, microtubule minus-end, mitotic spindle pole	microtubule minus-end	microtubule minus-end	microtubule minus-end
Phospholipid-transporting ATPase IA OS=Homo sapiens OX=9606 GN=ATP8A1 PE=1 SV=1	AT8A1_HUMAN	ATP8A1	131 kDa		0	1	0	0
Serine/threonine-protein kinase ATR OS=Homo sapiens OX=9606 GN=ATR PE=1 SV=3	ATR_HUMAN	ATR	301 kDa		0	3	1	3										chromosome				chromosome
A disintegrin and metalloproteinase with thrombospondin motifs 5 OS=Homo sapiens OX=9606 GN=ADAMTS5 PE=1 SV=2	ATS5_HUMAN	ADAMTS5	102 kDa		0	0	1	1
BTB/POZ domain-containing adapter for CUL3-mediated RhoA degradation protein 3 OS=Homo sapiens OX=9606 GN=KCTD10 PE=1 SV=1	BACD3_HUMAN	KCTD10	35 kDa		1	0	1	0
Bcl-2-associated transcription factor 1 OS=Homo sapiens OX=9606 GN=BCLAF1 PE=1 SV=2	BCLF1_HUMAN	BCLAF1	106 kDa		4	1	1	1
BRD4-interacting chromatin-remodeling complex-associated protein-like OS=Homo sapiens OX=9606 GN=BICRAL PE=1 SV=2	BICRL_HUMAN	BICRAL	115 kDa		0	0	1	0
Brefeldin A-inhibited guanine nucleotide-exchange protein 3 OS=Homo sapiens OX=9606 GN=ARFGEF3 PE=1 SV=3	BIG3_HUMAN	ARFGEF3	241 kDa		2	0	0	0
Cluster of Endoplasmic reticulum chaperone BiP OS=Homo sapiens OX=9606 GN=HSPA5 PE=1 SV=2 (BIP_HUMAN)	BIP_HUMAN	HSPA5	72 kDa		1	1	2	1				slow axonal transport	slow axonal transport					nucleolus				nucleolus
Heat shock cognate 71 kDa protein OS=Homo sapiens OX=9606 GN=HSPA8 PE=1 SV=1	HSP7C_HUMAN	HSPA8	71 kDa		1	0	1	0				slow axonal transport	slow axonal transport					nucleolus				nucleolus
Breast cancer type 2 susceptibility protein OS=Homo sapiens OX=9606 GN=BRCA2 PE=1 SV=3	BRCA2_HUMAN	BRCA2	384 kDa		2	0	0	1								centrosome		centrosome, lateral element, nuclear chromosome, telomeric region		centrosome		centrosome, lateral element, nuclear chromosome, telomeric region				gamma-tubulin binding
TATA-binding protein-associated factor 172 OS=Homo sapiens OX=9606 GN=BTAF1 PE=1 SV=2	BTAF1_HUMAN	BTAF1	207 kDa		1	1	0	0
Cadherin-9 OS=Homo sapiens OX=9606 GN=CDH9 PE=2 SV=2	CADH9_HUMAN	CDH9	89 kDa		1	0	2	1	calcium-dependent cell-cell adhesion via plasma membrane cell adhesion molecules, cell-cell adhesion mediated by cadherin, homophilic cell adhesion via plasma membrane adhesion molecules, synaptic membrane adhesion		cell-cell adhesion mediated by cadherin															cytoskeletal protein binding
Capping protein, Arp2/3 and myosin-I linker protein 2 OS=Homo sapiens OX=9606 GN=CARMIL2 PE=1 SV=2	CARL2_HUMAN	CARMIL2	155 kDa		1	0	0	0								actin cytoskeleton, intermediate filament cytoskeleton		actin cytoskeleton, intermediate filament cytoskeleton				actin cytoskeleton, intermediate filament cytoskeleton
Cytosolic carboxypeptidase 4 OS=Homo sapiens OX=9606 GN=AGBL1 PE=1 SV=2	CBPC4_HUMAN	AGBL1	120 kDa		1	1	1	1																		tubulin binding
Coiled-coil domain-containing protein 168 OS=Homo sapiens OX=9606 GN=CCDC168 PE=2 SV=2	CC168_HUMAN	CCDC168	278 kDa		0	1	1	1
Collagen and calcium-binding EGF domain-containing protein 1 OS=Homo sapiens OX=9606 GN=CCBE1 PE=1 SV=1	CCBE1_HUMAN	CCBE1	44 kDa		2	0	2	0
Coiled-coil domain-containing protein 13 OS=Homo sapiens OX=9606 GN=CCDC13 PE=1 SV=2	CCD13_HUMAN	CCDC13	81 kDa		1	0	0	1								centriolar satellite, centrosome		centriolar satellite, centrosome		centriolar satellite, centrosome		centriolar satellite, centrosome
Centromere protein C OS=Homo sapiens OX=9606 GN=CENPC PE=1 SV=2	CENPC_HUMAN	CENPC	107 kDa		2	0	0	0										condensed nuclear chromosome kinetochore, condensed nuclear chromosome, centromeric region, nuclear pericentric heterochromatin, pericentric heterochromatin				condensed nuclear chromosome kinetochore, condensed nuclear chromosome, centromeric region, nuclear pericentric heterochromatin, pericentric heterochromatin
Centromere-associated protein E OS=Homo sapiens OX=9606 GN=CENPE PE=1 SV=2	CENPE_HUMAN	CENPE	316 kDa		2	0	1	2				mitotic chromosome movement towards spindle pole				kinesin complex, kinetochore microtubule, microtubule cytoskeleton, mitotic spindle midzone		condensed chromosome kinetochore, condensed chromosome, centromeric region, kinesin complex, kinetochore, kinetochore microtubule, microtubule cytoskeleton, mitotic spindle midzone	kinetochore microtubule	kinesin complex, kinetochore microtubule, microtubule cytoskeleton, mitotic spindle midzone		condensed chromosome kinetochore, condensed chromosome, centromeric region, kinesin complex, kinetochore, kinetochore microtubule, microtubule cytoskeleton, mitotic spindle midzone	kinetochore microtubule	kinetochore microtubule	kinetochore microtubule	microtubule binding
Coiled-coil-helix-coiled-coil-helix domain-containing protein 5 OS=Homo sapiens OX=9606 GN=CHCHD5 PE=1 SV=1	CHCH5_HUMAN	CHCHD5	12 kDa		1	0	1	0
Chromodomain-helicase-DNA-binding protein 5 OS=Homo sapiens OX=9606 GN=CHD5 PE=1 SV=1	CHD5_HUMAN	CHD5	223 kDa		2	0	2	0										heterochromatin				heterochromatin
Chondroitin sulfate synthase 1 OS=Homo sapiens OX=9606 GN=CHSY1 PE=1 SV=3	CHSS1_HUMAN	CHSY1	92 kDa		0	0	0	0
Carbohydrate sulfotransferase 5 OS=Homo sapiens OX=9606 GN=CHST5 PE=2 SV=3	CHST5_HUMAN	CHST5	46 kDa		0	1	1	1
Condensin complex subunit 2 OS=Homo sapiens OX=9606 GN=NCAPH PE=1 SV=3	CND2_HUMAN	NCAPH	83 kDa		1	0	0	0										condensin complex, nuclear condensin complex				condensin complex, nuclear condensin complex
Collagen alpha-6(IV) chain OS=Homo sapiens OX=9606 GN=COL4A6 PE=1 SV=3	CO4A6_HUMAN	COL4A6	164 kDa		2	0	1	1	cell adhesion																collagen type IV trimer			extracellular matrix structural constituent conferring tensile strength
Collagen alpha-1(XVII) chain OS=Homo sapiens OX=9606 GN=COL17A1 PE=1 SV=3	COHA1_HUMAN	COL17A1	150 kDa		2	1	1	1	cell-matrix adhesion																			extracellular matrix structural constituent, extracellular matrix structural constituent conferring tensile strength
CSC1-like protein 2 OS=Homo sapiens OX=9606 GN=TMEM63B PE=1 SV=1	CSCL2_HUMAN	TMEM63B	95 kDa		0	4	0	2								actin cytoskeleton		actin cytoskeleton				actin cytoskeleton
Catenin alpha-2 OS=Homo sapiens OX=9606 GN=CTNNA2 PE=1 SV=5	CTNA2_HUMAN	CTNNA2	105 kDa		4	0	1	0	cell-cell adhesion					presynaptic active zone cytoplasmic component		actin cytoskeleton		actin cytoskeleton				actin cytoskeleton, postsynaptic density, intracellular component				actin filament binding		structural constituent of cytoskeleton
Catenin delta-1 OS=Homo sapiens OX=9606 GN=CTNND1 PE=1 SV=1	CTND1_HUMAN	CTNND1	108 kDa		2	0	0	1	cell adhesion, cell-cell adhesion					presynaptic active zone cytoplasmic component								postsynaptic density, intracellular component
Alpha-catulin OS=Homo sapiens OX=9606 GN=CTNNAL1 PE=1 SV=2	CTNL1_HUMAN	CTNNAL1	82 kDa		0	0	1	0	cell adhesion							cytoskeleton		cytoskeleton				cytoskeleton				actin filament binding
Dermcidin OS=Homo sapiens OX=9606 GN=DCD PE=1 SV=2	DCD_HUMAN	DCD	11 kDa		0	1	1	0
DNA cross-link repair 1A protein OS=Homo sapiens OX=9606 GN=DCLRE1A PE=1 SV=3	DCR1A_HUMAN	DCLRE1A	116 kDa		0	1	0	0										fibrillar center, nuclear chromosome, telomeric region				fibrillar center, nuclear chromosome, telomeric region
Probable ATP-dependent RNA helicase DDX60-like OS=Homo sapiens OX=9606 GN=DDX60L PE=2 SV=2	DDX6L_HUMAN	DDX60L	198 kDa		1	0	1	0
Probable ATP-dependent RNA helicase DDX27 OS=Homo sapiens OX=9606 GN=DDX27 PE=1 SV=2	DDX27_HUMAN	DDX27	90 kDa		0	1	0	2										chromosome, nucleolus				chromosome, nucleolus
Sphingolipid delta(4)-desaturase/C4-monooxygenase DES2 OS=Homo sapiens OX=9606 GN=DEGS2 PE=1 SV=2	DEGS2_HUMAN	DEGS2	37 kDa		1	0	1	0
DEP domain-containing protein 7 OS=Homo sapiens OX=9606 GN=DEPDC7 PE=2 SV=1	DEPD7_HUMAN	DEPDC7	58 kDa		1	0	1	1
Pre-mRNA-splicing factor ATP-dependent RNA helicase DHX15 OS=Homo sapiens OX=9606 GN=DHX15 PE=1 SV=2	DHX15_HUMAN	DHX15	91 kDa		1	1	1	0										nucleolus				nucleolus
Pre-mRNA-splicing factor ATP-dependent RNA helicase DHX16 OS=Homo sapiens OX=9606 GN=DHX16 PE=1 SV=2	DHX16_HUMAN	DHX16	119 kDa		0	0	0	2
Disks large-associated protein 4 OS=Homo sapiens OX=9606 GN=DLGAP4 PE=1 SV=3	DLGP4_HUMAN	DLGAP4	108 kDa		1	0	0	0
Doublesex- and mab-3-related transcription factor C2 OS=Homo sapiens OX=9606 GN=DMRTC2 PE=2 SV=2	DMRTD_HUMAN	DMRTC2	39 kDa		3	0	1	0										XY body				XY body
Dynein heavy chain domain-containing protein 1 OS=Homo sapiens OX=9606 GN=DNHD1 PE=2 SV=2	DNHD1_HUMAN	DNHD1	534 kDa		2	0	3	0								dynein complex		dynein complex		dynein complex		dynein complex
Double-stranded RNA-specific adenosine deaminase OS=Homo sapiens OX=9606 GN=ADAR PE=1 SV=4	DSRAD_HUMAN	ADAR	136 kDa		2	0	0	0				protein import into nucleus	protein import into nucleus					nucleolus				nucleolus
Segment polarity protein dishevelled homolog DVL-2 OS=Homo sapiens OX=9606 GN=DVL2 PE=1 SV=1	DVL2_HUMAN	DVL2	79 kDa		2	1	1	0
Dynein heavy chain 2, axonemal OS=Homo sapiens OX=9606 GN=DNAH2 PE=2 SV=3	DYH2_HUMAN	DNAH2	508 kDa		0	2	2	1								axonemal dynein complex, axoneme, dynein complex, microtubule		axonemal dynein complex, axoneme, dynein complex, microtubule	microtubule	axonemal dynein complex, dynein complex, microtubule		axonemal dynein complex, axoneme, dynein complex, microtubule	microtubule	microtubule	microtubule
Dynein heavy chain 5, axonemal OS=Homo sapiens OX=9606 GN=DNAH5 PE=1 SV=3	DYH5_HUMAN	DNAH5	529 kDa		0	0	1	0								axoneme, dynein complex, microtubule, outer dynein arm		axoneme, dynein complex, microtubule, outer dynein arm	microtubule	dynein complex, microtubule, outer dynein arm		axoneme, dynein complex, microtubule, outer dynein arm	microtubule	microtubule	microtubule
Dynein heavy chain 10, axonemal OS=Homo sapiens OX=9606 GN=DNAH10 PE=1 SV=4	DYH10_HUMAN	DNAH10	515 kDa		0	2	1	2								axoneme, dynein complex, microtubule		axoneme, dynein complex, microtubule	microtubule	dynein complex, microtubule		axoneme, dynein complex, microtubule	microtubule	microtubule	microtubule
Cytoplasmic dynein 1 heavy chain 1 OS=Homo sapiens OX=9606 GN=DYNC1H1 PE=1 SV=5	DYHC1_HUMAN	DYNC1H1	532 kDa		1	0	1	1				minus-end-directed vesicle transport along microtubule, retrograde axonal transport	minus-end-directed vesicle transport along microtubule, retrograde axonal transport	axon cytoplasm, cell cortex		centrosome, cytoplasmic dynein complex, cytoplasmic microtubule		centrosome, cytoplasmic dynein complex, cytoplasmic microtubule	cytoplasmic microtubule	centrosome, cytoplasmic dynein complex, cytoplasmic microtubule		centrosome, cytoplasmic dynein complex, cytoplasmic microtubule	cytoplasmic microtubule	cytoplasmic microtubule	cytoplasmic microtubule
Dystonin OS=Homo sapiens OX=9606 GN=DST PE=1 SV=4	DYST_HUMAN	DST	861 kDa		1	2	4	3	cell adhesion			retrograde axonal transport	retrograde axonal transport	axon cytoplasm, cell cortex		actin cytoskeleton, intermediate filament, intermediate filament cytoskeleton, microtubule cytoskeleton, microtubule plus-end		H zone, Z disc, actin cytoskeleton, intermediate filament, intermediate filament cytoskeleton, microtubule cytoskeleton, microtubule plus-end	microtubule plus-end	microtubule cytoskeleton, microtubule plus-end	microtubule plus-end	H zone, Z disc, actin cytoskeleton, intermediate filament, intermediate filament cytoskeleton, microtubule cytoskeleton, microtubule plus-end	intermediate filament, microtubule plus-end	H zone, Z disc, intermediate filament, microtubule plus-end	H zone, Z disc, intermediate filament, microtubule plus-end	actin binding, microtubule plus-end binding		structural molecule activity
Zinc finger protein DZIP1 OS=Homo sapiens OX=9606 GN=DZIP1 PE=1 SV=1	DZIP1_HUMAN	DZIP1	99 kDa		2	0	0	1								centriole, ciliary basal body		centriole, ciliary basal body		centriole, ciliary basal body		centriole, ciliary basal body
Eukaryotic translation initiation factor 2-alpha kinase 3 OS=Homo sapiens OX=9606 GN=EIF2AK3 PE=1 SV=3	E2AK3_HUMAN	EIF2AK3	125 kDa		0	0	1	2										cytosolic ribosome				cytosolic ribosome
Erythroid differentiation-related factor 1 OS=Homo sapiens OX=9606 GN=EDRF1 PE=1 SV=1	EDRF1_HUMAN	EDRF1	139 kDa		0	1	0	0
Elongation factor 1-alpha 1 OS=Homo sapiens OX=9606 GN=EEF1A1 PE=1 SV=1	EF1A1_HUMAN (+1)	EEF1A1	50 kDa		0	3	0	6						cortical actin cytoskeleton		cortical actin cytoskeleton		cortical actin cytoskeleton, nucleolus				cortical actin cytoskeleton, nucleolus
Etoposide-induced protein 2.4 homolog OS=Homo sapiens OX=9606 GN=EI24 PE=1 SV=4	EI24_HUMAN	EI24	39 kDa		0	0	0	1
Eukaryotic translation initiation factor 3 subunit A OS=Homo sapiens OX=9606 GN=EIF3A PE=1 SV=1	EIF3A_HUMAN	EIF3A	167 kDa		3	0	2	2								microtubule		microtubule, nucleolus	microtubule	microtubule		microtubule, nucleolus	microtubule	microtubule	microtubule			structural molecule activity
Alpha-enolase OS=Homo sapiens OX=9606 GN=ENO1 PE=1 SV=2	ENOA_HUMAN	ENO1	47 kDa		1	1	0	0						cell cortex region				M band				M band		M band	M band
Ectopic P granules protein 5 homolog OS=Homo sapiens OX=9606 GN=EPG5 PE=1 SV=2	EPG5_HUMAN	EPG5	292 kDa		1	0	0	2
ERC protein 2 OS=Homo sapiens OX=9606 GN=ERC2 PE=1 SV=3	ERC2_HUMAN	ERC2	111 kDa		2	2	0	2				synaptic vesicle priming	synaptic vesicle priming	presynaptic active zone cytoplasmic component		cytoskeleton		cytoskeleton				cytoskeleton					structural constituent of presynaptic active zone	structural constituent of presynaptic active zone
Steroid hormone receptor ERR2 OS=Homo sapiens OX=9606 GN=ESRRB PE=1 SV=3	ERR2_HUMAN	ESRRB	48 kDa		0	0	1	2										condensed chromosome				condensed chromosome
Ellis-van Creveld syndrome protein OS=Homo sapiens OX=9606 GN=EVC PE=1 SV=1	EVC_HUMAN	EVC	112 kDa		1	1	0	0								ciliary basal body		ciliary basal body		ciliary basal body		ciliary basal body
Histone-lysine N-methyltransferase EZH2 OS=Homo sapiens OX=9606 GN=EZH2 PE=1 SV=2	EZH2_HUMAN	EZH2	85 kDa		1	0	1	0										chromosome, telomeric region, nuclear chromatin				chromosome, telomeric region, nuclear chromatin
Factor VIII intron 22 protein OS=Homo sapiens OX=9606 GN=F8A1 PE=1 SV=2	F8I2_HUMAN	F8A1	39 kDa		0	0	1	1
Protein FAM71E2 OS=Homo sapiens OX=9606 GN=FAM71E2 PE=2 SV=3	F71E2_HUMAN	FAM71E2	100 kDa		1	0	1	0
Protein FAM83D OS=Homo sapiens OX=9606 GN=FAM83D PE=1 SV=3	FA83D_HUMAN	FAM83D	64 kDa		1	1	2	0								mitotic spindle pole		mitotic spindle pole		mitotic spindle pole		mitotic spindle pole				kinesin binding, microtubule binding
Fanconi anemia group D2 protein OS=Homo sapiens OX=9606 GN=FANCD2 PE=1 SV=2	FACD2_HUMAN	FANCD2	164 kDa		1	1	2	2										condensed chromosome, nucleolus				condensed chromosome, nucleolus
Fatty acid synthase OS=Homo sapiens OX=9606 GN=FASN PE=1 SV=3	FAS_HUMAN	FASN	273 kDa		1	0	1	1
rRNA/tRNA 2'-O-methyltransferase fibrillarin-like protein 1 OS=Homo sapiens OX=9606 GN=FBLL1 PE=3 SV=2	FBLL1_HUMAN	FBLL1	35 kDa		0	0	1	0										box C/D snoRNP complex, fibrillar center				box C/D snoRNP complex, fibrillar center
F-box/WD repeat-containing protein 1A OS=Homo sapiens OX=9606 GN=BTRC PE=1 SV=1	FBW1A_HUMAN	BTRC	69 kDa		0	0	2	0										Pwp2p-containing subcomplex of 90S preribosome				Pwp2p-containing subcomplex of 90S preribosome
Polyphosphoinositide phosphatase OS=Homo sapiens OX=9606 GN=FIG4 PE=1 SV=1	FIG4_HUMAN	FIG4	104 kDa		1	0	0	2										lipid particle				lipid particle
Filamin A-interacting protein 1-like OS=Homo sapiens OX=9606 GN=FILIP1L PE=1 SV=2	FIL1L_HUMAN	FILIP1L	130 kDa		0	2	0	0
Focadhesin OS=Homo sapiens OX=9606 GN=FOCAD PE=1 SV=1	FOCAD_HUMAN	FOCAD	200 kDa		0	0	0	2
Forkhead box protein D4 OS=Homo sapiens OX=9606 GN=FOXD4 PE=2 SV=4	FOXD4_HUMAN	FOXD4	47 kDa		2	0	1	0
Glyceraldehyde-3-phosphate dehydrogenase OS=Homo sapiens OX=9606 GN=GAPDH PE=1 SV=3	G3P_HUMAN	GAPDH	36 kDa		2	0	1	0								microtubule cytoskeleton		lipid particle, microtubule cytoskeleton		microtubule cytoskeleton		lipid particle, microtubule cytoskeleton				microtubule binding
Germinal-center associated nuclear protein OS=Homo sapiens OX=9606 GN=MCM3AP PE=1 SV=2	GANP_HUMAN	MCM3AP	218 kDa		0	0	1	0										chromosome				chromosome
Glycerate kinase OS=Homo sapiens OX=9606 GN=GLYCTK PE=1 SV=1	GLCTK_HUMAN	GLYCTK	55 kDa		0	0	1	0
Glycerol-3-phosphate dehydrogenase 1-like protein OS=Homo sapiens OX=9606 GN=GPD1L PE=1 SV=1	GPD1L_HUMAN	GPD1L	38 kDa		0	0	0	1
Probable G-protein coupled receptor 19 OS=Homo sapiens OX=9606 GN=GPR19 PE=2 SV=2	GPR19_HUMAN	GPR19	48 kDa		2	0	1	0
Protein GREB1 OS=Homo sapiens OX=9606 GN=GREB1 PE=2 SV=1	GREB1_HUMAN	GREB1	216 kDa		1	0	2	1
Glutamate receptor 3 OS=Homo sapiens OX=9606 GN=GRIA3 PE=1 SV=2	GRIA3_HUMAN	GRIA3	101 kDa		0	1	0	1
G protein-regulated inducer of neurite outgrowth 1 OS=Homo sapiens OX=9606 GN=GPRIN1 PE=1 SV=2	GRIN1_HUMAN	GPRIN1	102 kDa		0	0	1	1
Histone H4 OS=Homo sapiens OX=9606 GN=HIST1H4A PE=1 SV=2	H4_HUMAN	HIST1H4A	11 kDa		2	2	2	2										nuclear chromosome, nuclear chromosome, telomeric region, nuclear nucleosome				nuclear chromosome, nuclear chromosome, telomeric region, nuclear nucleosome
Heparan-sulfate 6-O-sulfotransferase 1 OS=Homo sapiens OX=9606 GN=HS6ST1 PE=1 SV=5	H6ST1_HUMAN	HS6ST1	48 kDa		1	0	0	0
Histone H3.1t OS=Homo sapiens OX=9606 GN=HIST3H3 PE=1 SV=3	H31T_HUMAN (+3)	HIST3H3	16 kDa		0	6	0	7										nuclear chromosome, telomeric region, nuclear nucleosome				nuclear chromosome, telomeric region, nuclear nucleosome
E3 ubiquitin-protein ligase HECTD1 OS=Homo sapiens OX=9606 GN=HECTD1 PE=1 SV=3	HECD1_HUMAN	HECTD1	289 kDa		0	0	2	0
Heterogeneous nuclear ribonucleoprotein U OS=Homo sapiens OX=9606 GN=HNRNPU PE=1 SV=6	HNRPU_HUMAN	HNRNPU	91 kDa		3	1	2	0				dendritic transport of messenger ribonucleoprotein complex	dendritic transport of messenger ribonucleoprotein complex	dendrite cytoplasm	cytoplasmic ribonucleoprotein granule	centrosome, mitotic spindle, mitotic spindle microtubule, mitotic spindle midzone, spindle pole		centrosome, condensed chromosome kinetochore, cytoplasmic ribonucleoprotein granule, inactive sex chromosome, kinetochore, mitotic spindle, mitotic spindle microtubule, mitotic spindle midzone, nuclear chromosome, spindle pole	mitotic spindle microtubule	centrosome, mitotic spindle, mitotic spindle microtubule, mitotic spindle midzone, spindle pole		centrosome, condensed chromosome kinetochore, cytoplasmic ribonucleoprotein granule, inactive sex chromosome, kinetochore, mitotic spindle, mitotic spindle microtubule, mitotic spindle midzone, nuclear chromosome, spindle pole	mitotic spindle microtubule	mitotic spindle microtubule	mitotic spindle microtubule	actin binding
Hornerin OS=Homo sapiens OX=9606 GN=HRNR PE=1 SV=2	HORN_HUMAN	HRNR	282 kDa		1	0	1	1		establishment of skin barrier																		structural constituent of epidermis
Heat shock protein HSP 90-beta OS=Homo sapiens OX=9606 GN=HSP90AB1 PE=1 SV=4	HS90B_HUMAN	HSP90AB1	83 kDa		1	0	0	0																		tau protein binding
Type II inositol 1,4,5-trisphosphate 5-phosphatase OS=Homo sapiens OX=9606 GN=INPP5B PE=1 SV=4	I5P2_HUMAN	INPP5B	113 kDa		0	0	2	1
Islet cell autoantigen 1-like protein OS=Homo sapiens OX=9606 GN=ICA1L PE=1 SV=1	ICA1L_HUMAN	ICA1L	54 kDa		0	1	0	0
Interferon-induced protein with tetratricopeptide repeats 3 OS=Homo sapiens OX=9606 GN=IFIT3 PE=1 SV=1	IFIT3_HUMAN	IFIT3	56 kDa		0	0	1	1
Integrator complex subunit 1 OS=Homo sapiens OX=9606 GN=INTS1 PE=1 SV=2	INT1_HUMAN	INTS1	244 kDa		1	0	0	0
IQ domain-containing protein E OS=Homo sapiens OX=9606 GN=IQCE PE=1 SV=2	IQCE_HUMAN	IQCE	77 kDa		0	0	2	0
IQ motif and SEC7 domain-containing protein 2 OS=Homo sapiens OX=9606 GN=IQSEC2 PE=1 SV=2	IQEC2_HUMAN	IQSEC2	163 kDa		0	0	1	0
Integrin alpha-E OS=Homo sapiens OX=9606 GN=ITGAE PE=1 SV=3	ITAE_HUMAN	ITGAE	130 kDa		1	1	2	1	cell adhesion
Uncharacterized protein KIAA1671 OS=Homo sapiens OX=9606 GN=KIAA1671 PE=1 SV=2	K1671_HUMAN	KIAA1671	197 kDa		2	0	0	1
Lysine-specific demethylase 2B OS=Homo sapiens OX=9606 GN=KDM2B PE=1 SV=1	KDM2B_HUMAN	KDM2B	153 kDa		1	0	1	0										chromosome, nucleolus				chromosome, nucleolus
Kinesin-like protein KIF21A OS=Homo sapiens OX=9606 GN=KIF21A PE=1 SV=2	KI21A_HUMAN	KIF21A	187 kDa		0	2	0	1								kinesin complex, microtubule		kinesin complex, microtubule	microtubule	kinesin complex, microtubule		kinesin complex, microtubule	microtubule	microtubule	microtubule	microtubule binding
Kinesin-like protein KIF26A OS=Homo sapiens OX=9606 GN=KIF26A PE=1 SV=3	KI26A_HUMAN	KIF26A	195 kDa		2	0	0	0								kinesin complex, microtubule		kinesin complex, microtubule	microtubule	kinesin complex, microtubule		kinesin complex, microtubule	microtubule	microtubule	microtubule	microtubule binding
Proliferation marker protein Ki-67 OS=Homo sapiens OX=9606 GN=MKI67 PE=1 SV=2	KI67_HUMAN	MKI67	359 kDa		0	4	0	4										chromosome, nucleolus				chromosome, nucleolus
Histone-lysine N-methyltransferase 2A OS=Homo sapiens OX=9606 GN=KMT2A PE=1 SV=5	KMT2A_HUMAN	KMT2A	432 kDa		0	0	1	4
Krev interaction trapped protein 1 OS=Homo sapiens OX=9606 GN=KRIT1 PE=1 SV=2	KRIT1_HUMAN	KRIT1	84 kDa		1	1	1	1								cytoskeleton		cytoskeleton				cytoskeleton				microtubule binding
LIM domain and actin-binding protein 1 OS=Homo sapiens OX=9606 GN=LIMA1 PE=1 SV=1	LIMA1_HUMAN	LIMA1	85 kDa		1	0	2	0								actin cytoskeleton, stress fiber		actin cytoskeleton, stress fiber				actin cytoskeleton, stress fiber				actin filament binding, actin monomer binding
LIM domain only protein 7 OS=Homo sapiens OX=9606 GN=LMO7 PE=1 SV=3	LMO7_HUMAN	LMO7	193 kDa		0	0	2	1
Lysosomal-trafficking regulator OS=Homo sapiens OX=9606 GN=LYST PE=1 SV=3	LYST_HUMAN	LYST	429 kDa		2	0	1	0								microtubule cytoskeleton		microtubule cytoskeleton		microtubule cytoskeleton		microtubule cytoskeleton
Microtubule-actin cross-linking factor 1, isoforms 1/2/3/5 OS=Homo sapiens OX=9606 GN=MACF1 PE=1 SV=4	MACF1_HUMAN	MACF1	838 kDa		2	3	2	1				Golgi to plasma membrane protein transport				actin cytoskeleton, microtubule		actin cytoskeleton, microtubule	microtubule	microtubule		actin cytoskeleton, microtubule	microtubule	microtubule	microtubule	actin filament binding, microtubule minus-end binding		structural molecule activity
Microtubule-associated protein 1A OS=Homo sapiens OX=9606 GN=MAP1A PE=1 SV=6	MAP1A_HUMAN	MAP1A	305 kDa		2	1	0	0				anterograde axonal protein transport, retrograde axonal protein transport	anterograde axonal protein transport, retrograde axonal protein transport	axon cytoplasm		dendritic microtubule, microtubule associated complex		dendritic microtubule, microtubule associated complex	dendritic microtubule	dendritic microtubule, microtubule associated complex		dendritic microtubule, microtubule associated complex	dendritic microtubule	dendritic microtubule	dendritic microtubule	actin binding, cytoskeletal adaptor activity, microtubule binding, tau protein binding, tubulin binding		structural molecule activity
MAX gene-associated protein OS=Homo sapiens OX=9606 GN=MGA PE=1 SV=3	MGAP_HUMAN	MGA	332 kDa		0	1	1	1
Msx2-interacting protein OS=Homo sapiens OX=9606 GN=SPEN PE=1 SV=1	MINT_HUMAN	SPEN	402 kDa		0	0	2	0
Mitogen-activated protein kinase 11 OS=Homo sapiens OX=9606 GN=MAPK11 PE=1 SV=2	MK11_HUMAN	MAPK11	41 kDa		1	0	0	0
Transcriptional activator MN1 OS=Homo sapiens OX=9606 GN=MN1 PE=1 SV=3	MN1_HUMAN	MN1	136 kDa		0	1	0	0
Myotubularin-related protein 12 OS=Homo sapiens OX=9606 GN=MTMR12 PE=1 SV=2	MTMRC_HUMAN	MTMR12	86 kDa		0	1	1	1										sarcomere				sarcomere		sarcomere	sarcomere
Unconventional myosin-XVIIIa OS=Homo sapiens OX=9606 GN=MYO18A PE=1 SV=3	MY18A_HUMAN	MYO18A	233 kDa		0	0	1	3								actomyosin, myosin complex		actomyosin, myosin complex				actomyosin, myosin complex				actin filament binding
E3 ubiquitin-protein ligase MYCBP2 OS=Homo sapiens OX=9606 GN=MYCBP2 PE=1 SV=3	MYCB2_HUMAN	MYCBP2	510 kDa		2	1	1	0								microtubule cytoskeleton		microtubule cytoskeleton		microtubule cytoskeleton		microtubule cytoskeleton
Putative uncharacterized protein MYH16 OS=Homo sapiens OX=9606 GN=MYH16 PE=1 SV=2	MYH16_HUMAN	MYH16	128 kDa		0	0	1	0								myosin complex		myosin complex				myosin complex
Unconventional myosin-Va OS=Homo sapiens OX=9606 GN=MYO5A PE=1 SV=2	MYO5A_HUMAN	MYO5A	215 kDa		1	1	2	1				melanosome transport, protein localization to plasma membrane, vesicle transport along actin filament	melanosome transport, vesicle transport along actin filament			actomyosin, intermediate filament, microtubule plus-end, unconventional myosin complex		actomyosin, intermediate filament, microtubule plus-end, unconventional myosin complex	microtubule plus-end	microtubule plus-end	microtubule plus-end	actomyosin, intermediate filament, microtubule plus-end, unconventional myosin complex	intermediate filament, microtubule plus-end	intermediate filament, microtubule plus-end	intermediate filament, microtubule plus-end	actin filament binding
Unconventional myosin-X OS=Homo sapiens OX=9606 GN=MYO10 PE=1 SV=3	MYO10_HUMAN	MYO10	237 kDa		1	3	1	1						cell cortex		myosin complex		myosin complex, nucleolus				myosin complex, nucleolus				actin filament binding, spectrin binding
Myosin-binding protein C, cardiac-type OS=Homo sapiens OX=9606 GN=MYBPC3 PE=1 SV=4	MYPC3_HUMAN	MYBPC3	141 kDa		1	0	1	1	cell adhesion							striated muscle myosin thick filament, striated muscle thin filament		A band, C zone, M band, Z disc, cardiac myofibril, sarcomere, striated muscle myosin thick filament, striated muscle thin filament				A band, C zone, M band, Z disc, cardiac myofibril, sarcomere, striated muscle myosin thick filament, striated muscle thin filament		A band, C zone, M band, Z disc, cardiac myofibril, sarcomere, striated muscle myosin thick filament, striated muscle thin filament	A band, C zone, M band, Z disc, cardiac myofibril, sarcomere, striated muscle myosin thick filament, striated muscle thin filament	actin filament binding, muscle alpha-actinin binding, myosin heavy chain binding, titin binding		structural constituent of muscle
Nanos homolog 1 OS=Homo sapiens OX=9606 GN=NANOS1 PE=1 SV=2	NANO1_HUMAN	NANOS1	30 kDa		1	0	1	1
Napsin-A OS=Homo sapiens OX=9606 GN=NAPSA PE=1 SV=1	NAPSA_HUMAN	NAPSA	45 kDa		1	1	1	1
Nuclear receptor coactivator 3 OS=Homo sapiens OX=9606 GN=NCOA3 PE=1 SV=1	NCOA3_HUMAN	NCOA3	155 kDa		0	0	1	0										nuclear chromatin				nuclear chromatin
Neurofibromin OS=Homo sapiens OX=9606 GN=NF1 PE=1 SV=2	NF1_HUMAN	NF1	319 kDa		1	0	2	0										nucleolus				nucleolus
Homeobox protein Nkx-3.2 OS=Homo sapiens OX=9606 GN=NKX3-2 PE=2 SV=2	NKX32_HUMAN	NKX3-2	35 kDa		1	1	1	0
Homeobox protein NOBOX OS=Homo sapiens OX=9606 GN=NOBOX PE=1 SV=4	NOBOX_HUMAN	NOBOX	74 kDa		0	1	0	0
Sphingomyelin phosphodiesterase 3 OS=Homo sapiens OX=9606 GN=SMPD3 PE=1 SV=1	NSMA2_HUMAN	SMPD3	71 kDa		0	0	2	0
Olfactory receptor 52H1 OS=Homo sapiens OX=9606 GN=OR52H1 PE=2 SV=3	O52H1_HUMAN	OR52H1	36 kDa		1	0	0	0
Obscurin OS=Homo sapiens OX=9606 GN=OBSCN PE=1 SV=3	OBSCN_HUMAN	OBSCN	868 kDa		2	1	1	1										M band, Z disc, myofibril				M band, Z disc, myofibril		M band, Z disc, myofibril	M band, Z disc, myofibril	ankyrin binding, titin binding		structural constituent of muscle
Dynamin-like 120 kDa protein, mitochondrial OS=Homo sapiens OX=9606 GN=OPA1 PE=1 SV=3	OPA1_HUMAN	OPA1	112 kDa		2	0	1	0				axonal transport of mitochondrion	axonal transport of mitochondrion	axon cytoplasm												microtubule binding
5-oxoprolinase OS=Homo sapiens OX=9606 GN=OPLAH PE=1 SV=3	OPLA_HUMAN	OPLAH	137 kDa		2	1	1	1
Otoancorin OS=Homo sapiens OX=9606 GN=OTOA PE=1 SV=1	OTOAN_HUMAN	OTOA	129 kDa		1	2	0	1	cell-matrix adhesion
Propionyl-CoA carboxylase beta chain, mitochondrial OS=Homo sapiens OX=9606 GN=PCCB PE=1 SV=3	PCCB_HUMAN	PCCB	58 kDa		0	1	1	0
Protocadherin-15 OS=Homo sapiens OX=9606 GN=PCDH15 PE=1 SV=2	PCD15_HUMAN	PCDH15	216 kDa		1	1	1	1	homophilic cell adhesion via plasma membrane adhesion molecules
Pericentriolar material 1 protein OS=Homo sapiens OX=9606 GN=PCM1 PE=1 SV=5	PCM1_HUMAN	PCM1	229 kDa		3	1	0	1				intraciliary transport involved in cilium assembly	intraciliary transport involved in cilium assembly			centriolar satellite, centriole, centrosome, ciliary basal body, pericentriolar material		centriolar satellite, centriole, centrosome, ciliary basal body, pericentriolar material		centriolar satellite, centriole, centrosome, ciliary basal body, pericentriolar material		centriolar satellite, centriole, centrosome, ciliary basal body, pericentriolar material
Calcium/calmodulin-dependent 3',5'-cyclic nucleotide phosphodiesterase 1C OS=Homo sapiens OX=9606 GN=PDE1C PE=1 SV=1	PDE1C_HUMAN	PDE1C	81 kDa		2	0	0	0
High affinity cGMP-specific 3',5'-cyclic phosphodiesterase 9A OS=Homo sapiens OX=9606 GN=PDE9A PE=1 SV=1	PDE9A_HUMAN	PDE9A	68 kDa		0	1	1	0
Basement membrane-specific heparan sulfate proteoglycan core protein OS=Homo sapiens OX=9606 GN=HSPG2 PE=1 SV=4	PGBM_HUMAN	HSPG2	469 kDa		1	0	2	0	substrate adhesion-dependent cell spreading																			extracellular matrix structural constituent conferring compression resistance
Phosphate-regulating neutral endopeptidase OS=Homo sapiens OX=9606 GN=PHEX PE=1 SV=1	PHEX_HUMAN	PHEX	86 kDa		1	0	0	0
Polycystic kidney disease protein 1-like 3 OS=Homo sapiens OX=9606 GN=PKD1L3 PE=1 SV=1	PK1L3_HUMAN	PKD1L3	196 kDa		1	2	0	1
Serine/threonine-protein kinase N1 OS=Homo sapiens OX=9606 GN=PKN1 PE=1 SV=2	PKN1_HUMAN	PKN1	104 kDa		3	0	0	1
Plectin OS=Homo sapiens OX=9606 GN=PLEC PE=1 SV=3	PLEC_HUMAN	PLEC	532 kDa		6	1	1	1								intermediate filament cytoskeleton		costamere, intermediate filament cytoskeleton				costamere, intermediate filament cytoskeleton		costamere	costamere	actin binding, ankyrin binding		structural constituent of cytoskeleton, structural constituent of muscle
Serine/threonine-protein kinase PLK1 OS=Homo sapiens OX=9606 GN=PLK1 PE=1 SV=1	PLK1_HUMAN	PLK1	68 kDa		2	0	2	0								centriolar satellite, centriole, centrosome, microtubule cytoskeleton, spindle, spindle midzone, spindle pole		centriolar satellite, centriole, centrosome, chromatin, condensed nuclear chromosome outer kinetochore, kinetochore, microtubule cytoskeleton, spindle, spindle midzone, spindle pole, synaptonemal complex		centriolar satellite, centriole, centrosome, microtubule cytoskeleton, spindle, spindle midzone, spindle pole		centriolar satellite, centriole, centrosome, chromatin, condensed nuclear chromosome outer kinetochore, kinetochore, microtubule cytoskeleton, spindle, spindle midzone, spindle pole, synaptonemal complex				microtubule binding
Nicotinate phosphoribosyltransferase OS=Homo sapiens OX=9606 GN=NAPRT PE=1 SV=2	PNCB_HUMAN	NAPRT	58 kDa		1	1	1	1
Protein PRRC2A OS=Homo sapiens OX=9606 GN=PRRC2A PE=1 SV=3	PRC2A_HUMAN	PRRC2A	229 kDa		2	0	2	1
PR domain zinc finger protein 16 OS=Homo sapiens OX=9606 GN=PRDM16 PE=1 SV=3	PRD16_HUMAN	PRDM16	140 kDa		0	1	0	0
Peroxiredoxin-6 OS=Homo sapiens OX=9606 GN=PRDX6 PE=1 SV=3	PRDX6_HUMAN	PRDX6	25 kDa		1	0	1	0
Pre-mRNA-processing-splicing factor 8 OS=Homo sapiens OX=9606 GN=PRPF8 PE=1 SV=2	PRP8_HUMAN	PRPF8	274 kDa		1	1	0	0
Proteasome subunit alpha type-7 OS=Homo sapiens OX=9606 GN=PSMA7 PE=1 SV=1	PSA7_HUMAN	PSMA7	28 kDa		0	0	1	0
R3H domain-containing protein 1 OS=Homo sapiens OX=9606 GN=R3HDM1 PE=1 SV=3	R3HD1_HUMAN	R3HDM1	121 kDa		0	1	0	1
DNA repair protein RAD50 OS=Homo sapiens OX=9606 GN=RAD50 PE=1 SV=1	RAD50_HUMAN	RAD50	154 kDa		0	3	0	4										condensed nuclear chromosome, nuclear chromatin, nuclear chromosome, telomeric region, site of double-strand break				condensed nuclear chromosome, nuclear chromatin, nuclear chromosome, telomeric region, site of double-strand break
DNA repair and recombination protein RAD54-like OS=Homo sapiens OX=9606 GN=RAD54L PE=1 SV=2	RAD54_HUMAN	RAD54L	84 kDa		0	0	1	0
RalA-binding protein 1 OS=Homo sapiens OX=9606 GN=RALBP1 PE=1 SV=3	RBP1_HUMAN	RALBP1	76 kDa		1	0	0	0
DNA polymerase zeta catalytic subunit OS=Homo sapiens OX=9606 GN=REV3L PE=1 SV=2	REV3L_HUMAN	REV3L	353 kDa		2	2	2	2										nucleolus				nucleolus
Replication factor C subunit 1 OS=Homo sapiens OX=9606 GN=RFC1 PE=1 SV=4	RFC1_HUMAN	RFC1	128 kDa		0	1	1	1										DNA replication factor C complex, Elg1 RFC-like complex, nucleolus				DNA replication factor C complex, Elg1 RFC-like complex, nucleolus
Rho GTPase-activating protein 25 OS=Homo sapiens OX=9606 GN=ARHGAP25 PE=1 SV=2	RHG25_HUMAN	ARHGAP25	73 kDa		0	2	1	0
Rho GTPase-activating protein 35 OS=Homo sapiens OX=9606 GN=ARHGAP35 PE=1 SV=3	RHG35_HUMAN	ARHGAP35	171 kDa		1	1	1	1								actin cytoskeleton, ciliary basal body		actin cytoskeleton, ciliary basal body		ciliary basal body		actin cytoskeleton, ciliary basal body
Rho GTPase-activating protein 42 OS=Homo sapiens OX=9606 GN=ARHGAP42 PE=1 SV=3	RHG42_HUMAN	ARHGAP42	99 kDa		1	1	0	0
Ubiquitin-60S ribosomal protein L40 OS=Homo sapiens OX=9606 GN=UBA52 PE=1 SV=2	RL40_HUMAN (+3)	UBA52	15 kDa		1	0	1	0										cytosolic large ribosomal subunit, cytosolic small ribosomal subunit				cytosolic large ribosomal subunit, cytosolic small ribosomal subunit						structural constituent of ribosome
RING finger protein 39 OS=Homo sapiens OX=9606 GN=RNF39 PE=1 SV=2	RNF39_HUMAN	RNF39	46 kDa		0	0	0	0
Heterogeneous nuclear ribonucleoprotein A1 OS=Homo sapiens OX=9606 GN=HNRNPA1 PE=1 SV=5	ROA1_HUMAN	HNRNPA1	39 kDa		1	0	1	0
Tyrosine-protein kinase transmembrane receptor ROR2 OS=Homo sapiens OX=9606 GN=ROR2 PE=1 SV=2	ROR2_HUMAN	ROR2	105 kDa		1	1	1	0								microtubule		microtubule	microtubule	microtubule		microtubule	microtubule	microtubule	microtubule
Rap guanine nucleotide exchange factor 2 OS=Homo sapiens OX=9606 GN=RAPGEF2 PE=1 SV=1	RPGF2_HUMAN	RAPGEF2	167 kDa		2	0	0	0				protein localization to plasma membrane
Rap guanine nucleotide exchange factor 6 OS=Homo sapiens OX=9606 GN=RAPGEF6 PE=1 SV=2	RPGF6_HUMAN	RAPGEF6	179 kDa		0	0	0	1				protein localization to plasma membrane				centrosome		centrosome		centrosome		centrosome
Ribosomal RNA processing protein 1 homolog A OS=Homo sapiens OX=9606 GN=RRP1 PE=1 SV=1	RRP1_HUMAN	RRP1	53 kDa		0	0	2	0										nucleolus				nucleolus
RRP12-like protein OS=Homo sapiens OX=9606 GN=RRP12 PE=1 SV=2	RRP12_HUMAN	RRP12	144 kDa		1	1	1	1										nucleolus				nucleolus
40S ribosomal protein S3a OS=Homo sapiens OX=9606 GN=RPS3A PE=1 SV=2	RS3A_HUMAN	RPS3A	30 kDa		1	0	0	0										cytosolic small ribosomal subunit, nucleolus				cytosolic small ribosomal subunit, nucleolus						structural constituent of ribosome
Ryanodine receptor 3 OS=Homo sapiens OX=9606 GN=RYR3 PE=1 SV=3	RYR3_HUMAN	RYR3	552 kDa		2	1	4	1										Z disc				Z disc		Z disc	Z disc
Protein S100-A6 OS=Homo sapiens OX=9606 GN=S100A6 PE=1 SV=1	S10A6_HUMAN	S100A6	10 kDa		0	0	1	0																		tropomyosin binding
Protein S100-A12 OS=Homo sapiens OX=9606 GN=S100A12 PE=1 SV=2	S10AC_HUMAN	S100A12	11 kDa		0	0	1	0								cytoskeleton		cytoskeleton				cytoskeleton
Testis anion transporter 1 OS=Homo sapiens OX=9606 GN=SLC26A8 PE=1 SV=1	S26A8_HUMAN	SLC26A8	109 kDa		2	0	0	0
Sex comb on midleg-like protein 2 OS=Homo sapiens OX=9606 GN=SCML2 PE=1 SV=1	SCML2_HUMAN	SCML2	77 kDa		0	3	0	3
Splicing factor 3B subunit 1 OS=Homo sapiens OX=9606 GN=SF3B1 PE=1 SV=3	SF3B1_HUMAN	SF3B1	146 kDa		2	0	0	0
Protein Shroom3 OS=Homo sapiens OX=9606 GN=SHROOM3 PE=1 SV=2	SHRM3_HUMAN	SHROOM3	217 kDa		1	1	1	1						cortical actin cytoskeleton		cortical actin cytoskeleton, microtubule		cortical actin cytoskeleton, microtubule	microtubule	microtubule		cortical actin cytoskeleton, microtubule	microtubule	microtubule	microtubule	actin filament binding
Serine/threonine-protein kinase SMG1 OS=Homo sapiens OX=9606 GN=SMG1 PE=1 SV=3	SMG1_HUMAN	SMG1	410 kDa		1	0	1	1
Sterol regulatory element-binding protein 2 OS=Homo sapiens OX=9606 GN=SREBF2 PE=1 SV=2	SRBP2_HUMAN	SREBF2	124 kDa		2	0	2	0
SRC kinase signaling inhibitor 1 OS=Homo sapiens OX=9606 GN=SRCIN1 PE=1 SV=4	SRCN1_HUMAN	SRCIN1	127 kDa		4	0	1	0	substrate adhesion-dependent cell spreading							actin cytoskeleton		actin cytoskeleton				actin cytoskeleton
Signal recognition particle 14 kDa protein OS=Homo sapiens OX=9606 GN=SRP14 PE=1 SV=2	SRP14_HUMAN	SRP14	15 kDa		0	0	1	2
Serine/arginine repetitive matrix protein 5 OS=Homo sapiens OX=9606 GN=SRRM5 PE=1 SV=3	SRRM5_HUMAN	SRRM5	80 kDa		2	0	0	0
Serine/arginine-rich splicing factor 7 OS=Homo sapiens OX=9606 GN=SRSF7 PE=1 SV=1	SRSF7_HUMAN	SRSF7	27 kDa		0	1	2	1
Syntaxin-2 OS=Homo sapiens OX=9606 GN=STX2 PE=1 SV=3	STX2_HUMAN	STX2	33 kDa		1	0	0	0				synaptic vesicle fusion to presynaptic active zone membrane	synaptic vesicle fusion to presynaptic active zone membrane
ATP-dependent RNA helicase SUPV3L1, mitochondrial OS=Homo sapiens OX=9606 GN=SUPV3L1 PE=1 SV=1	SUV3_HUMAN	SUPV3L1	88 kDa		0	1	0	0										mitochondrial nucleoid				mitochondrial nucleoid
Bifunctional glutamate/proline--tRNA ligase OS=Homo sapiens OX=9606 GN=EPRS PE=1 SV=5	SYEP_HUMAN	EPRS	171 kDa		0	0	0	2
Synaptopodin 2-like protein OS=Homo sapiens OX=9606 GN=SYNPO2L PE=2 SV=3	SYP2L_HUMAN	SYNPO2L	102 kDa		0	3	0	4								actin cytoskeleton		Z disc, actin cytoskeleton				Z disc, actin cytoskeleton		Z disc	Z disc	actin binding
Transcription initiation factor TFIID subunit 6 OS=Homo sapiens OX=9606 GN=TAF6 PE=1 SV=1	TAF6_HUMAN	TAF6	73 kDa		0	1	1	1									SAGA complex, SLIK (SAGA-like) complex, transcription factor TFTC complex
TBC1 domain family member 10B OS=Homo sapiens OX=9606 GN=TBC1D10B PE=1 SV=3	TB10B_HUMAN	TBC1D10B	87 kDa		1	0	0	2
Tubulin beta-4B chain OS=Homo sapiens OX=9606 GN=TUBB4B PE=1 SV=1	TBB4B_HUMAN (+1)	TUBB4B	50 kDa		1	1	0	1								microtubule		microtubule	microtubule	microtubule		microtubule	microtubule	microtubule	microtubule			structural constituent of cytoskeleton
TBC1 domain family member 20 OS=Homo sapiens OX=9606 GN=TBC1D20 PE=1 SV=1	TBC20_HUMAN	TBC1D20	46 kDa		1	1	1	1				cargo loading into COPII-coated vesicle	cargo loading into COPII-coated vesicle
Transcription elongation factor A protein-like 1 OS=Homo sapiens OX=9606 GN=TCEAL1 PE=1 SV=2	TCAL1_HUMAN	TCEAL1	18 kDa		1	1	1	0
Transcription elongation factor A protein 2 OS=Homo sapiens OX=9606 GN=TCEA2 PE=1 SV=1	TCEA2_HUMAN	TCEA2	34 kDa		1	0	0	1
T-complex protein 1 subunit alpha OS=Homo sapiens OX=9606 GN=TCP1 PE=1 SV=1	TCPA_HUMAN	TCP1	60 kDa		0	0	1	0								centrosome, microtubule, pericentriolar material		centrosome, microtubule, nuclear heterochromatin, pericentriolar material	microtubule	centrosome, microtubule, pericentriolar material		centrosome, microtubule, nuclear heterochromatin, pericentriolar material	microtubule	microtubule	microtubule
Tenascin OS=Homo sapiens OX=9606 GN=TNC PE=1 SV=3	TENA_HUMAN	TNC	241 kDa		1	1	1	0	cell adhesion																			extracellular matrix structural constituent
Protein-glutamine gamma-glutamyltransferase E OS=Homo sapiens OX=9606 GN=TGM3 PE=1 SV=4	TGM3_HUMAN	TGM3	77 kDa		0	0	1	0
Triokinase/FMN cyclase OS=Homo sapiens OX=9606 GN=TKFC PE=1 SV=2	TKFC_HUMAN	TKFC	59 kDa		2	0	0	0
Transketolase OS=Homo sapiens OX=9606 GN=TKT PE=1 SV=3	TKT_HUMAN	TKT	68 kDa		0	1	0	1
Transmembrane and coiled-coil domain-containing protein 6 OS=Homo sapiens OX=9606 GN=TMCO6 PE=1 SV=2	TMCO6_HUMAN	TMCO6	54 kDa		1	0	1	1				protein import into nucleus	protein import into nucleus
Transmembrane protease serine 13 OS=Homo sapiens OX=9606 GN=TMPRSS13 PE=2 SV=4	TMPSD_HUMAN (+1)	TMPRSS13	63 kDa		0	0	0	0
Tumor necrosis factor alpha-induced protein 3 OS=Homo sapiens OX=9606 GN=TNFAIP3 PE=1 SV=1	TNAP3_HUMAN	TNFAIP3	90 kDa		0	0	0	0
T-cell receptor gamma-2 chain C region OS=Homo sapiens OX=9606 GN=TRGC2 PE=1 SV=1	TRGC2_HUMAN	TRGC2	22 kDa		1	0	0	0
Tripartite motif-containing protein 72 OS=Homo sapiens OX=9606 GN=TRIM72 PE=1 SV=2	TRI72_HUMAN	TRIM72	53 kDa		0	1	0	0
E3 ubiquitin-protein ligase TRIM7 OS=Homo sapiens OX=9606 GN=TRIM7 PE=1 SV=2	TRIM7_HUMAN	TRIM7	57 kDa		2	0	1	0
Tetratricopeptide repeat protein 39C OS=Homo sapiens OX=9606 GN=TTC39C PE=2 SV=2	TT39C_HUMAN	TTC39C	66 kDa		0	0	0	2
Tetratricopeptide repeat protein 28 OS=Homo sapiens OX=9606 GN=TTC28 PE=1 SV=4	TTC28_HUMAN	TTC28	271 kDa		1	1	2	0								microtubule organizing center, mitotic spindle, spindle pole		microtubule organizing center, mitotic spindle, spindle pole		microtubule organizing center, mitotic spindle, spindle pole		microtubule organizing center, mitotic spindle, spindle pole
Tetratricopeptide repeat protein 37 OS=Homo sapiens OX=9606 GN=TTC37 PE=1 SV=1	TTC37_HUMAN	TTC37	175 kDa		0	1	1	0										transcriptionally active chromatin				transcriptionally active chromatin
Terminal uridylyltransferase 7 OS=Homo sapiens OX=9606 GN=ZCCHC6 PE=1 SV=1	TUT7_HUMAN	ZCCHC6	171 kDa		1	1	0	1
Ubiquitin carboxyl-terminal hydrolase 28 OS=Homo sapiens OX=9606 GN=USP28 PE=1 SV=1	UBP28_HUMAN	USP28	122 kDa		0	2	2	0
Serine/threonine-protein kinase ULK2 OS=Homo sapiens OX=9606 GN=ULK2 PE=1 SV=3	ULK2_HUMAN	ULK2	113 kDa		0	0	1	1
Urea transporter 2 OS=Homo sapiens OX=9606 GN=SLC14A2 PE=1 SV=3	UT2_HUMAN	SLC14A2	101 kDa		1	0	1	0
Vimentin OS=Homo sapiens OX=9606 GN=VIM PE=1 SV=4	VIME_HUMAN	VIM	54 kDa		0	0	1	1								cytoskeleton, intermediate filament		cytoskeleton, intermediate filament				cytoskeleton, intermediate filament	intermediate filament	intermediate filament	intermediate filament			structural constituent of cytoskeleton, structural constituent of eye lens
Protein virilizer homolog OS=Homo sapiens OX=9606 GN=VIRMA PE=1 SV=2	VIR_HUMAN	VIRMA	202 kDa		3	2	1	0
Vacuolar protein sorting-associated protein 13D OS=Homo sapiens OX=9606 GN=VPS13D PE=1 SV=2	VP13D_HUMAN	VPS13D	492 kDa		1	2	2	1
von Willebrand factor A domain-containing protein 5B2 OS=Homo sapiens OX=9606 GN=VWA5B2 PE=2 SV=2	VW5B2_HUMAN	VWA5B2	133 kDa		0	1	1	0
WD repeat and FYVE domain-containing protein 3 OS=Homo sapiens OX=9606 GN=WDFY3 PE=1 SV=2	WDFY3_HUMAN	WDFY3	395 kDa		0	0	0	2										nucleolus				nucleolus
Protein WWC2 OS=Homo sapiens OX=9606 GN=WWC2 PE=1 SV=2	WWC2_HUMAN	WWC2	134 kDa		0	0	1	0
XK-related protein 5 OS=Homo sapiens OX=9606 GN=XKR5 PE=2 SV=2	XKR5_HUMAN	XKR5	75 kDa		2	0	0	0
Xaa-Pro aminopeptidase 1 OS=Homo sapiens OX=9606 GN=XPNPEP1 PE=1 SV=3	XPP1_HUMAN	XPNPEP1	70 kDa		3	1	1	0
Uncharacterized protein FLJ43738 OS=Homo sapiens OX=9606 PE=2 SV=1	YC006_HUMAN		66 kDa		0	0	1	0
Uncharacterized protein DKFZp434B061 OS=Homo sapiens OX=9606 PE=2 SV=2	YM012_HUMAN		59 kDa		0	4	0	2
Zinc finger BED domain-containing protein 4 OS=Homo sapiens OX=9606 GN=ZBED4 PE=1 SV=2	ZBED4_HUMAN	ZBED4	130 kDa		0	1	1	1
Zinc finger CCCH domain-containing protein 14 OS=Homo sapiens OX=9606 GN=ZC3H14 PE=1 SV=1	ZC3HE_HUMAN	ZC3H14	83 kDa		0	1	1	0						axon cytoplasm, dendrite cytoplasm				nucleolus				nucleolus
Zinc finger homeobox protein 4 OS=Homo sapiens OX=9606 GN=ZFHX4 PE=1 SV=1	ZFHX4_HUMAN	ZFHX4	394 kDa		0	1	0	2
Zinc finger FYVE domain-containing protein 9 OS=Homo sapiens OX=9606 GN=ZFYVE9 PE=1 SV=2	ZFYV9_HUMAN	ZFYVE9	156 kDa		0	0	0	0
Zinc finger MYM-type protein 3 OS=Homo sapiens OX=9606 GN=ZMYM3 PE=1 SV=2	ZMYM3_HUMAN	ZMYM3	152 kDa		1	0	1	1
Zinc finger protein 236 OS=Homo sapiens OX=9606 GN=ZNF236 PE=2 SV=2	ZN236_HUMAN	ZNF236	204 kDa		2	0	0	0
Zinc finger protein 428 OS=Homo sapiens OX=9606 GN=ZNF428 PE=1 SV=2	ZN428_HUMAN	ZNF428	20 kDa		1	0	1	0
Zinc finger protein 501 OS=Homo sapiens OX=9606 GN=ZNF501 PE=2 SV=2	ZN501_HUMAN	ZNF501	31 kDa		0	1	1	1
Zinc finger protein 638 OS=Homo sapiens OX=9606 GN=ZNF638 PE=1 SV=2	ZN638_HUMAN	ZNF638	221 kDa		2	1	1	1
Zinc finger protein 667 OS=Homo sapiens OX=9606 GN=ZNF667 PE=2 SV=2	ZN667_HUMAN	ZNF667	70 kDa		0	0	2	0
Zinc finger protein 781 OS=Homo sapiens OX=9606 GN=ZNF781 PE=2 SV=1	ZN781_HUMAN	ZNF781	42 kDa		1	0	0	0

## Sheet: Proteomics reporting details
Peak List Generator: unknown												DATABASE SEARCHING-Charge state deconvolution and deisotoping were not performed.
	Version: unknown											All MS/MS samples were analyzed using Mascot (Matrix Science, London, UK; version
	Charge States Calculated: unknown											Mascot in Proteome Discoverer 2.2.0.388) and Sequest (XCorr Only) (Thermo Fisher
	Deisotoped: unknown											Scientific, San Jose, CA, USA; version IseNode in Proteome Discoverer
	Textual Annotation: unknown											2.2.0.388). Mascot was set up to search HUMANsp201805 (unknown version, 0
Database Set: 2 Databases												entries) assuming the digestion enzyme trypsin. Sequest (XCorr Only) was set up
	Database Name: HUMANsp201805											to search Uniprot_Swissprot_HomoSapiens_Jun2018.fasta (20293
		Version: unknown										entries) also assuming trypsin. Mascot and Sequest (XCorr Only) were searched
		Taxonomy: All Entries										with a fragment ion mass tolerance of 0.60 Da and a parent ion tolerance of 10.0
		Number of Proteins: 0										PPM. Carbamidomethyl of cysteine was specified in Mascot and Sequest (XCorr
	Database Name: Uniprot_Swissprot_HomoSapiens_Jun2018.fasta											Only) as a fixed modification. Oxidation of methionine was specified in Mascot
		Version: unknown										and Sequest (XCorr Only) as a variable modification.
		Taxonomy: All Entries
		Number of Proteins: 20293										CRITERIA FOR PROTEIN IDENTIFICATION-- Scaffold (version Scaffold_5.0.0, Proteome
		Explain Database w/ < 1000 entries:										Software Inc., Portland, OR) was used to validate MS/MS based peptide and
		Does database contain common contaminants?: unknown										protein identifications. Peptide identifications were accepted if they could be
Search Engine Set: 2 Search Engines												established at greater than 0.0% probability by the Peptide Prophet algorithm
	Search Engine: Mascot											(Keller, A et al Anal. Chem. 2002;74(20):5383-92) with Scaffold delta-mass
		Version: Mascot in Proteome Discoverer 2.2.0.388										correction. Protein identifications were accepted if they could be established
		Samples: All Samples										at greater than 95.0% probability and contained at least 1 identified peptide.
		Fragment Tolerance: 0.60 Da (Monoisotopic)										Protein probabilities were assigned by the Protein Prophet algorithm
		Parent Tolerance: 10.0 PPM (Monoisotopic)										(Nesvizhskii, Al et al Anal. Chem. 2003;75(17):4646-58). Proteins that contained
		Fixed Modifications: +57 on C (Carbamidomethyl)										similar peptides and could not be differentiated based on MS/MS analysis alone
		Variable Modifications: +16 on M (Oxidation)										were grouped to satisfy the principles of parsimony. Proteins sharing
		Database: HUMANsp201805 (unknown version, 0 entries)										significant peptide evidence were grouped into clusters.Proteins were annotated
		Digestion Enzyme: Trypsin										with GO terms from NCBI (downloaded 26-Jun-2019). (Ashburner, M et al Nat.
		Max Missed Cleavages: 2										Genet. 2000;25(1):25-9).
		Probability Model:
			PR532_CL1_1_1_RR: Peptide Prophet with Delta Mass Correction (No decoys found) [all charge states]
			PR532_CL1_2_2_RR: Peptide Prophet with Delta Mass Correction (No decoys found) [all charge states]
			PR532_CL1_3_3_RR: Peptide Prophet with Delta Mass Correction (No decoys found) [all charge states]
			PR532_CL1_4_4_RR: Peptide Prophet with Delta Mass Correction (No decoys found) [all charge states]
Search Engine: Sequest (XCorr Only)
	Version: IseNode in Proteome Discoverer 2.2.0.388
	Samples: All Samples
	Fragment Tolerance: 0.60 Da (Monoisotopic)
	Parent Tolerance: 10.0 PPM (Monoisotopic)
	Fixed Modifications: +57 on C (Carbamidomethyl)
	Variable Modifications: +16 on M (Oxidation)
	Database: Uniprot_Swissprot_HomoSapiens_Jun2018.fasta (unknown version, 20293 entries)
	Digestion Enzyme: Trypsin
	Max Missed Cleavages: 2
	Probability Model:
		PR532_CL1_1_1_RR: Peptide Prophet with Delta Mass Correction (No decoys found) [all charge states]
		PR532_CL1_2_2_RR: Peptide Prophet with Delta Mass Correction (No decoys found) [all charge states]
		PR532_CL1_3_3_RR: Peptide Prophet with Delta Mass Correction (No decoys found) [all charge states]
		PR532_CL1_4_4_RR: Peptide Prophet with Delta Mass Correction (No decoys found) [all charge states]
Scaffold: Version: Scaffold_5.0.0
	Modification Metadata Set: 2334 modifications
		Source: C:\Program Files\Scaffold 4\parameters\unimod.xml
		Comment:
	Protein Grouping Strategy: Experiment-wide grouping with protein cluster analysis
	Peptide Thresholds: 0.0% minimum
	Protein Thresholds: 95.0% minimum and 1 peptide minimum
	Peptide FDR: 60.6% (Prophet)
	Protein FDR: 2.5% (Prophet)
	GO Annotation Source(s): NCBI (downloaded 26-Jun-2019)
	Pathway Annotation Source(s): Unknown
	Alternate ID Source(s): FASTA:UniProt/Swiss-Prot (UniProtKB)
