# Supplementary material for: Nuclear fascin regulates cancer cell survival
Source: eLife. 2022 Aug 30;11:e79283. doi: 10.7554/eLife.79283 (PMC9427113; doi:10.7554/eLife.79283)
Supplement: Figure 6—source data 1. [file elife-79283-fig6-data1.xlsx]

## Sheet: Results
Key
Controls or compounds with activity <30%
Compounds with activity ≥30%
Hit compounds with activity ≥30% selected for compound response follow-up screen
Well Info			Compound Properties							Fascin +ve - % Nuclear fascin - Normalised mean per well
Plate ID	Row	Column	Compound ID	Compound Name	Gene Target Name	EGID	Activity (-log[M])	Conc. [μM]	Well Type	Corrected
1093713839	I	13	SN1048123378	AZ13788454	CDK7	1022	8.49	5	Compound	430.605
1093711675	G	17	SN1004137742	AZ10786829	RXFP3	51289	7.03	5	Compound	362.222
1093711538	F	8	SN1034368015	AZ13438308	EGFR	1956	9.16	5	Compound	315.138
1093713907	L	4	SN1075293407	AZ12599689	ITGA5	3678	9.51	5	Compound	308.661
1093711682	N	19	SN1034372483	AZ13550874	EGFR	1956	8.05	5	Compound	267.464
1093711736	J	19	SN1031657750	AZ13285065	SYK	6850	9.06	5	Compound	256.036
1093711705	B	16	SN1000620495	AZ13079215	AXL	558	9.51	5	Compound	240.13
1093711460	M	5	SN1041214976	AZ12100508	KIF11	3832	8.48	5	Compound	185.291
1093711729	H	16	SN1000651298	AZ10846096	ESR1	2099	5.46	5	Compound	175.413
1093711712	L	10	SN1151669528	AZ14132192	GSG2	83903	8.7	5	Compound	173.869
1093711729	B	9	SN0039287398	AZ10286059	ND2	4536	7.3	5	Compound	165.012
1093713778	F	7	SN1001426888	AZ13217030	DNAH8	1769	6.63	5	Compound	162.928
1093711675	K	15	SN0039332470	AZ10291917	PTPRC	5788	6.1	5	Compound	154.239
1093711736	C	15	SN1060433305	AZ14115914	KCNH2	3757	5.6	5	Compound	153.278
1093711538	L	11	SN1061309180	AZ12127481	NR1H4	9971	7.75	5	Compound	146.209
1093713860	K	15	SN1035267590	AZ13455821	EGFR	1956	9.46	5	Compound	146.086
1093711668	I	13	SN1077554078	AZ12886917	AXL	558	10	5	Compound	140.697
1093711484	F	10	SN1068078978	AZ12692845	ABCB1	5243	8	5	Compound	139.905
1093711606	K	20	SN0199185780	AZ11944848	DNAH8	1769	5.47	5	Compound	136.665
1093713891	B	13	SN1045926381	AZ12205430	KIF11	3832	9.46	5	Compound	136.201
1093713860	B	3							Stimulator Control	135.919
1093711675	N	13							Stimulator Control	132.25
1093713884	L	8							Stimulator Control	132.066
1093711675	O	3							Stimulator Control	130.439
1093711491	B	4	SN1078379622	AZ12580005	GSK3B	2932	10	5	Compound	129.914
1093713846	L	8							Stimulator Control	128.794
1093713839	L	8							Stimulator Control	127.909
1093711729	O	3							Stimulator Control	127.692
1093711682	H	5							Stimulator Control	127.589
1093711668	O	3							Stimulator Control	126.929
1093713884	J	11	SN1058172983	AZ13850972	KHK	3795	8.7	5	Compound	126.623
1093711743	O	23							Stimulator Control	125.954
1093711576	B	3							Stimulator Control	125.685
1093713860	L	8							Stimulator Control	125.679
1093711439	B	3							Stimulator Control	125.406
1093711699	B	3							Stimulator Control	125.121
1093711460	O	3							Stimulator Control	124.74
1093711736	K	14	SN1086696262	AZ12924800	RET	5979	9.83	5	Compound	124.626
1093713914	O	3							Stimulator Control	124.581
1093713914	H	5							Stimulator Control	124.273
1093711538	H	5							Stimulator Control	123.798
1093713884	B	3							Stimulator Control	123.728
1093711675	H	21							Stimulator Control	123.512
1093711545	H	5							Stimulator Control	123.477
1093713907	G	18	SN0187895347	AZ11566303	SYK	6850	9.4	5	Compound	122.997
1093713808	E	18							Stimulator Control	122.809
1093713884	H	5							Stimulator Control	122.775
1093713877	O	3							Stimulator Control	122.541
1093711439	L	8							Stimulator Control	122.146
1093711477	B	23							Stimulator Control	121.965
1093711453	B	3							Stimulator Control	121.702
1093711484	B	23							Stimulator Control	121.279
1093711552	B	3							Stimulator Control	121.241
1093711712	O	5	SN1068078950	AZ12632396	KPNB1	3837	8.04	5	Compound	121.216
1093711392	O	3							Stimulator Control	120.96
1093711620	N	13							Stimulator Control	120.833
1093711736	B	3							Stimulator Control	120.668
1093711576	F	13	SN0153356546	AZ10223729	ADRA2C	152	7.55	5	Compound	120.458
1093713815	L	18							Stimulator Control	120.156
1093711453	H	5							Stimulator Control	120.097
1093711743	B	23							Stimulator Control	120.032
1093711521	E	18							Stimulator Control	119.873
1093711682	L	8							Stimulator Control	119.662
1093711521	O	21	SN1014828203	AZ12600034	NTRK1	4914	9.62	5	Compound	119.637
1093713907	H	5							Stimulator Control	119.353
1093713884	H	21							Stimulator Control	119.046
1093711538	O	3							Stimulator Control	118.946
1093711491	E	18							Stimulator Control	118.759
1093711477	L	8							Stimulator Control	118.657
1093711385	O	3							Stimulator Control	118.618
1093711590	B	23							Stimulator Control	118.527
1093711644	E	18							Stimulator Control	118.179
1093711590	H	5							Stimulator Control	118.165
1093711712	H	21							Stimulator Control	118.043
1093711675	O	23							Stimulator Control	117.658
1093713860	B	23							Stimulator Control	117.389
1093711392	B	3							Stimulator Control	117.348
1093711675	B	3							Stimulator Control	117.257
1093713846	L	18							Stimulator Control	117.093
1093713853	L	18							Stimulator Control	116.979
1093711415	E	8							Stimulator Control	116.902
1093711705	H	5							Stimulator Control	116.901
1093711729	L	18							Stimulator Control	116.703
1093711422	H	13							Stimulator Control	116.449
1093711446	H	5							Stimulator Control	116.197
1093713822	N	13							Stimulator Control	115.942
1093713853	O	3							Stimulator Control	115.897
1093711637	B	3							Stimulator Control	115.761
1093711699	N	16	SN1059174821	AZ12530206	CDK2	1017	8.45	5	Compound	115.673
1093713860	H	21							Stimulator Control	115.667
1093713891	H	5							Stimulator Control	115.552
1093711392	N	13							Stimulator Control	115.171
1093711422	O	3							Stimulator Control	115.144
1093713808	N	13							Stimulator Control	114.811
1093711415	E	18							Stimulator Control	114.638
1093711736	M	20	SN1051760333	AZ13812446	ATR	545	9.7	5	Compound	114.558
1093713778	B	3							Stimulator Control	114.527
1093711453	L	18							Stimulator Control	114.253
1093713822	L	8							Stimulator Control	114.21
1093711705	B	3							Stimulator Control	114.191
1093711668	B	3							Stimulator Control	114.169
1093711644	N	13							Stimulator Control	114.163
1093711736	N	10	SN1060843667	AZ12552389	ITGA5	3678	9.52	5	Compound	114.039
1093713877	B	23							Stimulator Control	113.942
1093711606	O	3							Stimulator Control	113.897
1093711682	B	3							Stimulator Control	113.753
1093711446	B	3							Stimulator Control	113.748
1093711491	B	23							Stimulator Control	113.535
1093711637	L	18							Stimulator Control	113.535
1093711569	O	3							Stimulator Control	113.524
1093711576	H	21							Stimulator Control	113.412
1093711743	O	3							Stimulator Control	113.394
1093711613	O	23							Stimulator Control	113.362
1093713822	H	5							Stimulator Control	113.272
1093713884	B	23							Stimulator Control	113.221
1093711422	N	13							Stimulator Control	113.095
1093713846	O	3							Stimulator Control	113.026
1093713877	C	13							Stimulator Control	112.983
1093711491	O	3							Stimulator Control	112.921
1093711736	N	22	SN1074457389	AZ12823764	SRC	6714	9.13	5	Compound	112.914
1093711415	N	13							Stimulator Control	112.855
1093711590	C	13							Stimulator Control	112.81
1093711392	C	13							Stimulator Control	112.796
1093711705	F	13	SN0206542652	AZ10673642	IDH1	3417	6.44	5	Compound	112.75
1093713907	B	3							Stimulator Control	112.745
1093711477	B	3							Stimulator Control	112.552
1093711682	B	23							Stimulator Control	112.518
1093711552	E	18							Stimulator Control	112.493
1093711675	H	5							Stimulator Control	112.396
1093711385	L	18							Stimulator Control	112.381
1093711538	L	18							Stimulator Control	112.31
1093711545	O	3							Stimulator Control	112.266
1093711446	N	3	SN1151667669	AZ14132158	N/A	N/A	N/A	5	Compound	112.1
1093711460	B	3							Stimulator Control	112.088
1093711743	L	8							Stimulator Control	112.057
1093711439	B	23							Stimulator Control	111.711
1093711729	N	13							Stimulator Control	111.691
1093713891	B	3							Stimulator Control	111.661
1093711712	B	23							Stimulator Control	111.638
1093713839	O	3							Stimulator Control	111.567
1093711408	B	3							Stimulator Control	111.474
1093713822	E	18							Stimulator Control	111.463
1093711705	O	3							Stimulator Control	111.358
1093713884	O	3							Stimulator Control	111.335
1093713815	H	5							Stimulator Control	111.287
1093713853	L	8							Stimulator Control	110.937
1093711712	B	3							Stimulator Control	110.85
1093711545	B	3							Stimulator Control	110.84
1093711408	O	3							Stimulator Control	110.71
1093713846	C	4	SN1123541268	AZ13783954	KCNH2	3757	4.5	5	Compound	110.669
1093713860	O	3							Stimulator Control	110.6
1093711606	B	23							Stimulator Control	110.561
1093713907	C	13							Stimulator Control	110.181
1093713914	L	8							Stimulator Control	110.178
1093711521	H	13							Stimulator Control	110.172
1093711569	B	3							Stimulator Control	110.066
1093711392	H	13							Stimulator Control	110.066
1093713808	O	23							Stimulator Control	109.946
1093711644	H	5							Stimulator Control	109.794
1093711453	L	8							Stimulator Control	109.597
1093713815	H	21							Stimulator Control	109.574
1093713853	E	18							Stimulator Control	109.45
1093711446	O	3							Stimulator Control	109.379
1093713839	H	13							Stimulator Control	109.349
1093711422	B	23							Stimulator Control	109.213
1093711514	B	3							Stimulator Control	109.194
1093711613	B	3							Stimulator Control	109.191
1093711484	L	8							Stimulator Control	108.993
1093713853	O	23							Stimulator Control	108.991
1093711668	L	8							Stimulator Control	108.972
1093711590	N	13							Stimulator Control	108.97
1093711415	H	13							Stimulator Control	108.892
1093711606	E	8							Stimulator Control	108.873
1093711521	L	8							Stimulator Control	108.781
1093711569	E	18							Stimulator Control	108.64
1093711415	B	23							Stimulator Control	108.593
1093713846	H	5							Stimulator Control	108.551
1093711743	B	3							Stimulator Control	108.532
1093711705	L	8							Stimulator Control	108.504
1093711590	B	3							Stimulator Control	108.502
1093711613	L	18							Stimulator Control	108.473
1093711576	O	3							Stimulator Control	108.468
1093711408	L	18							Stimulator Control	108.418
1093713822	B	3							Stimulator Control	108.341
1093711682	H	21							Stimulator Control	108.301
1093713860	H	5							Stimulator Control	108.3
1093711484	O	23							Stimulator Control	108.238
1093713778	L	8							Stimulator Control	108.216
1093711538	B	23							Stimulator Control	108.179
1093711477	H	13							Stimulator Control	108.172
1093713839	N	13							Stimulator Control	108.081
1093711750	N	13							Stimulator Control	108.054
1093711613	O	3							Stimulator Control	107.997
1093711736	L	18							Stimulator Control	107.889
1093711446	H	19	SN0214392694	AZ10249188	S1PR2	9294	6.47	5	Compound	107.829
1093711392	L	18							Stimulator Control	107.825
1093711576	E	18							Stimulator Control	107.726
1093713907	L	8							Stimulator Control	107.599
1093711521	L	18							Stimulator Control	107.576
1093711552	H	13							Stimulator Control	107.551
1093711514	H	13							Stimulator Control	107.399
1093713822	E	8							Stimulator Control	107.304
1093711576	L	18							Stimulator Control	107.297
1093711491	B	3							Stimulator Control	107.228
1093711729	B	3							Stimulator Control	107.104
1093711446	N	13							Stimulator Control	107.017
1093711569	M	16	SN1140236737	AZ14105896	FLT3	2322	9.7	5	Compound	106.928
1093713808	H	5							Stimulator Control	106.878
1093711385	B	3							Stimulator Control	106.804
1093711606	N	13							Stimulator Control	106.754
1093711712	O	3							Stimulator Control	106.636
1093713914	N	13							Stimulator Control	106.629
1093711460	L	18							Stimulator Control	106.581
1093711736	L	8							Stimulator Control	106.449
1093711514	O	3							Stimulator Control	106.421
1093711514	H	21							Stimulator Control	106.333
1093711620	O	3							Stimulator Control	106.317
1093711651	L	8							Stimulator Control	105.887
1093711484	B	3							Stimulator Control	105.868
1093711699	O	23							Stimulator Control	105.857
1093711668	H	5							Stimulator Control	105.769
1093711699	E	18							Stimulator Control	105.719
1093713891	O	3							Stimulator Control	105.682
1093711651	N	13							Stimulator Control	105.651
1093711750	H	13							Stimulator Control	105.643
1093711699	L	18							Stimulator Control	105.636
1093711385	N	13							Stimulator Control	105.619
1093711507	L	8							Stimulator Control	105.607
1093713914	B	3							Stimulator Control	105.568
1093711545	H	13							Stimulator Control	105.548
1093711620	L	18							Stimulator Control	105.535
1093711736	H	21							Stimulator Control	105.402
1093713877	E	4	SN1123536366	AZ13783735	DNAH8	1769	7.44	5	Compound	105.367
1093713808	B	3							Stimulator Control	105.347
1093711651	O	3							Stimulator Control	105.305
1093713853	B	3							Stimulator Control	105.22
1093711590	O	23							Stimulator Control	105.205
1093713907	H	21							Stimulator Control	105.162
1093711453	N	13							Stimulator Control	105.091
1093711705	L	18							Stimulator Control	104.968
1093713815	H	13							Stimulator Control	104.926
1093713877	L	8							Stimulator Control	104.913
1093711477	H	5							Stimulator Control	104.911
1093711613	N	13							Stimulator Control	104.905
1093713778	H	5							Stimulator Control	104.903
1093713877	O	23							Stimulator Control	104.881
1093711507	E	8							Stimulator Control	104.877
1093713907	E	8							Stimulator Control	104.864
1093713778	O	23							Stimulator Control	104.827
1093711446	L	8							Stimulator Control	104.793
1093711750	H	21							Stimulator Control	104.773
1093711484	E	18							Stimulator Control	104.747
1093713808	L	8							Stimulator Control	104.707
1093711491	L	18							Stimulator Control	104.516
1093711415	O	3							Stimulator Control	104.418
1093711750	E	8							Stimulator Control	104.418
1093711750	B	3							Stimulator Control	104.399
1093711484	O	3							Stimulator Control	104.308
1093711538	L	8							Stimulator Control	104.26
1093711439	H	21							Stimulator Control	104.196
1093711705	H	21							Stimulator Control	104.183
1093713778	O	3							Stimulator Control	104.143
1093711385	C	13							Stimulator Control	104.028
1093711576	O	23							Stimulator Control	103.985
1093711439	E	8							Stimulator Control	103.981
1093711699	E	8							Stimulator Control	103.947
1093711668	B	23							Stimulator Control	103.934
1093711651	H	5							Stimulator Control	103.915
1093711538	E	18							Stimulator Control	103.842
1093711606	O	23							Stimulator Control	103.814
1093711422	B	3							Stimulator Control	103.778
1093711613	B	23							Stimulator Control	103.62
1093711439	O	3							Stimulator Control	103.571
1093711477	L	18							Stimulator Control	103.511
1093711552	O	3							Stimulator Control	103.498
1093711453	E	18							Stimulator Control	103.44
1093711644	O	23							Stimulator Control	103.434
1093711552	C	13							Stimulator Control	103.258
1093711736	H	5							Stimulator Control	103.191
1093711651	B	3							Stimulator Control	103.168
1093711682	C	13							Stimulator Control	103.158
1093711729	H	21							Stimulator Control	103.077
1093713891	H	21							Stimulator Control	103.044
1093713839	H	21							Stimulator Control	102.958
1093711460	E	8							Stimulator Control	102.932
1093713877	B	3							Stimulator Control	102.886
1093711637	H	21							Stimulator Control	102.864
1093711507	O	3							Stimulator Control	102.856
1093711446	H	13							Stimulator Control	102.779
1093711507	B	23							Stimulator Control	102.773
1093711736	O	23							Stimulator Control	102.66
1093711569	N	13							Stimulator Control	102.577
1093711712	O	23							Stimulator Control	102.571
1093713891	E	18							Stimulator Control	102.544
1093711545	L	8							Stimulator Control	102.45
1093713815	N	13							Stimulator Control	102.447
1093711507	O	23							Stimulator Control	102.423
1093711644	B	23							Stimulator Control	102.406
1093713914	O	23							Stimulator Control	102.298
1093711750	B	23							Stimulator Control	102.242
1093711729	O	23							Stimulator Control	102.193
1093711620	L	8							Stimulator Control	102.19
1093711460	L	8							Stimulator Control	102.093
1093711521	N	13							Stimulator Control	102.065
1093711637	O	23							Stimulator Control	101.976
1093713778	N	13							Stimulator Control	101.957
1093711620	E	18							Stimulator Control	101.951
1093711637	B	23							Stimulator Control	101.923
1093713877	J	8	SN1070379479	AZ12740033	NTRK1	4914	9.4	5	Compound	101.879
1093711668	N	13							Stimulator Control	101.827
1093711385	E	8							Stimulator Control	101.82
1093711569	C	13							Stimulator Control	101.714
1093713815	C	13							Stimulator Control	101.711
1093711712	H	5							Stimulator Control	101.71
1093711637	E	8							Stimulator Control	101.524
1093713846	E	8							Stimulator Control	101.467
1093711507	N	13							Stimulator Control	101.453
1093713891	L	8							Stimulator Control	101.402
1093711552	L	8							Stimulator Control	101.381
1093711460	C	13							Stimulator Control	101.184
1093711491	H	5							Stimulator Control	101.102
1093711743	N	13							Stimulator Control	100.988
1093711408	H	5							Stimulator Control	100.944
1093711408	L	8							Stimulator Control	100.913
1093711620	B	3							Stimulator Control	100.815
1093711408	N	13							Stimulator Control	100.717
1093711514	L	18							Stimulator Control	100.637
1093711514	B	23							Stimulator Control	100.596
1093711521	B	23							Stimulator Control	100.528
1093711699	O	3							Stimulator Control	100.48
1093713839	H	5							Stimulator Control	100.468
1093711606	E	18							Stimulator Control	100.449
1093711545	E	18							Stimulator Control	100.317
1093711644	L	18							Stimulator Control	100.141
1093711569	H	13							Stimulator Control	100.101
1093713846	H	13							Stimulator Control	100.074
1093711651	E	18							Stimulator Control	100.039
1093711422	H	5							Stimulator Control	100.007
1093711712	C	13							Stimulator Control	100
1093713846	H	21							Stimulator Control	100
1093711675	H	13							Stimulator Control	100
1093711729	C	13							Stimulator Control	100
1093711682	O	3							Stimulator Control	100
1093711736	N	13							Stimulator Control	100
1093711651	C	13							Stimulator Control	100
1093711668	O	23							Stimulator Control	100
1093711606	H	5							Stimulator Control	100
1093711590	E	18							Stimulator Control	100
1093711743	H	21							Stimulator Control	100
1093711637	H	5							Stimulator Control	100
1093711644	C	13							Stimulator Control	100
1093713839	E	8							Stimulator Control	100
1093711545	C	13							Stimulator Control	100
1093711491	C	13							Stimulator Control	100
1093711514	E	18							Stimulator Control	100
1093711507	C	13							Stimulator Control	100
1093711552	N	13							Stimulator Control	100
1093711576	B	23							Stimulator Control	100
1093711613	H	5							Stimulator Control	100
1093711620	O	23							Stimulator Control	100
1093711699	B	23							Stimulator Control	100
1093711705	C	13							Stimulator Control	100
1093711453	B	23							Stimulator Control	100
1093711569	L	18							Stimulator Control	100
1093711439	H	13							Stimulator Control	100
1093711385	B	23							Stimulator Control	100
1093713808	H	13							Stimulator Control	100
1093713914	H	13							Stimulator Control	100
1093713853	E	8							Stimulator Control	100
1093713860	E	8							Stimulator Control	100
1093711408	E	8							Stimulator Control	100
1093711415	O	23							Stimulator Control	100
1093711422	L	18							Stimulator Control	100
1093711484	H	13							Stimulator Control	100
1093711750	O	23							Stimulator Control	100
1093711446	O	23							Stimulator Control	100
1093713891	O	23							Stimulator Control	100
1093713884	C	13							Stimulator Control	100
1093713815	B	23							Stimulator Control	100
1093713877	L	18							Stimulator Control	100
1093713822	H	13							Stimulator Control	100
1093713778	E	18							Stimulator Control	100
1093713907	B	23							Stimulator Control	100
1093711521	O	23							Stimulator Control	100
1093711538	B	3							Stimulator Control	100
1093711392	B	23							Stimulator Control	100
1093711477	E	8							Stimulator Control	100
1093711460	N	13							Stimulator Control	100
1093711538	O	23							Stimulator Control	99.9861
1093711491	H	21							Stimulator Control	99.8928
1093711668	C	13							Stimulator Control	99.6386
1093711385	L	8							Stimulator Control	99.5034
1093711491	O	23							Stimulator Control	99.4576
1093711392	H	21							Stimulator Control	99.4575
1093711644	B	3							Stimulator Control	99.4491
1093713822	O	3							Stimulator Control	99.4026
1093711446	E	18							Stimulator Control	99.3417
1093713853	B	23							Stimulator Control	99.3067
1093711620	B	23							Stimulator Control	99.3045
1093711477	H	21							Stimulator Control	99.2567
1093711477	O	3							Stimulator Control	99.2086
1093711422	E	18							Stimulator Control	99.1946
1093711392	O	23							Stimulator Control	99.1643
1093711514	O	23							Stimulator Control	99.0592
1093711446	E	8							Stimulator Control	99.0093
1093711392	E	8							Stimulator Control	98.9791
1093711552	H	5							Stimulator Control	98.9641
1093713808	O	3							Stimulator Control	98.9234
1093711590	E	8							Stimulator Control	98.9188
1093713822	O	23							Stimulator Control	98.8831
1093711460	H	5							Stimulator Control	98.8699
1093711644	H	13							Stimulator Control	98.8672
1093711729	B	23							Stimulator Control	98.8473
1093713778	E	8							Stimulator Control	98.8441
1093711590	H	13							Stimulator Control	98.785
1093711507	H	13							Stimulator Control	98.7629
1093711415	B	3							Stimulator Control	98.6863
1093713839	C	13							Stimulator Control	98.6476
1093711491	L	8							Stimulator Control	98.5815
1093711446	L	18							Stimulator Control	98.5052
1093713860	L	18							Stimulator Control	98.5047
1093713860	H	13							Stimulator Control	98.4757
1093711712	L	8							Stimulator Control	98.4631
1093711590	O	3							Stimulator Control	98.458
1093713815	E	8							Stimulator Control	98.445
1093711613	E	18							Stimulator Control	98.2804
1093711750	E	18							Stimulator Control	98.192
1093711538	H	13							Stimulator Control	98.1875
1093713853	C	13							Stimulator Control	98.143
1093711538	C	13							Stimulator Control	97.9741
1093711668	H	13							Stimulator Control	97.8333
1093711590	H	21							Stimulator Control	97.8153
1093711521	H	5							Stimulator Control	97.7328
1093711705	B	23							Stimulator Control	97.6159
1093713914	L	18							Stimulator Control	97.6075
1093711422	O	23							Stimulator Control	97.533
1093713822	B	23							Stimulator Control	97.4085
1093711613	H	13							Stimulator Control	97.3903
1093711699	N	13							Stimulator Control	97.2119
1093711422	H	21							Stimulator Control	97.1777
1093711545	E	8							Stimulator Control	97.1696
1093711521	O	3							Stimulator Control	96.9875
1093711422	C	13							Stimulator Control	96.9625
1093713884	O	23							Stimulator Control	96.9092
1093711613	C	13							Stimulator Control	96.9061
1093711682	L	18							Stimulator Control	96.7912
1093713877	N	13							Stimulator Control	96.7425
1093711675	D	6	SN1073025569	AZ12792629	GSK3B	2932	9.69	5	Compound	96.6905
1093711576	H	5							Stimulator Control	96.5947
1093711477	H	18	SN1057152366	AZ13925670	RARA	5914	9.52	5	Compound	96.5857
1093711637	L	8							Stimulator Control	96.569
1093713860	O	23							Stimulator Control	96.4668
1093713808	B	23							Stimulator Control	96.4346
1093711729	L	8							Stimulator Control	96.3758
1093713853	H	5							Stimulator Control	96.3463
1093711392	E	18							Stimulator Control	96.3152
1093711415	H	5							Stimulator Control	96.2885
1093711606	B	3							Stimulator Control	96.2695
1093713907	O	3							Stimulator Control	96.1652
1093713877	H	5							Stimulator Control	96.1347
1093711668	H	21							Stimulator Control	96.1163
1093711651	F	21	SN1044003383	AZ13587878	NFE2L2	4780	7.22	5	Compound	96.1139
1093711408	H	21							Stimulator Control	96.0866
1093711552	O	23							Stimulator Control	96.0847
1093711750	L	18							Stimulator Control	95.9377
1093713877	H	13							Stimulator Control	95.899
1093711569	H	5							Stimulator Control	95.8733
1093711491	N	13							Stimulator Control	95.8012
1093711699	H	5							Stimulator Control	95.7889
1093711569	H	21							Stimulator Control	95.7542
1093711675	L	18							Stimulator Control	95.668
1093711453	O	23							Stimulator Control	95.618
1093713914	E	18							Stimulator Control	95.6154
1093711453	I	2	SN1034370539	AZ13466517	EGFR	1956	9.76	5	Compound	95.5789
1093711750	L	8							Stimulator Control	95.5622
1093711408	H	13							Stimulator Control	95.4503
1093711705	N	13							Stimulator Control	95.4344
1093711736	E	8							Stimulator Control	95.3976
1093711743	H	5							Stimulator Control	95.3412
1093711446	B	23							Stimulator Control	95.334
1093713846	O	23							Stimulator Control	95.3053
1093713877	E	8							Stimulator Control	95.233
1093713822	H	21							Stimulator Control	95.2004
1093711590	L	18							Stimulator Control	95.1445
1093711590	L	8							Stimulator Control	95.1169
1093713839	E	18							Stimulator Control	95.0785
1093711507	E	18							Stimulator Control	95.0262
1093713815	O	3							Stimulator Control	95.0039
1093711576	C	13							Stimulator Control	94.9529
1093711484	N	13							Stimulator Control	94.9268
1093711408	B	23							Stimulator Control	94.9165
1093713860	E	18							Stimulator Control	94.6549
1093711736	E	16	SN1063136742	AZ12600032	NTRK1	4914	9.62	5	Compound	94.6252
1093711507	H	5							Stimulator Control	94.5701
1093711675	L	8							Stimulator Control	94.5693
1093711651	E	8							Stimulator Control	94.529
1093711644	O	3							Stimulator Control	94.4333
1093711750	C	13							Stimulator Control	94.3439
1093711569	O	23							Stimulator Control	94.333
1093711613	H	21							Stimulator Control	94.2708
1093711514	L	8							Stimulator Control	94.236
1093713914	B	23							Stimulator Control	94.1775
1093713877	H	21							Stimulator Control	94.1589
1093713815	B	3							Stimulator Control	94.1369
1093711484	E	8							Stimulator Control	94.1325
1093711736	C	13							Stimulator Control	94.1033
1093713907	H	13							Stimulator Control	94.052
1093711392	H	5							Stimulator Control	94.0488
1093711675	B	23							Stimulator Control	93.9902
1093711439	O	23							Stimulator Control	93.9693
1093713853	H	21							Stimulator Control	93.8883
1093711439	N	13							Stimulator Control	93.8498
1093711491	E	8							Stimulator Control	93.7441
1093711743	H	13							Stimulator Control	93.6955
1093711637	N	13							Stimulator Control	93.6723
1093711606	L	8							Stimulator Control	93.5736
1093713891	B	23							Stimulator Control	93.5113
1093711385	H	21							Stimulator Control	93.3141
1093713891	L	18							Stimulator Control	93.2796
1093711415	C	13							Stimulator Control	93.2187
1093711576	E	8							Stimulator Control	93.1419
1093713884	L	18							Stimulator Control	93.0984
1093711743	C	13							Stimulator Control	92.9681
1093711446	C	13							Stimulator Control	92.9621
1093713891	N	13							Stimulator Control	92.8095
1093711545	O	23							Stimulator Control	92.7943
1093711743	E	8							Stimulator Control	92.7922
1093711651	H	21							Stimulator Control	92.7864
1093711699	H	13							Stimulator Control	92.7625
1093713808	E	8							Stimulator Control	92.7433
1093711651	O	23							Stimulator Control	92.7187
1093711507	B	3							Stimulator Control	92.6604
1093711521	B	3							Stimulator Control	92.6381
1093713808	C	13							Stimulator Control	92.6339
1093711460	B	23							Stimulator Control	92.6136
1093711422	E	8							Stimulator Control	92.5948
1093711446	H	21							Stimulator Control	92.5893
1093713846	E	18							Stimulator Control	92.5837
1093711453	O	3							Stimulator Control	92.5558
1093711682	O	23							Stimulator Control	92.5249
1093711538	H	21							Stimulator Control	92.4509
1093711460	O	23							Stimulator Control	92.3945
1093711552	E	8							Stimulator Control	92.2681
1093711620	H	5							Stimulator Control	92.2499
1093711576	H	13							Stimulator Control	92.2481
1093713884	E	8							Stimulator Control	92.2199
1093711439	C	13							Stimulator Control	92.1894
1093713822	C	13							Stimulator Control	92.1553
1093711514	N	13							Stimulator Control	92.0979
1093711408	O	23							Stimulator Control	92.0904
1093711651	L	18							Stimulator Control	91.8546
1093711385	O	23							Stimulator Control	91.7561
1093713846	B	23							Stimulator Control	91.7191
1093711668	E	8							Stimulator Control	91.6515
1093711521	H	21							Stimulator Control	91.5659
1093713846	C	13							Stimulator Control	91.5611
1093711736	B	23							Stimulator Control	91.4802
1093711613	L	8							Stimulator Control	91.4605
1093711439	L	18							Stimulator Control	91.42
1093711712	N	13							Stimulator Control	91.4159
1093711729	H	5							Stimulator Control	91.3656
1093713846	B	3							Stimulator Control	91.3205
1093711712	L	18							Stimulator Control	91.2124
1093711729	H	13							Stimulator Control	91.0999
1093711576	N	13							Stimulator Control	91.0939
1093711484	H	5							Stimulator Control	91.0304
1093711408	M	11	SN1058034766	AZ12508403	CDK2	1017	8.52	5	Compound	90.9579
1093713778	C	13							Stimulator Control	90.8744
1093713853	N	13							Stimulator Control	90.8344
1093711736	H	13							Stimulator Control	90.7681
1093711682	E	8							Stimulator Control	90.735
1093711637	E	18							Stimulator Control	90.6906
1093713877	D	18	SN1056154075	AZ13827220	CDK7	1022	8.34	5	Compound	90.6343
1093711699	L	8							Stimulator Control	90.6183
1093711392	L	8							Stimulator Control	90.59
1093711729	E	18							Stimulator Control	90.5021
1093711699	C	13							Stimulator Control	90.3979
1093711460	H	21							Stimulator Control	90.2236
1093711415	L	8							Stimulator Control	90.0258
1093713778	H	13							Stimulator Control	90.0024
1093711538	N	13							Stimulator Control	89.984
1093711538	E	8							Stimulator Control	89.9097
1093711460	L	9	SN1089541426	AZ13134778	IDH1	3417	8.14	5	Compound	89.8995
1093711644	H	21							Stimulator Control	89.8807
1093713839	O	4	SN1068383166	AZ12698598	RET	5979	9.32	5	Compound	89.861
1093711453	H	13							Stimulator Control	89.8298
1093711408	E	18							Stimulator Control	89.7676
1093711415	L	18							Stimulator Control	89.7308
1093711675	C	17	SN1033655266	AZ13458330	DYRK3	8444	8.53	5	Compound	89.4359
1093711682	E	18							Stimulator Control	89.4078
1093711736	O	3							Stimulator Control	89.2759
1093711514	E	8							Stimulator Control	89.2474
1093713860	C	13							Stimulator Control	89.2133
1093711453	I	17	SN1110326954	AZ13719273	CCNB1	891	7.52	5	Compound	89.203
1093711552	L	18							Stimulator Control	89.122
1093711545	N	13							Stimulator Control	89.0592
1093711613	E	8							Stimulator Control	89.04
1093711439	H	5							Stimulator Control	88.9938
1093713914	K	20	SN1080489650	AZ12794316	AXL	558	9.05	5	Compound	88.9764
1093711569	L	8							Stimulator Control	88.9418
1093713839	L	18							Stimulator Control	88.8869
1093711682	H	13							Stimulator Control	88.732
1093713815	L	8							Stimulator Control	88.5595
1093711712	E	8							Stimulator Control	88.5563
1093713907	L	18							Stimulator Control	88.5255
1093711514	C	13							Stimulator Control	88.4679
1093711750	H	5							Stimulator Control	88.4197
1093711729	E	8							Stimulator Control	88.414
1093711675	E	18							Stimulator Control	88.3398
1093711460	E	18							Stimulator Control	88.2848
1093711729	D	11	SN0024812931	AZ11717072	N/A	N/A	N/A	5	Compound	88.2597
1093711637	O	3							Stimulator Control	88.0682
1093711743	L	18							Stimulator Control	87.7735
1093713884	F	16	SN0185717431	AZ10416131	CCNE1	898	7.82	5	Compound	87.7409
1093711514	H	5							Stimulator Control	87.7307
1093711439	M	5	SN1110325647	AZ13719191	CCNT1	904	7.59	5	Compound	87.6813
1093711668	E	18							Stimulator Control	87.6803
1093711637	D	3	SN1106277088	AZ13632889	FZD8	8325	7.3	5	Compound	87.6769
1093711637	C	13							Stimulator Control	87.5866
1093711460	H	13							Stimulator Control	87.524
1093713877	E	18							Stimulator Control	87.4875
1093711620	H	13							Stimulator Control	87.4146
1093711507	H	21							Stimulator Control	87.3383
1093711422	L	8							Stimulator Control	87.2053
1093711620	C	13							Stimulator Control	87.2035
1093711651	B	23							Stimulator Control	87.1017
1093713839	B	23							Stimulator Control	86.9355
1093711576	J	6	SN0032100754	AZ10011760	CES1	1066	7.8	5	Compound	86.9258
1093713860	N	13							Stimulator Control	86.7588
1093711668	L	18							Stimulator Control	86.5887
1093713891	C	13							Stimulator Control	86.4984
1093711545	L	18							Stimulator Control	86.4384
1093711675	C	13							Stimulator Control	86.3873
1093711750	O	3							Stimulator Control	86.3352
1093711415	H	21							Stimulator Control	86.2377
1093711484	C	13							Stimulator Control	86.2228
1093711682	N	13							Stimulator Control	85.8214
1093711484	L	18							Stimulator Control	85.7938
1093711507	L	18							Stimulator Control	85.5682
1093713839	B	3							Stimulator Control	85.5055
1093711644	L	8							Stimulator Control	85.3754
1093711569	B	23							Stimulator Control	85.3664
1093713839	J	10	SN0013947426	AZ10117043	ATP1B3	483	7.93	5	Compound	85.2889
1093713815	O	23							Stimulator Control	85.181
1093713846	N	13							Stimulator Control	85.1339
1093711552	B	23							Stimulator Control	84.9816
1093711477	O	23							Stimulator Control	84.9132
1093711712	H	13							Stimulator Control	84.898
1093711385	H	5							Stimulator Control	84.7943
1093711606	L	18							Stimulator Control	84.6405
1093711606	H	13							Stimulator Control	84.5694
1093713853	H	13							Stimulator Control	84.4818
1093711545	B	23							Stimulator Control	84.3591
1093713914	I	6	SN0031940321	AZ10429879	HTR2B	3357	6.96	5	Compound	84.2146
1093711477	E	18							Stimulator Control	84.149
1093711491	F	19	SN1075609626	AZ12807733	AXL	558	9.02	5	Compound	84.1336
1093713907	O	23							Stimulator Control	84.0913
1093713914	E	8							Stimulator Control	84.066
1093711545	H	8	SN1071249986	AZ12609865	NTRK1	4914	9.67	5	Compound	84.0641
1093713778	B	23							Stimulator Control	84.0186
1093713907	D	5	SN1089536510	AZ12632012	PTGS2	5743	8.8	5	Compound	84.0159
1093713884	H	13							Stimulator Control	83.9411
1093711651	H	13							Stimulator Control	83.8544
1093711521	E	8							Stimulator Control	83.7508
1093711552	H	21							Stimulator Control	83.4035
1093713778	L	18							Stimulator Control	83.3695
1093713778	H	21							Stimulator Control	83.2945
1093711545	H	21							Stimulator Control	83.2766
1093711606	C	13							Stimulator Control	83.1698
1093711484	H	21							Stimulator Control	83.1059
1093713884	N	13							Stimulator Control	82.7734
1093711699	H	21							Stimulator Control	82.722
1093711743	E	18							Stimulator Control	82.6713
1093711576	L	8							Stimulator Control	82.3618
1093713815	E	18							Stimulator Control	82.2226
1093711514	I	19	SN1077907971	AZ12893858	CYP2D6	1565	7	5	Compound	81.7067
1093711576	M	12	SN1062996041	AZ14119711	JAK3	3718	9.3	5	Compound	81.4867
1093713914	C	13							Stimulator Control	81.3438
1093711453	C	13							Stimulator Control	81.3198
1093711606	H	21							Stimulator Control	81.2215
1093711477	C	13							Stimulator Control	81.0811
1093711439	E	18							Stimulator Control	80.6939
1093711699	D	8	SN1031657377	AZ13344324	SYK	6850	8.67	5	Compound	80.6774
1093711644	E	8							Stimulator Control	80.6411
1093711705	O	23							Stimulator Control	80.5985
1093711637	H	13							Stimulator Control	80.5404
1093711385	H	13							Stimulator Control	80.4283
1093713884	E	18							Stimulator Control	80.3996
1093711491	K	5	SN1062297445	AZ12585887	RET	5979	8.88	5	Compound	80.3345
1093711453	H	21							Stimulator Control	80.3023
1093713907	N	13							Stimulator Control	79.6424
1093711644	M	4	SN0010875587	AZ10010834	CCR5	1234	7.92	5	Compound	79.507
1093711620	H	21							Stimulator Control	79.499
1093711569	E	8							Stimulator Control	79.2856
1093711712	E	18							Stimulator Control	79.1801
1093711408	C	13							Stimulator Control	79.098
1093711620	E	8							Stimulator Control	78.7468
1093711576	I	10	SN1071249840	AZ12757574	NTRK1	4914	9.3	5	Compound	78.5589
1093713914	H	21							Stimulator Control	78.5345
1093711491	H	13							Stimulator Control	78.4174
1093711514	O	7	SN1051013712	AZ12379295	CCNE1	898	9.14	5	Compound	78.0054
1093711453	E	8							Stimulator Control	77.8574
1093711408	M	5	SN0024162635	AZ10242722	IFNB1	3456	7.25	5	Compound	77.8498
1093713839	O	23							Stimulator Control	77.7486
1093713808	L	18							Stimulator Control	77.2626
1093713778	C	16	SN0153029999	AZ10582311	TLR4	7099	5.01	5	Compound	77.2474
1093711385	E	18							Stimulator Control	77.1829
1093711538	K	3	SN1048578444	AZ12336097	CCNE1	898	9.35	5	Compound	76.5246
1093711477	N	13							Stimulator Control	76.5012
1093711682	D	11	SN1066059773	AZ12651953	NTRK1	4914	10	5	Compound	76.4905
1093711521	O	13	SN1034755491	AZ13134015	PSMB5	5693	9.3	5	Compound	76.3724
1093711422	O	11	SN1123536352	AZ13783923	NPC1	4864	5.7	5	Compound	75.8296
1093713891	H	13							Stimulator Control	75.7812
1093711705	H	13							Stimulator Control	74.9901
1093713891	E	8							Stimulator Control	74.977
1093713877	E	6	SN1080096182	AZ12933457	PIK3CA	5290	8.46	5	Compound	74.7947
1093713907	E	18							Stimulator Control	74.5581
1093713891	O	6	SN0185717327	AZ10416130	CDKL5	6792	8.77	5	Compound	74.4675
1093713884	J	15	SN1059862183	AZ13936368	GSK3A	2931	10	5	Compound	74.2941
1093713822	L	18							Stimulator Control	74.0871
1093711538	E	20	SN1150832963	AZ14110887	XPO1	7514	6	5	Compound	73.7854
1093711569	N	11	SN0188025193	AZ11568140	CCNE1	898	7.62	5	Compound	73.7779
1093713808	H	21							Stimulator Control	73.7621
1093711736	E	18							Stimulator Control	72.9635
1093711729	I	14	SN1058514991	AZ13861328	GSK3B	2932	9.54	5	Compound	72.819
1093713860	O	18	SN1004133774	AZ10556898	IL1B	3553	7.4	5	Compound	72.661
1093711675	E	8							Stimulator Control	72.1299
1093711712	D	9	SN0044558158	AZ10358917	NFE2L2	4780	6.94	5	Compound	71.9381
1093711422	C	18	SN1055632718	AZ12464316	CLK2	1196	7.15	5	Compound	71.8766
1093713884	F	13	SN1055973826	AZ13824667	GSK3B	2932	8.71	5	Compound	71.7047
1093711644	D	22	SN1140249037	AZ14106114	RET	5979	9	5	Compound	71.6458
1093711408	F	23	SN1046219104	AZ12264261	JAK3	3718	9.34	5	Compound	71.3617
1093711705	E	18							Stimulator Control	71.1962
1093713891	C	10	SN1110326940	AZ13719272	CCNT1	904	8.22	5	Compound	69.9946
1093713860	K	22	SN1062773446	AZ12572522	CDK2	1017	8.77	5	Compound	69.5528
1093711521	C	13							Stimulator Control	69.2863
1093711408	B	10	SN1123197491	AZ13773220	NLRP3	114548	6.63	5	Compound	69.157
1093713884	B	5	SN0154359961	AZ10554701	HIPK1	204851	9.44	5	Compound	68.6997
1093711491	B	20	SN0188379251	AZ10200049	CCNB1	891	8.69	5	Compound	68.535
1093711422	I	15	SN0029948641	AZ10117935	LMNA	4000	6.95	5	Compound	67.4549
1093713778	B	21	SN0046318497	AZ10172110	NLRP3	114548	5.99	5	Compound	67.437
1093713907	M	8	SN1151681677	AZ14132488	HDAC1	3065	9	5	Compound	67.2572
1093711644	J	13	SN1062915191	AZ12595980	NTRK1	4914	9.4	5	Compound	67.1952
1093711514	N	9	SN1057352458	AZ12496620	PSEN1	5663	5.6	5	Compound	66.5597
1093713822	E	23	11922	N/A	N/A	N/A	N/A	5	Compound	66.3664
1093711705	E	8							Stimulator Control	65.8095
1093711545	N	14	SN0031212809	AZ12163351	FZD8	8325	7.3	5	Compound	65.0875
1093713884	O	12	SN0014898626	AZ10045227	GABRA1	2554	6.68	5	Compound	64.934
1093713877	M	5	SN1140235935	AZ14105977	GMNN	51053	5.47	5	Compound	64.2643
1093711415	C	18	SN1030055446	AZ11550108	MAPK10	5602	6.85	5	Compound	63.588
1093713822	O	4	SN0125106744	AZ10243102	NOS1	4842	9.55	5	Compound	63.1317
1093711699	H	15	SN1057361452	AZ13838456	CDK12	51755	7.01	5	Compound	62.6845
1093711705	M	19	SN1051684424	AZ13781444	GSK3B	2932	8.99	5	Compound	61.6294
1093711613	K	20	SN1070786719	AZ12748102	SRC	6714	8.96	5	Compound	61.2029
1093711644	C	11	SN1053898371	AZ12432102	CLK2	1196	9.29	5	Compound	61.0499
1093713822	O	8	SN1123576281	AZ13785299	CDK2	1017	7.55	5	Compound	60.7792
1093713884	C	11	SN1109368592	AZ13711674	CCNT1	904	8.6	5	Compound	60.5586
1093713914	G	3	SN1127265894	AZ13846925	CDK7	1022	8.42	5	Compound	59.5033
1093711705	C	2	SN1047900893	AZ13756443	CDK9	1025	8.89	5	Compound	59.2948
1093713877	D	23	SN1063767769	AZ12610919	ABL1	25	5.78	5	Compound	59.2879
1093711514	D	5	SN1051354848	AZ13774681	CDK12	51755	6.9	5	Compound	59.126
1093713839	K	18	SN1037828665	AZ12504248	CYP1A2	1544	7	5	Compound	58.6158
1093711439	M	21	SN1006003539	AZ10930497	PRKCB	5579	7.09	5	Compound	58.3926
1093711491	M	12	SN1086862772	AZ13057592	TBK1	29110	7.11	5	Compound	57.9622
1093711477	I	5	SN0188168207	AZ10399772	CDK2	1017	9	5	Compound	57.1821
1093711545	K	6	SN1051354531	AZ12253801	AURKA	6790	9.13	5	Compound	56.763
1093711699	H	6	SN1053841386	AZ12411065	GSK3B	2932	8.57	5	Compound	56.5979
1093711750	L	10	SN1059632852	AZ13927174	GSK3B	2932	10	5	Compound	56.3982
1093711552	D	8	SN1062487871	AZ12588307	CCNE1	898	8.26	5	Compound	56.281
1093711736	H	8	SN1123530275	AZ13783628	DNAH8	1769	6.82	5	Compound	55.7883
1093711682	E	22	SN1073730590	AZ12807581	EPHB4	2050	8.59	5	Compound	55.0593
1093711682	F	15	SN0153941539	AZ10545890	GDA	9615	5.96	5	Compound	54.8119
1093711385	G	18	SN1057353095	AZ12496669	TDP1	55775	10	5	Compound	54.6208
1093711576	C	9	SN1013345304	AZ11125804	GSK3B	2932	8.05	5	Compound	54.0421
1093711712	F	23	SN1030108463	AZ11550731	GSK3B	2932	7.31	5	Compound	53.6359
1093711552	B	18	SN1075705483	AZ12850306	MAP3K7	6885	8.2	5	Compound	53.4807
1093711729	C	6	SN1064810981	AZ12631672	CDK2	1017	8.32	5	Compound	53.4773
1093711439	F	17	SN1055754016	AZ13867064	GSK3B	2932	9.96	5	Compound	53.3045
1093711651	N	2	SN0016231763	AZ10114733	OPRK1	4986	6.96	5	Compound	53.2428
1093711484	K	6	SN1057638931	AZ13841365	GSK3A	2931	9.72	5	Compound	52.8452
1093713891	O	19	SN1063390956	AZ12604484	CCNE1	898	7.82	5	Compound	52.4901
1093711422	N	23	SN1109508827	AZ13715532	CCNT1	904	8.16	5	Compound	51.7846
1093713808	J	2	SN1052454823	AZ13820386	GSK3B	2932	7.05	5	Compound	51.1363
1093713891	I	16	SN1074976353	AZ12834824	JAK2	3717	9.14	5	Compound	51.1037
1093711576	F	17	SN1086867287	AZ13057675	AXL	558	9.55	5	Compound	50.7917
1093713839	M	19	SN1061247596	AZ14105696	XPO1	7514	6	5	Compound	50.7738
1093711385	F	2	SN0022071220	AZ11697675	CDK1	983	7.89	5	Compound	50.4501
1093713846	J	11	SN1048132116	AZ13735617	CSNK1D	1453	8.4	5	Compound	50.3035
1093713914	L	9	SN1140242427	AZ14106051	PSMB5	5693	8	5	Compound	50.0998
1093711620	H	7	SN1109632629	AZ13718602	GSK3B	2932	8.02	5	Compound	49.7223
1093713778	I	19	SN0150301362	AZ10005941	HTR2A	3356	6.85	5	Compound	49.6152
1093711422	C	3	SN1123528166	AZ10292400	ESR2	2100	9.48	5	Compound	49.5809
1093711668	J	3	SN1045820471	AZ13719533	NFKB1	4790	8.8	5	Compound	49.4184
1093711651	K	19	SN1024729428	AZ10218034	ADRA2C	152	7.43	5	Compound	49.1189
1093713884	M	10	SN1074217334	AZ12818497	RET	5979	8.68	5	Compound	48.9146
1093713914	O	19	SN1054380477	AZ10352596	HMGCR	3156	8.89	5	Compound	48.7213
1093711613	G	2	SN1057293454	AZ12494595	GSK3B	2932	8.74	5	Compound	48.6073
1093713853	C	3	SN0212347346	AZ12017591	ADORA1	134	6.47	5	Compound	48.4423
1093711644	D	18	SN1140237643	AZ14105993	ITGA5	3678	9.89	5	Compound	48.3474
1093711491	O	11	SN1060629401	AZ12557021	CCNE1	898	7.42	5	Compound	48.0658
1093713884	D	9	SN1046633507	AZ13731014	CDK9	1025	9.11	5	Compound	48.035
1093711682	J	5	SN1099046264	AZ10849009	HMGCR	3156	9.45	5	Compound	48.005
1093711606	H	19	SN1061381036	AZ12570203	CCNE1	898	7.77	5	Compound	47.9807
1093711613	F	11	SN0020757512	AZ11965101	ATXN2	6311	8.6	5	Compound	47.7532
1093711484	I	8	SN0210384102	AZ11969129	CCNE1	898	9.7	5	Compound	47.4815
1093711446	F	15	SN0213315970	AZ12077490	CDC7	8317	8.4	5	Compound	47.2088
1093711590	B	4	SN1015239373	AZ13027263	AURKB	9212	7.73	5	Compound	47.067
1093711484	E	12	SN1077557362	AZ12672857	SRC	6714	10	5	Compound	47.0259
1093713860	D	16	SN1051480580	AZ13806063	CDK9	1025	7.96	5	Compound	47.0201
1093711675	G	13	SN1057031606	AZ12444557	CCNE1	898	9.18	5	Compound	46.7764
1093713815	E	2	SN1140238681	AZ14105926	KIF11	3832	8.22	5	Compound	46.5022
1093711699	D	19	SN1053219913	AZ12420121	GSK3B	2932	8.82	5	Compound	46.3133
1093713853	F	21	SN1074477757	AZ12718037	SRC	6714	8.3	5	Compound	46.2916
1093711521	E	2	SN1071862212	AZ12708438	NTRK1	4914	9.3	5	Compound	46.2097
1093711446	B	7	SN0027171634	AZ10235797	NUDT1	4521	5.55	5	Compound	46.1845
1093713907	L	21	SN1056971276	AZ12488792	CCNE1	898	8.4	5	Compound	45.822
1093711460	K	10	SN1016921727	AZ13225119	PGR	5241	10	5	Compound	45.7621
1093711644	B	12	SN1151682050	AZ14132495	AURKA	6790	7.38	5	Compound	45.6791
1093711477	E	16	SN1070696486	AZ12746591	NTRK1	4914	9.52	5	Compound	45.4085
1093711613	D	18	SN1048276267	AZ13737674	CSNK1D	1453	7.36	5	Compound	45.2802
1093711415	M	3	SN1044800788	AZ10353479	CHEK1	1111	8.22	5	Compound	45.16
1093711668	K	4	SN0199179571	AZ11944844	ATP1A1	476	8.1	5	Compound	45.1452
1093711484	N	19	SN1033366939	AZ11695243	GSK3B	2932	7.86	5	Compound	45.1216
1093711637	L	3	SN1066041816	AZ12502704	CCNE1	898	9.19	5	Compound	44.6714
1093711699	B	4	SN1140242309	AZ14105996	DNAH8	1769	6.77	5	Compound	44.4459
1093711682	D	3	SN1110327072	AZ13719297	CDK9	1025	6.6	5	Compound	44.3328
1093711484	L	23	SN1140236440	AZ14105890	ABL1	25	9.7	5	Compound	44.1309
1093711736	K	3	SN1057798306	AZ12503983	GSK3B	2932	8.18	5	Compound	44.0781
1093713914	H	10	SN1094658344	AZ13284880	KRAS	3845	5.24	5	Compound	44.0494
1093713853	D	5	SN1062972369	AZ12597013	CCNE1	898	8.92	5	Compound	43.8321
1093713853	D	18	SN1132299241	AZ13959097	CCND1	595	9	5	Compound	43.7682
1093711477	E	5	SN1045969274	AZ13719622	CCNT1	904	9	5	Compound	43.7604
1093711514	E	9	SN0028003533	AZ10229727	TARDBP	23435	6.2	5	Compound	43.4292
1093711620	N	4	SN1065407590	AZ12206155	PARP1	142	6.85	5	Compound	43.3206
1093711477	C	7	SN1059875955	AZ13948141	GSK3A	2931	9.74	5	Compound	43.3032
1093713839	B	14	SN1063079743	AZ12598922	SRC	6714	9.64	5	Compound	43.1716
1093711644	C	22	SN1058312652	AZ13830072	CDK13	8621	8.3	5	Compound	43.1621
1093711460	M	9	SN1032013794	AZ12671100	ADARB1	104	7.74	5	Compound	43.009
1093711750	H	18	SN1151683253	AZ14132521	JAK2	3717	9.23	5	Compound	42.9673
1093711637	M	19	SN1076287848	AZ12609721	LCK	3932	10	5	Compound	42.6714
1093713914	N	19	SN1057638827	AZ13841432	GSK3B	2932	9.83	5	Compound	42.5573
1093711606	G	23	SN1064525585	AZ12625435	PDE4A	5141	9.75	5	Compound	42.3466
1093711477	H	3	SN1040961578	AZ12242846	NR3C2	4306	9.77	5	Compound	42.2866
1093711675	J	13	SN1090140663	AZ13150102	PARP1	142	5.52	5	Compound	42.1612
1093711743	J	3	SN1122300289	AZ13744991	GSK3A	2931	9.24	5	Compound	42.089
1093713822	B	4	SN0054406580	AZ10142113	GRIN1	2902	6.89	5	Compound	41.9863
1093711736	B	6	SN1066599784	AZ12384652	ABL1	25	10	5	Compound	41.9733
1093711590	L	6	SN1042080746	AZ12183824	LIG1	3978	8.01	5	Compound	41.9055
1093711576	O	9	SN0024072822	AZ10115990	PDE3A	5139	5.06	5	Compound	41.8248
1093713884	G	8	SN0151880263	AZ10544727	MPO	4353	4.73	5	Compound	41.8003
1093711507	H	6	SN1048155087	AZ12191950	CYP3A4	1576	6.13	5	Compound	41.7067
1093713877	K	10	SN0016444713	AZ10110866	P2RY2	5029	7.63	5	Compound	41.6248
1093711743	O	6	SN1087491827	AZ13072816	MTOR	2475	8.14	5	Compound	41.5295
1093711705	J	14	SN1059744051	AZ12541869	CCNE1	898	8.17	5	Compound	41.3778
1093711705	G	17	SN1056548614	AZ10387025	HMGCR	3156	8.17	5	Compound	41.2535
1093713839	N	16	SN1090604501	AZ13164099	PRKCI	5584	3.31	5	Compound	41.2122
1093711545	K	4	SN1151663437	AZ14132093	KIF11	3832	8.15	5	Compound	41.1206
1093711538	D	4	SN1063221398	AZ12601495	CDK2	1017	7.85	5	Compound	41.0238
1093711606	M	12	SN1037788046	AZ12128775	NR3C2	4306	9.52	5	Compound	40.9925
1093711606	K	12	SN1054559963	AZ13807586	CSF1R	1436	8	5	Compound	40.5376
1093711712	C	11	SN1122677980	AZ11341640	GSG2	83903	8.05	5	Compound	40.5328
1093711460	M	17	SN0154370449	AZ10292967	ESR2	2100	9.48	5	Compound	40.5179
1093711651	I	20	SN1094624638	AZ13283479	GPR81	27198	5.15	5	Compound	40.32
1093711507	O	7	SN0036444631	AZ12122821	NR3C2	4306	9.77	5	Compound	40.2206
1093711507	G	13	SN1071478279	AZ12409076	GSK3B	2932	7.84	5	Compound	40.0378
1093711668	H	23	SN1060124720	AZ14027223	CDK13	8621	8.16	5	Compound	39.9994
1093711613	O	19	SN0067606367	AZ10319505	MALT1	10892	5.64	5	Compound	39.9241
1093711712	B	16	SN1108701882	AZ13697640	KDR	3791	8.67	5	Compound	39.7972
1093711620	E	2	SN1045820098	AZ13719223	CCNT1	904	8.4	5	Compound	39.7647
1093711538	B	15	SN1065787583	AZ12646625	CCNE1	898	7.81	5	Compound	39.7492
1093711729	B	12	SN1021295572	AZ10206039	DNAH8	1769	5.61	5	Compound	39.7133
1093713907	L	5	SN1056734396	AZ12484281	CCNE1	898	8.1	5	Compound	39.6583
1093711606	F	18	SN0206299846	AZ11705713	CCNE1	898	9	5	Compound	39.635
1093711569	B	10	SN0036955706	AZ10065157	TGM2	7052	5.47	5	Compound	39.275
1093713839	B	18	SN0203289526	AZ11597970	CCNB1	891	9.73	5	Compound	39.0871
1093711484	J	19	SN1014015879	AZ13099966	CCNE1	898	7.22	5	Compound	39.0154
1093711545	M	13	SN1123533842	AZ13783689	PRKCA	5578	7.59	5	Compound	38.9517
1093711699	N	20	SN1052454837	AZ13820385	GSK3B	2932	7.05	5	Compound	38.9047
1093711651	K	15	SN1061311185	AZ12504625	CCNA2	890	10	5	Compound	38.8769
1093711514	C	10	SN1060324024	AZ12443672	SRC	6714	8.7	5	Compound	38.8601
1093713853	D	13	SN1062901749	AZ12425979	AKT1	207	9.8	5	Compound	38.8102
1093711453	K	21	SN0127491906	AZ10044858	IKBKB	3551	6.23	5	Compound	38.6542
1093711606	I	8	SN1045820353	AZ13719463	CDK12	51755	6.12	5	Compound	38.356
1093711415	N	2	SN0153942577	AZ10320548	APEX1	328	7.95	5	Compound	38.3518
1093711538	C	4	SN1051491960	AZ13774828	PPARG	5468	9.82	5	Compound	38.3234
1093711705	C	21	SN1076787902	AZ12870676	PLA2G10	8399	7.61	5	Compound	38.2733
1093711743	D	15	SN1047164129	AZ13723372	IRAK4	51135	8.39	5	Compound	38.2529
1093711736	J	16	SN1044754064	AZ12237560	TEK	7010	8.71	5	Compound	38.2364
1093711576	B	19	SN1060398343	AZ12552658	DHODH	1723	6.94	5	Compound	38.1223
1093711712	L	19	SN1070008356	AZ12732697	CDK16	5127	9.46	5	Compound	38.0681
1093711484	B	18	SN1089190520	AZ12632319	ADM	133	6.6	5	Compound	37.8433
1093711668	I	23	SN1060629797	AZ12557025	CCNE1	898	7.7	5	Compound	37.8079
1093711651	L	11	SN1031011949	AZ11568876	MMP2	4313	7.47	5	Compound	37.8047
1093713846	L	13	SN1105853052	AZ10136394	SHBG	6462	8.91	5	Compound	37.7952
1093711699	K	3	SN0028495382	AZ10547521	MAP2K6	5608	6.8	5	Compound	37.7789
1093711453	C	16	SN1048281424	AZ13232525	CDC7	8317	8.7	5	Compound	37.7313
1093711682	C	9	SN1060998317	AZ14103770	GSK3A	2931	9.27	5	Compound	37.4101
1093711507	M	3	SN1051013858	AZ12379297	CCNE1	898	9.12	5	Compound	37.3401
1093711453	E	21	SN1044109326	AZ12260002	KIF11	3832	6.37	5	Compound	37.0706
1093711484	K	17	SN1039173479	AZ11683469	CYP2C19	1557	7.74	5	Compound	36.9232
1093711514	M	21	SN1039203637	AZ13728306	CCNT1	904	9.42	5	Compound	36.879
1093711422	J	14	SN1005657148	AZ10974064	PRKCI	5584	7.59	5	Compound	36.5976
1093711422	M	9	SN0067076250	AZ10286083	GLB1	2720	6.2	5	Compound	36.5948
1093711637	I	12	SN1063659702	AZ12608964	AR	367	9.52	5	Compound	36.3873
1093711712	H	22	SN1045614781	AZ12170098	JAK2	3717	8.85	5	Compound	36.3837
1093713884	I	23	SN0013780128	AZ11970219	PGR	5241	10	5	Compound	36.3466
1093711620	K	19	SN1109644646	AZ13718956	GSK3A	2931	7.49	5	Compound	36.1758
1093711637	O	20	SN1048163792	AZ12278487	CCNE1	898	8.39	5	Compound	36.1721
1093711682	M	22	SN1048744455	AZ13733920	PDE6D	5147	8.96	5	Compound	36.1575
1093713907	H	8	SN0016231881	AZ10114736	ADORA2A	135	6.77	5	Compound	36.1223
1093711637	G	4	SN1069784965	AZ12728684	ITGA5	3678	8.17	5	Compound	36.0604
1093711545	C	7	SN0202861890	AZ11628429	CCNE1	898	6.74	5	Compound	35.9985
1093711613	M	2	SN0069360247	AZ10349633	SHH	6469	7.52	5	Compound	35.9746
1093711521	M	12	SN1107710470	AZ13674217	PADI4	23569	4.81	5	Compound	35.8689
1093711699	F	6	SN1022318062	AZ10705652	CREBBP	1387	4.71	5	Compound	35.5367
1093711651	G	16	SN1066525622	AZ12368919	CCNE1	898	8.24	5	Compound	35.4507
1093711644	B	16	SN1047339344	AZ13725741	AHR	196	8.14	5	Compound	35.4317
1093711439	C	6	SN1057733612	AZ11889318	SHBG	6462	8.51	5	Compound	35.369
1093711736	N	2	SN1056224557	AZ12367841	AURKB	9212	9.65	5	Compound	35.3441
1093711675	B	17	SN1041542844	AZ11665362	GPR44	11251	8.6	5	Compound	35.211
1093713877	H	10	SN1081710780	AZ12975455	PSEN1	5663	7.11	5	Compound	34.8596
1093711651	K	9	SN1125566786	AZ12134092	SYK	6850	9.81	5	Compound	34.7669
1093713891	F	11	SN1000498953	AZ12598921	SRC	6714	10	5	Compound	34.5793
1093713839	J	2	SN0032693395	AZ10488549	NR3C2	4306	7.16	5	Compound	34.2096
1093711743	K	23	SN1078998854	AZ12487957	SRC	6714	8.74	5	Compound	34.0621
1093711408	K	7	SN1106713132	AZ13646290	PRKDC	5591	7.86	5	Compound	33.9414
1093711712	J	23	SN1025688531	AZ12131492	NR3C1	2908	5.81	5	Compound	33.8585
1093711613	K	8	SN0178629597	AZ10036187	CDK2	1017	9	5	Compound	33.7975
1093711415	E	21	SN1123537305	AZ13783749	GSK3A	2931	9.22	5	Compound	33.7594
1093713808	J	8	SN1019106211	AZ13225218	ACVRL1	94	7.86	5	Compound	33.5753
1093711408	I	19	SN1058539184	AZ12518215	PIP5K1C	23396	5.99	5	Compound	33.4825
1093711613	D	3	SN1051816269	AZ12396542	CXCR2	3579	6.44	5	Compound	33.4528
1093711644	F	23	SN1060811386	AZ12560255	P2RY2	5029	7.48	5	Compound	33.2105
1093711729	N	22	SN1037110060	AZ11125399	GSK3B	2932	9.66	5	Compound	33.1936
1093713860	M	10	SN1047337347	AZ12311116	CDK2	1017	8.52	5	Compound	33.0996
1093713846	M	16	SN0116818521	AZ11889794	TUBB3	10381	8.24	5	Compound	33.0904
1093713839	J	14	SN1058171788	AZ12511014	CDK9	1025	7.52	5	Compound	33.0316
1093711460	C	18	SN1057822873	AZ12504374	ESR1	2099	7.15	5	Compound	32.9331
1093711613	O	17	SN1107081877	AZ13655219	KCNH2	3757	4.02	5	Compound	32.792
1093711606	I	13	SN1048268586	AZ13737673	GSK3B	2932	8.34	5	Compound	32.6274
1093711545	I	3	SN0067351101	AZ10303525	GIPR	2696	6.25	5	Compound	32.591
1093711620	N	19	SN0214876895	AZ12217880	ESR2	2100	5.58	5	Compound	32.405
1093711415	C	4	SN1105187427	AZ13595069	UBA52	7311	4.71	5	Compound	32.3855
1093711743	I	19	SN1031081102	AZ11575492	KDR	3791	6.88	5	Compound	32.3071
1093711446	O	19	SN1076054535	AZ12773966	MTOR	2475	8.81	5	Compound	32.3002
1093711408	G	13	SN1059386327	AZ12489898	PTK2	5747	9.75	5	Compound	32.2269
1093711446	C	2	SN1060736397	AZ12558952	CDK2	1017	7.55	5	Compound	32.2029
1093713846	G	14	SN1056244289	AZ13850954	GSK3B	2932	8.74	5	Compound	32.1757
1093711538	H	17	SN1123521943	AZ13783543	STS	412	6.68	5	Compound	32.152
1093711699	M	8	SN1106932555	AZ13650788	PIK3CG	5294	7.69	5	Compound	31.7796
1093711705	N	21	SN1122311641	AZ13745142	PIK3CD	5293	7.62	5	Compound	31.7162
1093711521	C	3	SN1009036474	AZ12971271	MTOR	2475	8.75	5	Compound	31.7077
1093711606	N	6	SN1123523797	AZ12631956	AR	367	8.14	5	Compound	31.6317
1093711644	N	8	SN1094657674	AZ13284866	PRKCZ	5590	8.52	5	Compound	31.5812
1093713860	D	2	SN1026103565	AZ11229719	P2RY2	5029	7.38	5	Compound	31.5666
1093711545	O	8	SN0150182995	AZ10522304	TNKS	8658	7.33	5	Compound	31.5003
1093711729	M	11	SN1093820887	AZ13256101	CYP11B2	1585	9.7	5	Compound	31.3252
1093711729	D	21	SN0046345475	AZ11870287	NR3C2	4306	7.85	5	Compound	31.1786
1093711682	H	6	SN0039332621	AZ10291939	FAAH	2166	6.48	5	Compound	31.122
1093711675	D	20	SN1059521883	AZ13926271	CSNK1D	1453	6.74	5	Compound	31.0047
1093711545	G	5	SN1074216650	AZ12818485	ALK	238	8.52	5	Compound	30.9411
1093711705	D	22	SN0215923065	AZ10202485	PSEN1	5663	5.03	5	Compound	30.7826
1093711514	F	10	SN1059806504	AZ11796684	CYP1A2	1544	7.13	5	Compound	30.6281
1093713808	I	8	SN1047483929	AZ13762574	CCNT1	904	7.52	5	Compound	30.6256
1093711743	N	3	SN0215698249	AZ12000003	EPHB4	2050	5.8	5	Compound	30.6184
1093713860	F	10	SN0206732455	AZ11765661	MAPK14	1432	6.74	5	Compound	30.5003
1093713839	J	12	SN1036121508	AZ13508033	CENPE	1062	8.64	5	Compound	30.4676
1093711712	C	14	SN1140243734	AZ14106025	FGFR4	2264	8.22	5	Compound	30.4375
1093711620	M	8	SN1026458176	AZ13374138	FPR1	2357	7.55	5	Compound	30.3544
1093711545	H	14	SN1060338315	AZ12551521	CDK5	1020	9	5	Compound	30.3204
1093711545	B	11	SN1107818037	AZ13677012	BRD3	8019	5.72	5	Compound	30.305
1093711460	J	10	SN1049662973	AZ11548271	GSK3B	2932	9.69	5	Compound	30.2887
1093711538	D	12	SN1094656235	AZ13284837	INSR	3643	8.66	5	Compound	30.2729
1093711736	D	20	SN1151683786	AZ14132531	CCNA2	890	9.4	5	Compound	30.2447
1093711545	D	7	SN1006963458	AZ10745675	PRKCB	5579	7.43	5	Compound	30.2304
1093711682	I	13	SN1003959720	AZ11939564	ESR1	2099	7.74	5	Compound	30.1494
1093713808	I	10	SN1065185152	AZ12637533	GSK3B	2932	7.66	5	Compound	30.0138
1093711422	J	23	SN1016327227	AZ13094441	TNF	7124	8.52	5	Compound	29.8688
1093711521	C	21	SN0066599343	AZ10043617	CCNE1	898	8.4	5	Compound	29.716
1093713860	C	21	SN0150508740	AZ10531854	MTNR1B	4544	6.11	5	Compound	29.5927
1093713907	M	11	SN1032875983	AZ13453140	AURKB	9212	8	5	Compound	29.5525
1093711743	N	2	SN0164419936	AZ10234566	JAK2	3717	5.73	5	Compound	29.2857
1093711521	C	11	SN1122309428	AZ13745332	HMGCR	3156	4.98	5	Compound	29.2703
1093711729	C	9	SN1000740183	AZ13100011	FLT3	2322	9.34	5	Compound	29.2017
1093711699	N	6	SN1004261308	AZ10963702	CXCR2	3579	8.18	5	Compound	29.1268
1093711460	N	3	SN0071998241	AZ10366018	GFER	2671	6.24	5	Compound	29.0731
1093711576	C	16	SN1057514585	AZ12411062	GSK3B	2932	8.54	5	Compound	29.0671
1093711552	I	5	SN0213881279	AZ12091922	MARK2	2011	5.85	5	Compound	28.8406
1093711507	K	10	SN1140248103	AZ14106105	CA12	771	8.47	5	Compound	28.8292
1093711590	O	4	SN1019106107	AZ13224819	ACVRL1	94	7.7	5	Compound	28.8123
1093713860	H	9	SN1014533017	AZ13128376	CTSC	1075	7.2	5	Compound	28.7758
1093711453	N	15	SN0191756108	AZ12001875	CACNA1H	8912	6.41	5	Compound	28.7552
1093711552	L	15	SN1030045373	AZ11125557	GSK3B	2932	8.56	5	Compound	28.7057
1093711682	I	5	SN1151682852	AZ14132511	STAT6	6778	7.68	5	Compound	28.586
1093711750	M	22	SN0152362105	AZ10466450	IKBKB	3551	6.11	5	Compound	28.4476
1093713839	N	15	SN1008952917	AZ13076855	HSD11B1	3290	8.45	5	Compound	28.4015
1093711422	K	4	SN0210120928	AZ11946253	ACVR2B	93	6.63	5	Compound	28.3853
1093711620	B	11	SN1062128280	AZ14121561	MET	4233	6.45	5	Compound	28.3812
1093711408	G	11	SN0150418318	AZ10527402	CTSS	1520	4.3	5	Compound	28.3787
1093711446	E	19	SN1069302590	AZ12189258	AURKB	9212	9.61	5	Compound	28.2543
1093711507	I	15	SN1089219503	AZ12632280	NR3C2	4306	7.16	5	Compound	28.1386
1093711491	F	21	SN1030185042	AZ11551343	GSK3B	2932	7.99	5	Compound	28.1102
1093711569	N	20	SN0037171534	AZ10492175	NAT8	9027	6.41	5	Compound	28.0772
1093711477	E	12	SN1076524431	AZ12865433	MTOR	2475	9.03	5	Compound	27.9886
1093713846	L	2	SN1048122175	AZ13784725	CDK12	51755	7.73	5	Compound	27.88
1093713860	C	3	SN0212714907	AZ12116449	SENP8	123228	5.12	5	Compound	27.7912
1093713891	J	11	SN1123530011	AZ13783624	MAOA	4128	8.42	5	Compound	27.7906
1093711491	I	14	SN1057194942	AZ13836782	CECR2	27443	7.33	5	Compound	27.7722
1093711699	D	5	SN1109508544	AZ13715526	CCNT1	904	8.3	5	Compound	27.6943
1093711705	N	10	SN0011940785	AZ10011942	SLC22A8	9376	6.24	5	Compound	27.6231
1093711705	H	6	SN1063722924	AZ12610206	GSK3B	2932	7.51	5	Compound	27.613
1093713914	C	5	SN1056734415	AZ12484283	CCNE1	898	8.15	5	Compound	27.6044
1093711637	J	11	SN1053692852	AZ10027237	CACNA1C	775	9.68	5	Compound	27.5451
1093711514	M	18	SN1020344958	AZ13317076	TRPA1	8989	7.98	5	Compound	27.4952
1093711682	C	11	SN0045309114	AZ10164573	MLYCD	23417	8.07	5	Compound	27.3697
1093713846	F	2	SN1001532285	AZ12917596	GSK3B	2932	7.82	5	Compound	27.0571
1093713839	O	8	SN1086654106	AZ13052979	TBK1	29110	7.43	5	Compound	27.0119
1093711651	F	5	SN1054772913	AZ13822222	GSK3B	2932	8.55	5	Compound	26.684
1093713877	N	11	SN1065411204	AZ12501465	PARP1	142	7.32	5	Compound	26.6642
1093711750	D	14	SN0179154147	AZ10361526	TTK	7272	6.22	5	Compound	26.6367
1093711491	M	10	SN1083163666	AZ11135411	RPS6KA2	6196	10	5	Compound	26.5915
1093711576	M	3	SN1029596095	AZ10012304	HRH1	3269	8.27	5	Compound	26.5333
1093711637	G	10	SN1105855458	AZ10849009	SQLE	6713	7.55	5	Compound	26.5105
1093711439	J	20	SN0036815740	AZ10144766	GRIN1	2902	6.34	5	Compound	26.4225
1093711606	B	7	SN0201175648	AZ11611107	AURKA	6790	10	5	Compound	26.3684
1093711682	F	2	SN1061839967	AZ12561099	JAK2	3717	8.52	5	Compound	26.3421
1093713860	D	21	SN1053889837	AZ13795665	IRAK4	51135	7.48	5	Compound	26.2428
1093713914	D	4	SN0037204999	AZ10493256	SPHK1	8877	3.22	5	Compound	26.1442
1093713815	J	12	SN1062274284	AZ12585503	CTSK	1513	8.49	5	Compound	26.1266
1093711477	H	8	SN1122301601	AZ13632779	BIRC5	332	9.27	5	Compound	26.0452
1093713860	I	5	SN1057816933	AZ12504181	PDGFRA	5156	7.85	5	Compound	26.042
1093713839	F	8	SN1105187026	AZ13595063	N/A	N/A	N/A	5	Compound	25.9617
1093711705	D	5	SN1060629934	AZ12557029	CDK2	1017	6.68	5	Compound	25.9545
1093711736	G	22	SN1044098050	AZ12232357	CCNE1	898	9.52	5	Compound	25.89
1093711507	N	6	SN1039908520	AZ11130597	HTR1A	3350	9.2	5	Compound	25.7733
1093711484	H	10	SN1073511228	AZ12803069	GSK3A	2931	9.7	5	Compound	25.7653
1093711644	K	4	SN0055124481	AZ10046111	LCK	3932	9.82	5	Compound	25.7592
1093711484	E	20	SN1050471980	AZ13769046	JAK3	3718	9.3	5	Compound	25.7361
1093711477	L	3	SN0027837023	AZ10421813	HTR2B	3357	7.49	5	Compound	25.7026
1093713846	G	2	SN1123529907	AZ13783623	MAOB	4129	6.78	5	Compound	25.6446
1093713839	C	19	SN1014109481	AZ13208104	GSK3B	2932	7.96	5	Compound	25.6109
1093711620	O	15	SN1045672181	AZ10363549	CCNB1	891	8.39	5	Compound	25.6027
1093711613	H	22	SN0015434910	AZ10049278	CBX1	10951	8.22	5	Compound	25.5741
1093711484	C	16	SN1039713731	AZ13552921	MKNK2	2872	7.78	5	Compound	25.5604
1093711538	J	23	SN0039455904	AZ10418479	ESR2	2100	8.85	5	Compound	25.5262
1093711712	H	9	SN0029804249	AZ10009845	GRIN1	2902	5.74	5	Compound	25.5098
1093711545	C	18	SN0183150963	AZ10048881	CDK2	1017	8.52	5	Compound	25.4657
1093713853	E	9	SN1016707338	AZ13157917	GSK3B	2932	8.64	5	Compound	25.42
1093711682	O	9	SN0032689281	AZ10412785	MAPK14	1432	7.22	5	Compound	25.3703
1093711460	H	11	SN1071856253	AZ12748105	SRC	6714	8.72	5	Compound	25.3131
1093711675	D	3	SN1057817867	AZ12504195	OPRK1	4986	9.82	5	Compound	25.237
1093711545	M	7	SN0180186130	AZ10380918	CDK2	1017	7.76	5	Compound	25.228
1093711552	G	18	SN0212626533	AZ10030606	LCK	3932	9.1	5	Compound	25.2016
1093713846	G	18	SN1063534560	AZ12497009	GSK3B	2932	7.44	5	Compound	25.1132
1093711620	B	5	SN1089190416	AZ12632002	ESR1	2099	9.93	5	Compound	25.11
1093711460	B	12	SN0199176037	AZ12135111	GMNN	51053	6.79	5	Compound	25.0905
1093713884	G	23	SN1021624026	AZ13237244	IGF1R	3480	8	5	Compound	25.0461
1093713778	H	19	SN1059959828	AZ14114446	MAP4K5	11183	7.02	5	Compound	24.9924
1093711729	L	20	SN1140238846	AZ14105930	CDK2	1017	7.02	5	Compound	24.923
1093711699	G	16	SN1122317600	AZ13745214	ITGAV	3685	9.27	5	Compound	24.8775
1093711620	I	14	SN1099352292	AZ13282107	GSK3B	2932	8.66	5	Compound	24.8642
1093713884	O	16	SN1035568777	AZ13250285	CSNK2A2	1459	9	5	Compound	24.7568
1093711668	B	10	SN1034339150	AZ13440232	DTYMK	1841	9	5	Compound	24.6858
1093711507	N	9	SN1151668188	AZ14132167	FLT3	2322	8.91	5	Compound	24.6628
1093713853	M	21	SN1075954800	AZ12855782	MAPK1	5594	8.31	5	Compound	24.5148
1093711644	N	22	3365	N/A	N/A	N/A	N/A	5	Compound	24.5109
1093711408	J	13	SN1123576696	AZ13785312	KCNH2	3757	3.79	5	Compound	24.4853
1093711491	H	6	SN1056398970	AZ12477161	LIG1	3978	3.4	5	Compound	24.3617
1093713877	N	6	SN1079030347	AZ12894662	GSK3B	2932	9.12	5	Compound	24.3387
1093711736	B	14	SN1109190065	AZ13706499	PAK1	5058	8.22	5	Compound	24.3318
1093711682	N	9	SN1140241625	AZ14106044	JAK3	3718	9.8	5	Compound	24.3248
1093711439	O	11	SN0124571503	AZ10198210	GLP1R	2740	5.85	5	Compound	24.3136
1093711514	J	4	SN0203581801	AZ11624846	CDK2	1017	7.75	5	Compound	24.2861
1093711484	B	4	SN1140252321	AZ14106186	DYRK1A	1859	8.4	5	Compound	24.2549
1093711668	C	2	SN1081823070	AZ12977862	MTOR	2475	7.3	5	Compound	24.2518
1093711408	D	3	SN1071894106	AZ12771092	PLK1	5347	6.02	5	Compound	24.2434
1093713877	B	8	SN1138069800	AZ14102074	PIK3CD	5293	7.64	5	Compound	24.1273
1093711705	D	4	SN1063557197	AZ12607093	CDK2	1017	8.8	5	Compound	24.1197
1093711606	F	5	SN0206640028	AZ12014279	ESR1	2099	10	5	Compound	24.086
1093713860	D	12	SN0010826642	AZ10010023	AGTR1	185	8.41	5	Compound	24.0107
1093711538	J	8	SN0029553050	AZ10010398	MAPK14	1432	7.06	5	Compound	23.9219
1093711606	I	4	SN1123573818	AZ10588344	PRKCB	5579	8.8	5	Compound	23.8362
1093711750	H	2	SN1151683017	AZ14132517	PIK3CA	5290	8.7	5	Compound	23.817
1093711613	N	16	SN1049241691	AZ12349868	GMNN	51053	6.84	5	Compound	23.8137
1093711675	N	17	SN0207986371	AZ11907220	TRPM8	79054	6.64	5	Compound	23.7788
1093713907	N	2	SN1090321596	AZ13155896	ALDH1A1	216	6.95	5	Compound	23.7475
1093711545	K	11	SN1122303842	AZ13745286	CCNE1	898	9.77	5	Compound	23.7353
1093711613	G	17	SN1038606759	AZ13568456	JAK2	3717	9	5	Compound	23.7162
1093711699	J	9	SN0026232479	AZ12169114	CDK5	1020	5.6	5	Compound	23.7156
1093713808	J	6	SN0188383497	AZ10046146	PDGFRB	5159	7.4	5	Compound	23.6061
1093713914	O	20	SN0124417708	AZ10170969	TTK	7272	6.06	5	Compound	23.5714
1093713846	D	10	SN1048390548	AZ13738244	EGFR	1956	7.88	5	Compound	23.4882
1093713778	B	7	SN0010216426	AZ10002537	PADI4	23569	5.05	5	Compound	23.454
1093711460	N	22	SN0036192941	AZ10292810	GABRA1	2554	7.72	5	Compound	23.4076
1093711408	C	20	SN1026697448	AZ13419384	SGK2	10110	8.52	5	Compound	23.3156
1093713808	O	7	8164	N/A	N/A	N/A	N/A	5	Compound	23.3151
1093713907	M	19	SN1040938672	AZ12123236	NR1H4	9971	8.08	5	Compound	23.3149
1093711637	O	15	SN1032870189	AZ13503014	SREBF1	6720	6.15	5	Compound	23.3072
1093711569	E	21	SN1074830225	AZ12782571	ITGA5	3678	9.4	5	Compound	23.2991
1093711446	L	16	SN1025667512	AZ10590778	TLR7	51284	7.33	5	Compound	23.29
1093711415	O	5	SN0189536404	AZ11596888	JAK2	3717	8.42	5	Compound	23.2687
1093711446	I	15	SN1090320426	AZ13155941	FFAR2	2867	4.92	5	Compound	23.2625
1093711415	B	12	SN1038203072	AZ13563458	ATR	545	8	5	Compound	23.2015
1093711644	K	18	SN1046868060	AZ12302465	CHEK1	1111	9.52	5	Compound	23.186
1093711644	N	15	SN1071872266	AZ12770614	PLK1	5347	6.18	5	Compound	23.1224
1093711545	F	7	SN1087686353	AZ12589643	SRC	6714	8.29	5	Compound	23.0978
1093713877	N	5	SN1140249957	AZ14106146	DPP4	1803	8.64	5	Compound	23.0579
1093711514	M	17	SN1056088691	AZ12472647	CSNK1A1	1452	10	5	Compound	23.0482
1093711569	M	4	SN1086410215	AZ10200900	CHRM1	1128	8	5	Compound	23.0471
1093713891	H	18	SN0115913610	AZ10017623	TUBB3	10381	8.74	5	Compound	23.0366
1093711620	O	19	SN1067265324	AZ12676647	TAS2R14	50840	7.27	5	Compound	23.0138
1093711385	E	20	SN1048006323	AZ13733612	PRKCD	5580	8.7	5	Compound	22.9897
1093711392	I	5	13396	N/A	N/A	N/A	N/A	5	Compound	22.9837
1093711538	H	8	SN1089828558	AZ13141958	RAF1	5894	7.34	5	Compound	22.9814
1093713877	O	18	SN0214325419	AZ10014671	TUBA4A	7277	5.73	5	Compound	22.9793
1093711385	D	18	SN1039173201	AZ13079365	GSK3B	2932	8.56	5	Compound	22.9762
1093711699	O	10	SN1069009159	AZ12711725	MKNK2	2872	6.24	5	Compound	22.9219
1093713839	M	16	SN0176592317	AZ11378564	PGR	5241	8.07	5	Compound	22.8407
1093713853	B	11	SN1041770610	AZ13644905	HTR2B	3357	5.97	5	Compound	22.8355
1093711514	N	6	SN0028384701	AZ11965522	ESR1	2099	9.9	5	Compound	22.8102
1093713860	F	16	SN1053620827	AZ13848659	MERTK	10461	9.01	5	Compound	22.7779
1093713860	H	10	SN1025262650	AZ10825375	CYP2C19	1557	7.2	5	Compound	22.7546
1093711521	E	12	SN1020787225	AZ13259473	HIPK2	28996	10	5	Compound	22.6778
1093713839	J	6	SN1064927135	AZ12633135	CCNE1	898	8.56	5	Compound	22.6108
1093711538	O	15	SN0081716845	AZ10388767	CHEK1	1111	5.89	5	Compound	22.5849
1093711439	I	5	SN0187985382	AZ11705214	JAK2	3717	8.52	5	Compound	22.5217
1093711545	N	2	SN1063722655	AZ12610199	GSK3B	2932	7.6	5	Compound	22.5036
1093711521	F	3	SN1040606605	AZ12061270	NR4A2	4929	5.6	5	Compound	22.4897
1093711736	M	3	SN1056771170	AZ13833068	KMO	8564	7.9	5	Compound	22.4599
1093711453	J	7	SN1059177746	AZ12530268	SMYD2	56950	5.98	5	Compound	22.4269
1093711682	D	23	SN1066790658	AZ12060942	KIF11	3832	9.22	5	Compound	22.4247
1093713907	I	7	SN1107645705	AZ13672159	NR1D1	9572	6.4	5	Compound	22.3797
1093711460	O	8	SN0081784672	AZ10391778	BCHE	590	4.99	5	Compound	22.3324
1093713860	D	4	SN1067284366	AZ12671675	MTOR	2475	7.76	5	Compound	22.2901
1093713853	E	14	SN1066146675	AZ12608879	GSK3B	2932	7.68	5	Compound	22.2813
1093713884	O	17	SN0029162243	AZ10058414	GSK3B	2932	4.66	5	Compound	22.2736
1093711651	B	5	SN1047599214	AZ12276426	CCNE1	898	8.24	5	Compound	22.2722
1093711644	C	7	SN1050480443	AZ12368875	CCNE1	898	8.52	5	Compound	22.2377
1093713853	H	3	SN1068332112	AZ12594264	MTOR	2475	8.6	5	Compound	22.2145
1093711521	I	11	SN0028518024	AZ10828221	LMNA	4000	6.5	5	Compound	22.2114
1093711613	N	23	SN1055029099	AZ13812794	POLG	5428	3.84	5	Compound	22.1915
1093711446	N	10	SN1105122063	AZ13592742	MBD1	4152	6.94	5	Compound	22.1703
1093711453	I	14	SN1027993317	AZ13420965	PRKCA	5578	8.22	5	Compound	22.1649
1093711736	O	17	SN1036220309	AZ13532789	PIK3CA	5290	7.95	5	Compound	22.1334
1093711712	L	23	SN0206920923	AZ11980973	CCR2	729230	6.2	5	Compound	21.9906
1093711538	N	6	SN1035798107	AZ10168670	NR1H3	10062	6.07	5	Compound	21.9857
1093711729	K	6	SN0133004401	AZ10435400	MAPK1	5594	5.95	5	Compound	21.9467
1093711705	O	11	SN1151657983	AZ14131980	NR3C1	2908	5.4	5	Compound	21.943
1093711651	O	14	SN1060629278	AZ12557020	CDK2	1017	7.34	5	Compound	21.9278
1093711606	C	16	SN0128646917	AZ10285602	CDK5	1020	6.36	5	Compound	21.8746
1093711576	E	13	SN1086160502	AZ13043340	CCNB1	891	8.52	5	Compound	21.8016
1093711484	K	2	SN1000435226	AZ13124033	PDPK1	5170	7.93	5	Compound	21.7605
1093711569	M	19	SN1061330350	AZ10710523	CDK9	1025	4.52	5	Compound	21.7218
1093711668	E	3	SN1048013853	AZ13733939	PDE6D	5147	8.96	5	Compound	21.6221
1093711460	K	6	SN0020130193	AZ10004429	ADRA1A	148	5.6	5	Compound	21.5951
1093713914	B	13	SN1077244337	AZ12880586	NDUFS1	4719	6.62	5	Compound	21.5334
1093711750	C	2	SN1151682597	AZ14132505	HIF1A	3091	9	5	Compound	21.4666
1093711736	O	4	SN1076055068	AZ12778563	MTOR	2475	8.89	5	Compound	21.4391
1093711712	O	9	SN1055019794	AZ12435279	CCR8	1237	8.58	5	Compound	21.4259
1093711507	E	16	SN1016827026	AZ13100012	AXL	558	9.58	5	Compound	21.4247
1093711415	N	5	SN1019272701	AZ11151538	KAT2A	2648	4.65	5	Compound	21.4162
1093711415	M	7	SN1065067323	AZ12632293	ABCB1	5243	9.39	5	Compound	21.3819
1093713846	L	12	SN0028326230	AZ10234685	TLR4	7099	5.16	5	Compound	21.353
1093711569	I	7	SN0024875096	AZ10136934	ITK	3702	5.6	5	Compound	21.3463
1093711446	D	19	SN0015464412	AZ10053255	PGR	5241	5.3	5	Compound	21.3387
1093711477	G	9	SN1031568366	AZ13574608	DOT1L	84444	7.86	5	Compound	21.3362
1093711668	O	14	SN1025308297	AZ12128436	SLC6A2	6530	7.92	5	Compound	21.3271
1093711705	C	8	SN1122308074	AZ13745088	N/A	N/A	N/A	5	Compound	21.273
1093713815	D	12	SN0037186759	AZ10492620	GRM5	2915	7.4	5	Compound	21.2511
1093711521	M	18	SN1047332970	AZ13763780	SYK	6850	9.82	5	Compound	21.169
1093711750	K	22	SN1048482035	AZ12334389	EGFR	1956	6.77	5	Compound	21.0634
1093713877	L	2	SN0150473576	AZ12064453	ACE	1636	8.59	5	Compound	21.056
1093711675	D	22	SN0206828595	AZ10234562	JAK2	3717	7.58	5	Compound	20.9655
1093713914	C	7	SN0015496169	AZ10053712	N/A	N/A	N/A	5	Compound	20.924
1093711651	O	5	SN0039379726	AZ10297661	ESR1	2099	9.74	5	Compound	20.8793
1093711408	K	10	SN1102797009	AZ10032534	AURKB	9212	6.84	5	Compound	20.8419
1093711750	H	7	SN1140243602	AZ13374268	GRIN3A	116443	9.51	5	Compound	20.8413
1093711439	J	5	SN1045668232	AZ12262607	GRM5	2915	8.71	5	Compound	20.8138
1093713778	H	15	SN1125566937	AZ13809657	MAP3K12	7786	9.36	5	Compound	20.7291
1093711477	G	5	SN1008597353	AZ11776537	ABL1	25	9.92	5	Compound	20.7189
1093711644	L	13	SN1070783511	AZ12748058	MPO	4353	5.15	5	Compound	20.7161
1093711408	O	18	SN1074061402	AZ12815054	PTK2B	2185	7	5	Compound	20.7045
1093711552	L	12	SN1025928855	AZ10958279	GSK3A	2931	7	5	Compound	20.6974
1093713891	C	6	SN1042429364	AZ11921860	MAPK10	5602	8.1	5	Compound	20.6598
1093713907	D	3	SN1057353128	AZ12495581	CYP1A2	1544	6.3	5	Compound	20.6322
1093713860	O	5	SN0213262566	AZ12076521	HPN	3249	6.01	5	Compound	20.6259
1093711613	L	4	SN1045963452	AZ13754725	MAPK1	5594	8.55	5	Compound	20.5909
1093713907	L	11	SN1100374678	AZ13459195	PIK3CA	5290	9.24	5	Compound	20.5753
1093711699	M	13	SN1123523415	AZ13783562	KCNH2	3757	5.56	5	Compound	20.5033
1093713907	K	23	SN1071180673	AZ12710365	SRC	6714	9.22	5	Compound	20.4925
1093711491	D	9	SN1068675988	AZ10532221	SLC29A1	2030	8.96	5	Compound	20.4795
1093713846	D	22	SN0027578723	AZ11714266	CYP3A4	1576	6.23	5	Compound	20.4639
1093713778	D	5	SN1057809148	AZ10615377	ZAP70	7535	6.44	5	Compound	20.4637
1093711484	M	9	SN1108690266	AZ13697076	EPHA6	285220	8.24	5	Compound	20.4122
1093711477	G	16	SN1029922275	AZ13163317	GRM5	2915	7.86	5	Compound	20.398
1093711392	B	7	13258	N/A	N/A	N/A	N/A	5	Compound	20.3939
1093713907	C	21	SN0208615558	AZ11913400	AR	367	6.74	5	Compound	20.3768
1093711590	O	13	SN1140241238	AZ11191696	N/A	N/A	N/A	5	Compound	20.3663
1093711507	G	21	SN0044524957	AZ10356733	ZAP70	7535	5.72	5	Compound	20.3608
1093711675	F	9	SN1037889758	AZ10010806	CA2	760	8.62	5	Compound	20.354
1093711705	M	2	SN1025696075	AZ10926018	TRPC6	7225	5.68	5	Compound	20.3014
1093711620	K	14	SN1123533960	AZ13783917	KCNH2	3757	4.23	5	Compound	20.2531
1093711712	H	16	SN1086109311	AZ13042257	CCNB1	891	8.52	5	Compound	20.2502
1093711477	K	6	SN1055631246	AZ12464294	MCHR1	2847	9.22	5	Compound	20.169
1093711750	J	22	SN0166077091	AZ10617460	TPSAB1	7177	6.33	5	Compound	20.1681
1093713808	I	12	SN1050155242	AZ13767102	MAP4K4	9448	9.7	5	Compound	20.1668
1093711743	O	18	SN1029369044	AZ13374414	CHRM5	1133	9.68	5	Compound	20.1131
1093711446	N	17	SN0039339646	AZ10292959	CYP19A1	1588	8.7	5	Compound	20.0567
1093713808	O	18	SN1140246881	AZ14106082	POLQ	10721	4.63	5	Compound	20.0563
1093711491	M	5	SN1123526680	AZ12631914	HTT	3064	5.5	5	Compound	20.0126
1093711552	N	19	SN1081349343	AZ12967590	KCNH2	3757	4.55	5	Compound	20.0087
1093711545	E	20	SN1043165760	AZ12225557	KIF11	3832	8.75	5	Compound	19.9962
1093711705	N	22	SN1060629816	AZ12557027	CDK2	1017	6.44	5	Compound	19.9684
1093711569	C	3	SN1058909911	AZ12524934	GCK	2645	6.9	5	Compound	19.9655
1093711408	H	15	SN0039339750	AZ10292964	TNKS	8658	6.55	5	Compound	19.9623
1093711460	D	4	SN1053490513	AZ11124101	DRD2	1813	9.05	5	Compound	19.9598
1093713891	L	14	SN1017897376	AZ13198221	SLC6A2	6530	5.89	5	Compound	19.9513
1093711569	B	14	SN1068838002	AZ12708196	TAS1R2	80834	5.63	5	Compound	19.9325
1093711668	O	12	SN0038782952	AZ10281190	HRH1	3269	9.7	5	Compound	19.87
1093711606	C	4	SN1061827266	AZ12577528	PIK3CD	5293	8.4	5	Compound	19.8285
1093713877	K	16	SN1013615220	AZ12203721	VDR	7421	8.46	5	Compound	19.8156
1093711521	J	9	SN1006027587	AZ12134895	GMNN	51053	6.39	5	Compound	19.8142
1093713839	D	13	SN0124535938	AZ10179467	EGFR	1956	9.85	5	Compound	19.6977
1093711606	L	12	SN1071846982	AZ12770267	FASN	2194	7.95	5	Compound	19.6935
1093711484	L	2	SN1094653338	AZ13284939	CYP2D6	1565	7.2	5	Compound	19.6802
1093711446	E	10	SN1081855483	AZ12978926	CHRM4	1132	8.12	5	Compound	19.6576
1093711590	C	2	SN1069180010	AZ12715390	ADRBK1	156	5.13	5	Compound	19.6511
1093711705	N	5	SN0030321118	AZ10122276	RARB	5915	9.4	5	Compound	19.6323
1093711675	K	22	SN0183657372	AZ10413872	RAB9A	9367	5.55	5	Compound	19.629
1093711422	G	20	SN1003535207	AZ10897522	GRIN2A	2903	6.67	5	Compound	19.6198
1093711590	M	19	SN1107819462	AZ13677028	APOE	348	4.68	5	Compound	19.6015
1093713808	F	2	SN1094417751	AZ13248596	GSK3A	2931	8.31	5	Compound	19.591
1093711668	D	3	SN1151672142	AZ14132233	N/A	N/A	N/A	5	Compound	19.5688
1093711613	M	20	SN1105121827	AZ13592699	ARF1	375	6.21	5	Compound	19.5352
1093711743	L	2	SN1057822505	AZ12504372	MAP2K1	5604	9	5	Compound	19.5153
1093713778	J	17	SN1033877690	AZ13507941	PIK3CD	5293	8.14	5	Compound	19.4712
1093711712	D	18	SN1151667268	AZ14132153	MLL	4297	8.51	5	Compound	19.465
1093711460	N	15	SN0211459118	AZ10002091	GRIN1	2902	7.17	5	Compound	19.4449
1093711705	H	23	SN1051795761	AZ13813146	CDK17	5128	9.31	5	Compound	19.4201
1093713877	I	12	11711	N/A	N/A	N/A	N/A	5	Compound	19.3985
1093713860	J	12	SN1028438877	AZ13546398	CHRNA7	1139	9.7	5	Compound	19.3337
1093711613	I	15	SN1002611919	AZ10875547	NR1H2	7376	4.33	5	Compound	19.2456
1093711477	M	11	SN1138069144	AZ14102060	BTK	695	9.3	5	Compound	19.2298
1093713907	N	5	SN1031297502	AZ13381827	KCNA5	3741	6.32	5	Compound	19.2255
1093711606	J	6	SN0019951935	AZ10224623	MTNR1B	4544	5.68	5	Compound	19.2148
1093711606	B	19	SN1056970889	AZ12488786	CLK2	1196	7.56	5	Compound	19.2087
1093711729	N	5	SN1140237761	AZ14105909	ALK	238	7.68	5	Compound	19.2085
1093711392	E	21	13330	N/A	N/A	N/A	N/A	5	Compound	19.1599
1093711736	B	21	SN0016228465	AZ10757796	ALOX5	240	6.3	5	Compound	19.1595
1093713860	D	6	SN1083168568	AZ13006252	XDH	7498	8.28	5	Compound	19.0926
1093711521	F	9	SN0203586179	AZ10416645	CHEK2	11200	8.67	5	Compound	19.0728
1093711514	D	10	SN1048577491	AZ12336075	KRAS	3845	6.05	5	Compound	19.0698
1093711682	N	4	SN0151818659	AZ12093389	CHRNA4	1137	8.4	5	Compound	19.0251
1093713846	B	21	SN0111350843	AZ10014104	MTNR1A	4543	9.82	5	Compound	19.0203
1093711729	O	18	SN1050182063	AZ12363387	NAMPT	10135	7.72	5	Compound	19.0099
1093711750	M	23	SN1107816716	AZ13676995	HDAC6	10013	5.19	5	Compound	18.9965
1093713778	G	8	SN0179851935	AZ10244831	CSK	1445	8.33	5	Compound	18.9839
1093713884	D	20	SN1056634543	AZ12482381	MAP2K1	5604	6.66	5	Compound	18.9743
1093711569	D	14	SN1001711647	AZ12859669	CSF1R	1436	8.42	5	Compound	18.9642
1093711477	M	5	SN1089569843	AZ13136044	RYR2	6262	7	5	Compound	18.9516
1093713884	K	7	SN1077098846	AZ12810522	PDGFRB	5159	8.68	5	Compound	18.8942
1093711569	B	9	SN0150723558	AZ10524674	N/A	N/A	N/A	5	Compound	18.8941
1093711477	G	6	SN1015498980	AZ13102947	TBK1	29110	8.3	5	Compound	18.8803
1093711576	C	15	SN1059803711	AZ12489875	SRC	6714	8.98	5	Compound	18.8685
1093711576	J	18	SN1123535979	AZ13783728	ITGAL	3683	8.6	5	Compound	18.8427
1093711538	C	6	SN1062847246	AZ12594799	P2RY12	64805	10	5	Compound	18.8043
1093713860	H	2	SN1002034310	AZ10531701	ADRB1	153	5.92	5	Compound	18.7622
1093711521	G	15	SN1107815895	AZ13676985	N/A	N/A	N/A	5	Compound	18.7542
1093711668	L	2	SN1140250344	AZ14106129	HCRTR2	3062	7.5	5	Compound	18.7366
1093711422	M	11	SN0071998524	AZ10366043	TWF2	11344	6	5	Compound	18.7318
1093711545	K	14	SN0182202155	AZ12059189	GRM2	2912	7.23	5	Compound	18.7099
1093713822	D	13	11894	N/A	N/A	N/A	N/A	5	Compound	18.692
1093713815	O	21	11562	N/A	N/A	N/A	N/A	5	Compound	18.6799
1093713778	J	2	SN1081520071	AZ12361854	CYP2C19	1557	5.19	5	Compound	18.599
1093711460	H	9	SN0178955625	AZ10351732	N/A	N/A	N/A	5	Compound	18.5593
1093711699	O	14	SN1041542457	AZ11985626	P2RX7	5027	7.4	5	Compound	18.556
1093711705	G	21	SN1049565341	AZ12353713	GPR44	11251	9	5	Compound	18.54
1093711521	G	17	SN1013965061	AZ13074776	MTOR	2475	8.95	5	Compound	18.5325
1093711729	C	7	SN1077724424	AZ11343761	NR3C1	2908	8.89	5	Compound	18.4535
1093711569	O	13	SN1068383048	AZ12698597	RET	5979	8.87	5	Compound	18.4392
1093711750	E	9	SN1088755533	AZ13110198	GABBR1	2550	6.41	5	Compound	18.4292
1093711491	O	13	SN0208924898	AZ11924382	GLRA1	2741	5.09	5	Compound	18.396
1093713822	F	13	11934	N/A	N/A	N/A	N/A	5	Compound	18.3723
1093711507	F	17	SN0182866874	AZ11750802	DNAH8	1769	5.32	5	Compound	18.3448
1093711644	C	17	SN1060864285	AZ12561195	CCNE1	898	8.28	5	Compound	18.2856
1093711613	L	22	SN1038791764	AZ13040866	IRAK1	3654	8.66	5	Compound	18.2614
1093713808	M	13	8130	N/A	N/A	N/A	N/A	5	Compound	18.2203
1093711514	N	2	SN1040955506	AZ12240716	ESR2	2100	5.6	5	Compound	18.2078
1093713907	K	14	SN1056771066	AZ13833355	CASR	846	6	5	Compound	18.1955
1093713815	D	2	SN1055690912	AZ13821380	RARG	5916	7.94	5	Compound	18.1804
1093711613	C	21	SN1077282011	AZ12881284	KCNA5	3741	6.89	5	Compound	18.1719
1093711507	J	10	SN1123524585	AZ13783574	RXRA	6256	8.52	5	Compound	18.1697
1093711712	H	18	SN1089190383	AZ10538916	TDP1	55775	5.27	5	Compound	18.1672
1093711453	J	8	SN0030377834	AZ10124205	BLVRA	644	8.07	5	Compound	18.1489
1093711644	M	8	SN0212318514	AZ12021180	HTT	3064	6.5	5	Compound	18.107
1093713853	D	23	SN1024280806	AZ12128960	CYP2C19	1557	4.59	5	Compound	18.067
1093711590	N	3	SN0039752793	AZ11666244	PSEN1	5663	7.71	5	Compound	18.0579
1093713860	F	14	SN1085309273	AZ12496625	SLCO1B3	28234	5.6	5	Compound	18.0559
1093713815	L	13	11494	N/A	N/A	N/A	N/A	5	Compound	18.027
1093713822	K	16	SN0210071846	AZ11957351	HPGD	3248	7.72	5	Compound	18.021
1093711675	L	20	SN1101721960	AZ13211312	CYP3A4	1576	5.14	5	Compound	18.0159
1093711644	N	18	SN0202194156	AZ11569204	IKBKB	3551	8.43	5	Compound	18.0126
1093711712	I	3	SN1068284634	AZ12696804	CHUK	1147	7.15	5	Compound	17.9803
1093711385	I	7	7758	N/A	N/A	N/A	N/A	5	Compound	17.9662
1093713846	O	21	SN1101487769	AZ11967236	TARDBP	23435	5.5	5	Compound	17.9431
1093711415	C	17	SN0150537440	AZ11939571	DRD2	1813	9.15	5	Compound	17.9113
1093713839	K	21	SN0032685582	AZ10178331	BRAF	673	7.76	5	Compound	17.8938
1093711408	F	9	SN0024646152	AZ10154892	GNPNAT1	64841	4.96	5	Compound	17.8874
1093711385	E	16	SN1003330042	AZ10894793	HPGD	3248	6.28	5	Compound	17.8788
1093713877	O	12	SN1059092434	AZ12528682	SCN2A	6326	6.14	5	Compound	17.8675
1093711415	B	14	SN1082061299	AZ12929125	ESR1	2099	5.62	5	Compound	17.8287
1093711446	N	12							Neutral Control	17.8284
1093711453	N	10	SN0151148637	AZ11351613	DNMT1	1786	3	5	Compound	17.8219
1093711545	K	23	SN1036980517	AZ13550812	EGFR	1956	9.7	5	Compound	17.8094
1093711750	N	17	SN0152969943	AZ11165731	ITGA2B	3674	8.62	5	Compound	17.7574
1093713907	E	9	SN1086844801	AZ12640834	PARP1	142	8	5	Compound	17.7424
1093713891	N	8	SN1000895733	AZ13242352	BACE1	23621	8.32	5	Compound	17.7259
1093713877	D	2	SN0013870979	AZ10096533	CYP3A4	1576	9.6	5	Compound	17.715
1093711729	H	23	SN1072460010	AZ12714250	NTRK1	4914	9.62	5	Compound	17.7099
1093713815	H	4							Neutral Control	17.6842
1093711422	F	13	SN1123539532	AZ10428861	KCNH2	3757	4.09	5	Compound	17.6704
1093713877	H	12							Neutral Control	17.6629
1093711651	I	17	SN1050804750	AZ13770261	MAP3K14	9020	7.7	5	Compound	17.645
1093713907	M	5	SN0150287873	AZ12045163	BLM	641	7.8	5	Compound	17.6359
1093711446	M	14	SN0153988347	AZ10152887	TRPA1	8989	6.57	5	Compound	17.5926
1093711453	N	19	SN0030801219	AZ10092808	CYP1A2	1544	6.84	5	Compound	17.5883
1093711606	N	11	SN0024698027	AZ10346923	EHMT2	10919	5.45	5	Compound	17.5812
1093711712	O	14	SN0016871259	AZ10066677	CXCR2	3579	5.17	5	Compound	17.5688
1093713877	O	6	SN1063282884	AZ12602625	FLT1	2321	4.82	5	Compound	17.5572
1093711699	D	17	SN1094624223	AZ13283440	XDH	7498	8.9	5	Compound	17.5224
1093711743	O	4	SN0176588170	AZ10591336	SCN5A	6331	5.99	5	Compound	17.4995
1093711545	N	15	SN0024207202	AZ10185925	DNM1	1759	5.24	5	Compound	17.4822
1093711736	O	10	SN0029965560	AZ10004773	PTGS1	5742	7.2	5	Compound	17.4559
1093711569	F	11	SN0151818230	AZ12093406	NR1H2	7376	9	5	Compound	17.4075
1093711422	C	9	SN0040090734	AZ10308458	SLC1A5	6510	2.52	5	Compound	17.4048
1093711439	D	2	SN1105187814	AZ13595074	TUBB2B	347733	6.6	5	Compound	17.3996
1093711507	C	7	SN1062462516	AZ12587898	GSK3B	2932	6.75	5	Compound	17.3929
1093711590	B	5	SN1107819613	AZ13677031	ADRBK1	156	5.51	5	Compound	17.3913
1093711439	I	7	SN1057821821	AZ12504253	P2RX3	5024	5.73	5	Compound	17.3856
1093713907	K	10	SN1036490909	AZ13552713	N/A	N/A	N/A	5	Compound	17.3736
1093711682	M	3	SN1086024159	AZ13040811	SIRT2	22933	5.6	5	Compound	17.3713
1093711415	K	14	SN1041118738	AZ13653551	FABP7	2173	7.32	5	Compound	17.3711
1093711620	O	8	SN1062843014	AZ12594721	S1PR1	1901	8.31	5	Compound	17.37
1093711408	D	6	SN0135713312	AZ10056274	SLC6A3	6531	5.38	5	Compound	17.344
1093711620	O	21	SN1063991303	AZ14128496	IRAK4	51135	8.66	5	Compound	17.3205
1093711637	O	17	SN0031445825	AZ10027557	CASP3	836	9.7	5	Compound	17.2999
1093711699	I	20	SN1057800000	AZ12504006	CCNB1	891	8.88	5	Compound	17.2931
1093711613	N	21	SN1123539428	AZ13783787	HRH1	3269	7.82	5	Compound	17.2752
1093711606	K	16	SN0209494416	AZ11964786	ESR1	2099	6.59	5	Compound	17.2474
1093713860	O	9	SN1057817570	AZ12504188	RGS4	5999	8.22	5	Compound	17.2291
1093711590	O	18	SN0185722597	AZ10416158	CPT1B	1375	6	5	Compound	17.2194
1093713778	F	15	SN1056927634	AZ12488005	RAC1	5879	4.9	5	Compound	17.1985
1093711651	C	14	SN1061356540	AZ10234470	CSK	1445	7.44	5	Compound	17.1889
1093711415	E	22	SN1047419333	AZ12312253	CNR1	1268	8.11	5	Compound	17.1851
1093711439	J	19	7510	N/A	N/A	N/A	N/A	5	Compound	17.1753
1093711507	L	9	SN0031614444	AZ11719959	PDK1	5163	6.96	5	Compound	17.1568
1093711705	O	5	SN1030390194	AZ13436264	ATR	545	7.86	5	Compound	17.1262
1093711392	D	11	13302	N/A	N/A	N/A	N/A	5	Compound	17.1254
1093711699	N	10	SN1015228242	AZ11152431	MAOB	4129	7.14	5	Compound	17.1052
1093713822	E	16	SN1122304493	AZ13745045	PLK1	5347	8.05	5	Compound	17.0698
1093711637	O	4	SN1083958547	AZ13014091	TAAR1	134864	7.22	5	Compound	17.062
1093713860	E	9	SN1122318784	AZ13745230	HRH1	3269	8.41	5	Compound	17.0613
1093711408	O	17	SN1140244267	AZ14106035	KCNH2	3757	5.06	5	Compound	17.0513
1093711750	B	19	SN0186895721	AZ10416900	GRM5	2915	4.96	5	Compound	17.0271
1093713884	O	14	SN1035758027	AZ10007315	PRKCI	5584	3	5	Compound	17.0255
1093713877	J	2	SN0072176650	AZ10377092	GPR119	139760	8.6	5	Compound	17.025
1093713839	D	2	SN1057355888	AZ12495608	TBXAS1	6916	8.22	5	Compound	17.0194
1093713853	O	21	SN0030708330	AZ10153025	SYK	6850	6.52	5	Compound	17.0131
1093711590	M	4	SN0046368098	AZ11942905	GABRA4	2557	7.15	5	Compound	16.9583
1093713815	O	17	11558	N/A	N/A	N/A	N/A	5	Compound	16.9017
1093711408	F	13	SN0029882937	AZ11668505	ACVR2B	93	5.95	5	Compound	16.9013
1093711675	K	10	SN1108931100	AZ13701042	MAP4K1	11184	7.92	5	Compound	16.9006
1093711408	D	4	SN1046185129	AZ10203301	GPR109B	8843	6.4	5	Compound	16.8931
1093713860	N	8	SN1071459907	AZ12761883	SRC	6714	8.76	5	Compound	16.8822
1093711729	O	5	SN0188385488	AZ10383718	EGFR	1956	6.59	5	Compound	16.8632
1093711613	N	17	SN0213353955	AZ12078609	HTR1A	3350	6.42	5	Compound	16.8611
1093711682	N	5	SN0021492200	AZ10210276	AKR1B1	231	9.67	5	Compound	16.829
1093711446	K	17	SN0011654186	AZ10021393	DAO	1610	8.4	5	Compound	16.8146
1093711613	N	18	SN0151329688	AZ10491894	GMNN	51053	6.79	5	Compound	16.808
1093711538	C	3	SN0020470257	AZ10072557	PTPN1	5770	5.67	5	Compound	16.7971
1093711712	O	7	SN1122310603	AZ12495565	HRH2	3274	7.11	5	Compound	16.7941
1093711668	N	14	SN0015021239	AZ10048548	CNR1	1268	6.87	5	Compound	16.7928
1093711453	C	18	SN0198283827	AZ11603272	CHEK1	1111	6	5	Compound	16.788
1093713839	D	10	SN0038771973	AZ10170360	JAK2	3717	4.07	5	Compound	16.7782
1093711675	O	7	SN0039756912	AZ10321685	CYP1B1	1545	7.7	5	Compound	16.768
1093711590	N	9	SN1122307022	AZ13745076	DOT1L	84444	4.45	5	Compound	16.7643
1093711668	I	5	SN1082087730	AZ12983630	PIK3CA	5290	9.4	5	Compound	16.7613
1093711644	O	2							Neutral Control	16.7559
1093713846	B	4	SN1140240554	AZ14105950	KCNH2	3757	5.07	5	Compound	16.7287
1093711743	N	22	SN1078300679	AZ12835927	JAK2	3717	8.52	5	Compound	16.7216
1093711484	F	4	SN1050903026	AZ12377024	CNR1	1268	9.85	5	Compound	16.7004
1093711569	F	5	SN0209972630	AZ11954605	MAP3K8	1326	5.91	5	Compound	16.6782
1093711682	K	8	SN0044298669	AZ10217852	TRPV1	7442	5.6	5	Compound	16.6746
1093713815	C	14	11309	N/A	N/A	N/A	N/A	5	Compound	16.6434
1093713914	J	7	SN0150734806	AZ10457096	PIK3CA	5290	5.07	5	Compound	16.6188
1093713907	B	7	SN1030261910	AZ13395437	KCNA5	3741	5.77	5	Compound	16.5751
1093713808	E	3	7958	N/A	N/A	N/A	N/A	5	Compound	16.5642
1093713891	K	15	SN1017545945	AZ11188363	CYP2D6	1565	6.78	5	Compound	16.523
1093711422	M	17	SN0167326048	AZ10582206	METAP2	10988	4.94	5	Compound	16.5103
1093711606	C	6	SN1058643708	AZ12520229	BRAF	673	8.11	5	Compound	16.4814
1093713860	F	20	SN1104819970	AZ13581693	GRM4	2914	8.05	5	Compound	16.4528
1093711484	I	20	SN1079567301	AZ10941658	N/A	N/A	N/A	5	Compound	16.4269
1093711439	O	7	SN1049741419	AZ10285447	P2RY2	5029	6.98	5	Compound	16.4052
1093711415	F	15	SN0029791029	AZ10311430	CYP1B1	1545	7.92	5	Compound	16.3968
1093711446	N	11	SN0046023684	AZ10168117	HPGDS	27306	6.04	5	Compound	16.3758
1093711682	O	16	SN1088927879	AZ10006979	LMNA	4000	8.35	5	Compound	16.351
1093711460	J	18	SN1015020746	AZ12129399	ADRB2	154	9.49	5	Compound	16.3473
1093711545	B	10	SN1058081574	AZ12449774	PIK3CB	5291	10	5	Compound	16.3128
1093711552	M	14	SN1063995653	AZ14115905	BRD4	23476	8.1	5	Compound	16.3095
1093711729	N	2	SN1123534809	AZ12632282	LMNA	4000	9.52	5	Compound	16.2981
1093713860	L	2	SN1126886599	AZ13836131	HCRTR1	3061	8.7	5	Compound	16.2938
1093711576	N	15	SN0166650199	AZ11797308	MAPK8	5599	7.08	5	Compound	16.293
1093711453	L	2	SN0124411216	AZ11942648	PDK1	5163	7.8	5	Compound	16.2741
1093713907	M	12	SN0039250904	AZ11871416	PTPRC	5788	6.22	5	Compound	16.2569
1093711514	G	3	SN1005647226	AZ10981857	CHRM1	1128	7.09	5	Compound	16.2507
1093713914	M	20	SN0214328297	AZ12166274	ACVRL1	94	8.41	5	Compound	16.2491
1093713860	C	18	SN1101558927	AZ10317089	PTK2	5747	6.07	5	Compound	16.2479
1093711446	N	2	SN1081840838	AZ12978253	GCK	2645	5.48	5	Compound	16.2451
1093711712	O	15	SN1058384612	AZ13852087	DDR1	780	7.07	5	Compound	16.2352
1093713778	M	2	SN0211077922	AZ11169613	PLA2G10	8399	4.07	5	Compound	16.2254
1093713846	M	12	SN1047334324	AZ13769642	SYK	6850	9.66	5	Compound	16.2166
1093713846	M	22	SN1071862594	AZ12770477	CHRM1	1128	8.47	5	Compound	16.213
1093711750	N	2	SN1020227502	AZ12631748	GMNN	51053	6.94	5	Compound	16.2097
1093711682	O	4	SN0039563542	AZ10420692	SLC6A1	6529	4.45	5	Compound	16.2073
1093711552	M	5	SN1151672156	AZ14132234	MAPK14	1432	8.21	5	Compound	16.1809
1093713822	F	14	SN1064600725	AZ10951631	HIF1A	3091	7.3	5	Compound	16.1526
1093711606	D	6	SN1056303514	AZ12475636	SOAT1	6646	8.45	5	Compound	16.1424
1093711729	I	16	SN1140251278	AZ14106161	KCNJ3	3760	6.8	5	Compound	16.1219
1093713877	J	20	SN1140243347	AZ13595102	MAPK1	5594	6.95	5	Compound	16.0906
1093711552	N	20	SN1046817704	AZ12301810	LIG1	3978	7.53	5	Compound	16.0854
1093711606	J	15	SN1027329479	AZ11350928	CACNA1B	774	5.79	5	Compound	16.0736
1093711644	M	6	SN0016495517	AZ10456443	KCNMB4	27345	5.22	5	Compound	16.0719
1093711712	N	9	SN1123572077	AZ12285483	N/A	N/A	N/A	5	Compound	16.069
1093711712	O	12	SN0191650782	AZ11803545	NOS2	4843	5.2	5	Compound	16.0544
1093711385	L	22	7835	N/A	N/A	N/A	N/A	5	Compound	16.0391
1093711743	I	21	SN1024900038	AZ11306133	LIMK1	3984	5.6	5	Compound	16.0334
1093711750	F	18	SN1037370101	AZ11827947	FAAH	2166	7	5	Compound	16.0138
1093711705	D	20	SN1138070064	AZ14102080	SRPK1	6732	6.71	5	Compound	16.0003
1093711750	C	15	SN1060631137	AZ12557057	CSF1R	1436	7.31	5	Compound	15.9926
1093711521	F	5	SN1044414690	AZ13726294	CCNT1	904	9.3	5	Compound	15.9856
1093713815	F	3	11360	N/A	N/A	N/A	N/A	5	Compound	15.9597
1093711729	D	4	SN1151672288	AZ14132237	SCN10A	6336	7.28	5	Compound	15.9463
1093711446	O	11	SN0029093614	AZ10242904	OPRK1	4986	6.8	5	Compound	15.9383
1093711446	L	17							Neutral Control	15.8993
1093711484	L	13	SN1041329257	AZ10001182	SCN9A	6335	7.25	5	Compound	15.8948
1093713914	M	17	SN1017941306	AZ13224686	ACVRL1	94	7.98	5	Compound	15.8917
1093713822	E	22	11921	N/A	N/A	N/A	N/A	5	Compound	15.8661
1093713846	N	9	SN0025478079	AZ10015823	FASN	2194	5.21	5	Compound	15.8498
1093711569	B	22							Neutral Control	15.8484
1093711743	O	21	SN1070311591	AZ12738945	NTRK1	4914	9.4	5	Compound	15.8428
1093711620	K	15	SN1057371637	AZ12280424	AXL	558	8.52	5	Compound	15.8345
1093711668	L	4	SN1027594027	AZ13415054	AK1	203	5.6	5	Compound	15.829
1093711750	M	20	SN1078544273	AZ12907526	DNAH8	1769	6.9	5	Compound	15.8165
1093713914	J	17	SN1089536760	AZ13134808	KAT2A	2648	5.55	5	Compound	15.8097
1093711392	C	19	13288	N/A	N/A	N/A	N/A	5	Compound	15.804
1093713778	I	17	SN1079596402	AZ12930634	GSK3A	2931	9.25	5	Compound	15.7989
1093711422	K	9	SN0209466754	AZ11865922	FAAH	2166	7.19	5	Compound	15.7938
1093713907	K	4	SN1031568102	AZ13565043	CARM1	10498	5.8	5	Compound	15.7496
1093711699	D	9	SN1001622235	AZ13206387	PIK3CA	5290	8.5	5	Compound	15.7425
1093713853	B	12	SN0025979855	AZ10051410	AHR	196	6.94	5	Compound	15.7422
1093713907	F	5	SN1075782581	AZ12497020	GSK3B	2932	7.26	5	Compound	15.7265
1093713846	C	6	SN1122318534	AZ13745225	ERBB2	2064	4.82	5	Compound	15.7182
1093711453	F	12	SN1032401420	AZ11140587	CX3CR1	1524	7.46	5	Compound	15.7178
1093711705	K	9	SN1070976475	AZ12752219	SRC	6714	8.37	5	Compound	15.7086
1093711705	N	15	SN1151660526	AZ14132035	N/A	N/A	N/A	5	Compound	15.7072
1093711750	K	11	SN0056407309	AZ10266007	NUDT1	4521	8.78	5	Compound	15.7063
1093711385	O	6	7881	N/A	N/A	N/A	N/A	5	Compound	15.6665
1093711538	C	18	SN1055411271	AZ12459960	JAK2	3717	9.4	5	Compound	15.662
1093713884	C	19	SN0031152451	AZ10045927	SYK	6850	7.39	5	Compound	15.6444
1093711422	M	21	SN0150461828	AZ11149982	NR3C2	4306	6.31	5	Compound	15.6374
1093711606	H	2	SN0150727630	AZ10524716	N/A	N/A	N/A	5	Compound	15.6357
1093713860	C	7	SN0055342215	AZ10244515	P2RX3	5024	5.65	5	Compound	15.6228
1093711637	N	10	SN1021726776	AZ13265633	MET	4233	7.3	5	Compound	15.5734
1093711521	D	8	SN1058330760	AZ13851196	MBNL1	4154	5	5	Compound	15.5637
1093711521	M	10	SN1122310320	AZ13745120	N/A	N/A	N/A	5	Compound	15.5549
1093711675	J	22	SN1047648801	AZ12317420	N/A	N/A	N/A	5	Compound	15.5368
1093711750	C	19	SN0024499887	AZ10342103	APOBEC3A	200315	5.53	5	Compound	15.5353
1093711590	M	8	SN1123538626	AZ13783773	KCNH2	3757	5.22	5	Compound	15.5298
1093711590	O	17	SN1049309722	AZ13756064	PIK3CD	5293	9.1	5	Compound	15.5174
1093711637	F	22	SN1014789562	AZ13115610	GCK	2645	7.23	5	Compound	15.5102
1093711699	C	20	SN0180198175	AZ10381311	FFAR1	2864	7.43	5	Compound	15.5089
1093711620	B	13	SN0199185945	AZ11944850	CYP2D6	1565	5.96	5	Compound	15.4977
1093711637	F	17	SN0179157700	AZ10361717	GPR119	139760	5.42	5	Compound	15.4937
1093713877	H	15	SN0013829550	AZ10113217	TTR	7276	5.74	5	Compound	15.4674
1093711439	L	2	SN1089542601	AZ12412938	THRB	7068	7.85	5	Compound	15.4547
1093711613	M	10	SN1018351141	AZ12761427	PIK3CA	5290	5.53	5	Compound	15.443
1093711460	L	21	SN1041748279	AZ13594945	FGFR2	2263	9	5	Compound	15.4426
1093711569	N	7	SN1123538461	AZ13783768	TGFBR1	7046	6.6	5	Compound	15.4347
1093711699	O	11	SN1057812550	AZ11343358	NQO2	4835	8.57	5	Compound	15.4278
1093711736	E	21	SN1110409591	AZ13721572	GSK3B	2932	7.95	5	Compound	15.4217
1093711521	M	4	SN0039254452	AZ12103668	ESR1	2099	8.27	5	Compound	15.4148
1093711620	E	16	SN1140240153	AZ14105946	PKD1	5310	8	5	Compound	15.3641
1093713808	D	16	7949	N/A	N/A	N/A	N/A	5	Compound	15.3573
1093713891	K	5	SN1030182395	AZ11141646	GSK3B	2932	8.8	5	Compound	15.3468
1093713860	J	6	SN1122305729	AZ13745060	EGFR	1956	10	5	Compound	15.3352
1093713822	N	11	12098	N/A	N/A	N/A	N/A	5	Compound	15.3319
1093711699	K	9	SN1022671116	AZ12504144	HTR4	3360	9.4	5	Compound	15.3132
1093711521	B	16	SN1071630484	AZ12211327	SRPK1	6732	5.94	5	Compound	15.3119
1093711491	O	17	SN1123526727	AZ12627124	CDK2	1017	7	5	Compound	15.3103
1093711491	O	22							Neutral Control	15.2936
1093713853	B	6	SN1107819476	AZ13677029	BRD3	8019	5.66	5	Compound	15.2876
1093711491	H	2	SN1089190935	AZ10186000	SHBG	6462	8.51	5	Compound	15.273
1093713822	H	3	11968	N/A	N/A	N/A	N/A	5	Compound	15.2723
1093711392	I	13	13404	N/A	N/A	N/A	N/A	5	Compound	15.2713
1093711606	K	15	SN1040887534	AZ13635305	SLC34A1	6569	8.44	5	Compound	15.2484
1093713860	O	16	SN1122623807	AZ12632292	KCNH2	3757	4.3	5	Compound	15.2446
1093711422	B	12	SN1071751389	AZ12768207	N/A	N/A	N/A	5	Compound	15.2396
1093711446	H	9	SN1122308876	AZ13745103	TRPA1	8989	5.99	5	Compound	15.2317
1093713846	N	14	SN1114241652	AZ13725723	N/A	N/A	N/A	5	Compound	15.231
1093711453	F	14	SN0012028239	AZ12122235	NR3C1	2908	7.2	5	Compound	15.2197
1093711590	F	6	SN0206473504	AZ10165426	EHMT2	10919	7.65	5	Compound	15.2171
1093713907	H	17	SN1123532120	AZ13783664	CDK2	1017	4.69	5	Compound	15.2141
1093713884	N	10	SN1109429587	AZ13713444	SLC28A2	9153	6.74	5	Compound	15.2085
1093711521	N	3	SN1027244588	AZ13429087	PI4KA	5297	4.99	5	Compound	15.2066
1093711668	M	14	SN0199183020	AZ12118954	KPNB1	3837	6.69	5	Compound	15.1906
1093711712	K	19	SN1038932905	AZ13665898	RORC	6097	7.96	5	Compound	15.1622
1093711521	K	5	SN1122317331	AZ12631868	SLC6A3	6531	4.5	5	Compound	15.1618
1093711590	C	3	SN1094559392	AZ13281911	CCR2	729230	6.69	5	Compound	15.1549
1093711606	K	11	SN1031016692	AZ12996525	HRH3	11255	9.3	5	Compound	15.1542
1093711460	D	20	SN0018025468	AZ11149888	GNAS	2778	5.15	5	Compound	15.1469
1093711750	M	10	SN1023317444	AZ13285525	MCHR1	2847	8.4	5	Compound	15.1456
1093711675	F	2	SN0037198007	AZ10493009	ADRBK1	156	6.52	5	Compound	15.1445
1093713907	J	14	SN1073700196	AZ12806962	SRC	6714	9.43	5	Compound	15.1289
1093711521	G	13	SN0029836884	AZ10000114	NR1H4	9971	8.85	5	Compound	15.1257
1093711521	M	20	SN1044795597	AZ10442546	GLP1R	2740	5	5	Compound	15.123
1093711408	O	7	SN1056956603	AZ12488525	KCNH2	3757	5.24	5	Compound	15.102
1093713778	D	7	SN0205569914	AZ11945435	CCR5	1234	9.34	5	Compound	15.0982
1093711408	O	4	SN1123573266	AZ13785255	HTR3A	3359	9.82	5	Compound	15.084
1093711750	D	3	SN0018709918	AZ10227515	ALOX5	240	6.55	5	Compound	15.0716
1093711668	N	2	SN1123529992	AZ13783622	CASR	846	4.85	5	Compound	15.0693
1093711491	I	17	SN0188290537	AZ10739572	HSD11B1	3290	6.3	5	Compound	15.0586
1093711552	E	5	SN1123526189	AZ13124539	AR	367	6.96	5	Compound	15.0554
1093711521	H	15	SN1123540999	AZ13783953	PGR	5241	7.98	5	Compound	15.0387
1093711538	E	5	SN1081855497	AZ12978929	CHRM4	1132	8.12	5	Compound	15.0368
1093711477	I	13	SN1057233289	AZ12493549	DDR2	4921	8.11	5	Compound	15.029
1093711569	B	18	SN1078640314	AZ10176306	EGFR	1956	5.69	5	Compound	15.0247
1093711590	E	11	SN1057818018	AZ12504198	SLC6A1	6529	6.59	5	Compound	15.0243
1093711590	C	14	SN0151329556	AZ11641704	ADORA3	140	5.19	5	Compound	15.0126
1093711729	N	4	SN0151368046	AZ12135690	CHRNA7	1139	7.44	5	Compound	15.0118
1093713846	K	4	SN0031978556	AZ12168937	OPRD1	4985	6.23	5	Compound	15.0089
1093713907	I	5	SN1140248872	AZ14106135	PKM2	5315	8.2	5	Compound	15.0021
1093711590	O	21	SN0031937556	AZ10488474	N/A	N/A	N/A	5	Compound	14.9925
1093711477	K	3	SN1056502160	AZ14124230	AKT1	207	7.62	5	Compound	14.96
1093711590	L	5	SN1084776391	AZ12967009	GPR119	139760	6.67	5	Compound	14.9542
1093711491	B	8	SN0152099568	AZ10531526	ADORA3	140	7.68	5	Compound	14.9464
1093711514	L	23	SN1070519120	AZ12742651	CHRM1	1128	7.98	5	Compound	14.945
1093711637	M	3	SN0188078007	AZ11568926	FZD8	8325	4.6	5	Compound	14.9196
1093711439	L	19	SN1049822749	AZ12356336	CCR8	1237	9.77	5	Compound	14.9127
1093711521	L	9	SN1013183545	AZ11123162	HTR7	3363	7.76	5	Compound	14.9025
1093711552	C	2	SN1062890610	AZ12595554	MMP13	4322	5.11	5	Compound	14.8902
1093711453	H	10	SN1028468115	AZ13280267	DYRK1B	9149	8.15	5	Compound	14.881
1093711521	M	17	SN0029998388	AZ10521024	FAAH	2166	4.25	5	Compound	14.8808
1093711712	O	4	SN0023679590	AZ10028267	EGFR	1956	4.02	5	Compound	14.8597
1093711453	M	22	SN1074433209	AZ12773438	CTSK	1513	8.52	5	Compound	14.8553
1093711439	E	19	SN0212193655	AZ12058747	DHODH	1723	6.11	5	Compound	14.8363
1093711682	D	6	SN1101489746	AZ10131765	MAPKAPK2	9261	5.26	5	Compound	14.8194
1093711705	H	9	SN1151658252	AZ14131986	HSD17B13	345275	4.85	5	Compound	14.8144
1093711743	J	23	SN0150419908	AZ10311713	PDE3A	5139	7.54	5	Compound	14.807
1093711705	E	11	SN1140244253	AZ11565178	N/A	N/A	N/A	5	Compound	14.8015
1093713815	E	17							Neutral Control	14.7662
1093711415	O	8	SN1015082081	AZ10565309	SLC6A2	6530	6.49	5	Compound	14.7637
1093711392	K	17	13452	N/A	N/A	N/A	N/A	5	Compound	14.7629
1093711729	H	10	SN1027641348	AZ11353838	PTGS2	5743	5.07	5	Compound	14.7552
1093713778	E	11	SN0021066616	AZ10231779	GNPNAT1	64841	4.89	5	Compound	14.7495
1093713778	M	16	SN1069818940	AZ12729183	AKR1B1	231	9.82	5	Compound	14.7448
1093711712	C	5	SN1045854611	AZ13567232	ATM	472	8.91	5	Compound	14.7427
1093711552	J	5	SN0208749018	AZ11914671	RPS6KB1	6198	7.07	5	Compound	14.7382
1093711606	O	19	SN0025425968	AZ10194318	N/A	N/A	N/A	5	Compound	14.7319
1093711750	M	12	SN1067246400	AZ12676258	ESR1	2099	6.71	5	Compound	14.7204
1093711705	E	9	SN1075156899	AZ12838666	FASN	2194	6.84	5	Compound	14.7079
1093711651	M	20	SN1057734801	AZ10378489	ADORA2A	135	5.66	5	Compound	14.6948
1093711392	H	8	13381	N/A	N/A	N/A	N/A	5	Compound	14.6634
1093711545	B	19	SN1008877008	AZ13089637	CTSK	1513	7.28	5	Compound	14.6613
1093711675	L	19	SN1125637288	AZ13812481	MAPK11	5600	7.3	5	Compound	14.6553
1093711453	L	19	SN1078238080	AZ12543335	ITGA5	3678	8.23	5	Compound	14.6516
1093713914	M	2	SN1126947151	AZ13839016	SCN9A	6335	7.06	5	Compound	14.6348
1093711606	F	16	SN1024637913	AZ13292738	MTOR	2475	9.52	5	Compound	14.6346
1093711569	O	9	SN1092421735	AZ13210226	GPR120	338557	5.71	5	Compound	14.6307
1093711750	N	6	SN0067271889	AZ10298365	PRKCI	5584	3.31	5	Compound	14.6299
1093713815	L	22	11501	N/A	N/A	N/A	N/A	5	Compound	14.6258
1093711675	G	7	SN1098905958	AZ13410971	PIK3C2G	5288	8.49	5	Compound	14.6252
1093711644	C	15	SN1122318652	AZ13745227	NAMPT	10135	9.85	5	Compound	14.6202
1093713891	N	15	SN1090321346	AZ13155892	IL2	3558	5.52	5	Compound	14.6154
1093711705	E	3	SN0023679118	AZ10240299	HDAC5	10014	6.85	5	Compound	14.6119
1093711644	O	5	SN1044204448	AZ13704019	KDM4DL	390245	5.15	5	Compound	14.6117
1093711651	N	6	SN0115907250	AZ10032923	MAPK14	1432	8	5	Compound	14.5988
1093711705	D	11	SN0038617513	AZ10046119	LCK	3932	9.42	5	Compound	14.5888
1093711699	E	21	SN0180429101	AZ10090950	HDAC1	3065	2.9	5	Compound	14.5851
1093711477	G	19	SN0014950171	AZ10094553	GABRA1	2554	7.24	5	Compound	14.581
1093711521	O	12	SN1068006103	AZ12691164	CHRM1	1128	7.01	5	Compound	14.5784
1093713778	F	13	SN1059309196	AZ12450108	GABRA2	2555	9.11	5	Compound	14.5692
1093711552	H	2	SN0151323465	AZ12064943	SLCO1B1	10599	5.6	5	Compound	14.5674
1093713815	O	16	11557	N/A	N/A	N/A	N/A	5	Compound	14.5673
1093711491	M	7	SN1001294451	AZ10853342	ACAT1	38	7.92	5	Compound	14.5509
1093711453	H	9	SN1014871155	AZ11866560	CYP3A4	1576	8.9	5	Compound	14.5505
1093711606	M	20	SN0029697234	AZ10001975	CCNE1	898	8	5	Compound	14.5446
1093711729	F	21	SN1073706957	AZ11754118	PLA2G10	8399	6.59	5	Compound	14.534
1093711545	C	20	SN1015892061	AZ13080475	GABRA2	2555	6.07	5	Compound	14.5305
1093711576	O	21	SN1047826574	AZ13723464	ESR1	2099	9.74	5	Compound	14.5254
1093713808	F	3	7976	N/A	N/A	N/A	N/A	5	Compound	14.5191
1093711705	N	9	SN1151658370	AZ14131988	BCKDK	10295	5.06	5	Compound	14.5126
1093711613	K	21	SN1026256737	AZ10930384	GCKR	2646	5.27	5	Compound	14.5088
1093711675	M	6	SN1123577234	AZ13647575	CYP3A4	1576	6.4	5	Compound	14.4884
1093711750	H	14	SN1151683654	AZ14132529	PIK3CA	5290	8.52	5	Compound	14.4867
1093711729	L	10	SN1140253019	AZ14106221	N/A	N/A	N/A	5	Compound	14.4662
1093711538	F	11	SN0029305592	AZ10245253	NR1I2	8856	5.6	5	Compound	14.4561
1093713822	L	2	SN1106572661	AZ13642981	MAOB	4129	6.35	5	Compound	14.4146
1093713860	I	7	SN1089190770	AZ10196856	TRHR	7201	8.52	5	Compound	14.4014
1093711521	I	16	SN1105932792	AZ13620452	SCN9A	6335	7.09	5	Compound	14.4006
1093711422	G	7	SN1034228747	AZ13438276	PIM1	5292	9.12	5	Compound	14.3888
1093711453	N	3	SN1001426874	AZ11187074	GMNN	51053	7.24	5	Compound	14.3745
1093711576	M	17	SN0067430619	AZ10308383	GPR120	338557	6.33	5	Compound	14.3712
1093713853	D	3	SN1055910467	AZ13848532	CDK9	1025	8.4	5	Compound	14.3635
1093713891	I	2	SN0039011929	AZ10232366	GMNN	51053	8.34	5	Compound	14.3606
1093711453	I	16	SN1109510370	AZ13715561	KCNH2	3757	3.61	5	Compound	14.3563
1093711682	O	5	SN0200122585	AZ11603379	CHUK	1147	7.3	5	Compound	14.3545
1093711675	H	7	SN1000994500	AZ11700335	PPARA	5465	8.4	5	Compound	14.3535
1093713778	L	21	SN1066059655	AZ12644464	NTRK1	4914	9.51	5	Compound	14.3415
1093711613	M	22	SN1122300813	AZ11157570	N/A	N/A	N/A	5	Compound	14.3273
1093711613	O	18	SN1045160898	AZ12172038	GSK3B	2932	5.52	5	Compound	14.32
1093711392	G	5	13358	N/A	N/A	N/A	N/A	5	Compound	14.3177
1093711682	O	13	SN1123052684	AZ13767828	HDAC6	10013	8.47	5	Compound	14.3174
1093711477	O	15	SN1017894064	AZ13225167	TLR9	54106	8.34	5	Compound	14.3132
1093711538	O	13	SN0151377284	AZ12065028	STAT6	6778	7.06	5	Compound	14.3101
1093713907	K	22	SN1014391461	AZ13135588	AR	367	9.6	5	Compound	14.3005
1093711422	H	10	SN1088341716	AZ10281394	HTR2A	3356	5.51	5	Compound	14.3002
1093711392	E	17							Neutral Control	14.2998
1093713891	F	5	SN1045005524	AZ13723778	JAK2	3717	8.65	5	Compound	14.296
1093711705	N	2	SN1123536871	AZ11761013	ADORA1	134	7.4	5	Compound	14.2741
1093713853	K	18	SN1049615632	AZ13757654	SETD7	80854	9.48	5	Compound	14.2725
1093711385	D	10	7661	N/A	N/A	N/A	N/A	5	Compound	14.2679
1093711637	N	4	SN1042391426	AZ12191595	CYP2C19	1557	6.57	5	Compound	14.267
1093711699	N	4	SN1123576729	AZ11133516	ADRA1D	146	10	5	Compound	14.2653
1093713839	C	10	SN1044801037	AZ10608056	GMNN	51053	7.69	5	Compound	14.2547
1093713914	M	8	SN1039072134	AZ11693396	GSK3B	2932	9.42	5	Compound	14.2546
1093713778	E	13	SN1020227483	AZ12096424	AURKA	6790	9	5	Compound	14.2507
1093711507	H	19	SN0151015031	AZ10534617	FAAH	2166	5.77	5	Compound	14.2395
1093711613	E	19	SN1140248768	AZ14106110	SHH	6469	8.3	5	Compound	14.2223
1093713839	I	4	SN1072452730	AZ12375759	ABCB1	5243	6.22	5	Compound	14.2188
1093713891	L	20	SN1037313102	AZ11763129	LIG1	3978	4.76	5	Compound	14.2108
1093711651	J	5	SN0054378432	AZ11716941	MLYCD	23417	7.07	5	Compound	14.2092
1093711415	C	22	SN0214199475	AZ10937040	SMAD3	4088	5.2	5	Compound	14.2089
1093711682	F	3	SN0174991727	AZ10624819	MAPK8	5599	7.3	5	Compound	14.2054
1093711750	J	18	SN1030745573	AZ13423950	FFAR2	2867	6.65	5	Compound	14.2052
1093711538	I	18	SN1017877408	AZ11193976	SRC	6714	5.49	5	Compound	14.1979
1093711699	I	8	SN1015383439	AZ12799734	TGFBR1	7046	8.12	5	Compound	14.1909
1093711675	J	5	SN0152121913	AZ10531666	PLA2G4A	5321	8.33	5	Compound	14.173
1093713891	E	14	SN0038803079	AZ10517612	PPARG	5468	7.3	5	Compound	14.1728
1093713808	F	4	SN0037038357	AZ10743793	GHSR	2693	6.14	5	Compound	14.1585
1093711422	K	13	SN0028596325	AZ10008017	THRB	7068	8.7	5	Compound	14.1578
1093713853	N	21	SN1007098626	AZ10150497	ADRB1	153	6.46	5	Compound	14.1502
1093711446	G	9	SN1065777543	AZ12646495	GLA	2717	7.3	5	Compound	14.1488
1093713815	B	10	11287	N/A	N/A	N/A	N/A	5	Compound	14.1372
1093711415	F	14	SN1064039039	AZ12488024	OPRD1	4985	9.9	5	Compound	14.1363
1093713839	K	16	SN1074844483	AZ12831905	IGF1R	3480	7.64	5	Compound	14.128
1093711712	M	2	2761	N/A	N/A	N/A	N/A	5	Compound	14.1187
1093711408	I	3	SN0020685684	AZ10427909	EDNRA	1909	6.5	5	Compound	14.1141
1093713860	J	7	SN1000490899	AZ13150059	CXCR2	3579	5.7	5	Compound	14.1095
1093711590	H	14	SN0027538091	AZ10234806	PIK3CG	5294	5.48	5	Compound	14.0851
1093711750	O	11	SN1107712088	AZ13674251	GRIN2C	2905	5.62	5	Compound	14.0748
1093711422	F	22	SN1114241798	AZ13725727	CCR6	1235	4.47	5	Compound	14.0645
1093711743	J	20	SN1106558398	AZ13642089	EGFR	1956	4.76	5	Compound	14.0631
1093711613	O	21	SN1123526430	AZ12133661	NR3C2	4306	9.29	5	Compound	14.0616
1093711606	N	14	SN1122314698	AZ13745173	GRM5	2915	8.1	5	Compound	14.0553
1093711422	K	2	SN1105487482	AZ13605129	ADORA3	140	7.55	5	Compound	14.0544
1093711439	B	6	SN1057013518	AZ13836083	PIK3CG	5294	8.05	5	Compound	14.0471
1093711514	O	8	SN0040080142	AZ10307507	GABBR1	2550	8.13	5	Compound	14.0448
1093711750	J	14	SN1105186625	AZ13595056	GPBAR1	151306	6.9	5	Compound	14.041
1093713860	O	15	SN0057180199	AZ11870981	SIRT1	23411	5.12	5	Compound	14.0393
1093711668	K	16	SN0152098898	AZ10560564	SLC9A1	6548	7.7	5	Compound	14.0274
1093711408	B	13	SN1108219436	AZ12552790	COMT	1312	9.57	5	Compound	14.0239
1093711569	N	4	SN1094657957	AZ13284873	HTR2A	3356	7.82	5	Compound	14.0214
1093711644	H	8	SN1082955769	AZ13002202	BACE1	23621	9.13	5	Compound	14.0176
1093713907	E	10	SN0069140824	AZ12320868	ADRA2B	151	4.02	5	Compound	14.0165
1093713877	K	7	SN1122310985	AZ13745130	HTR3A	3359	9.82	5	Compound	14.0152
1093713822	M	9	12074	N/A	N/A	N/A	N/A	5	Compound	14.0119
1093711415	B	15	SN1123572582	AZ12064823	P2RY12	64805	8.42	5	Compound	14.0018
1093711484	O	13	SN1059017445	AZ12527175	TSG101	7251	8.48	5	Compound	13.9951
1093711644	O	21	SN0165366871	AZ11700587	CXCR2	3579	8.7	5	Compound	13.9932
1093713891	B	2							Neutral Control	13.9927
1093713860	E	15	SN1019317283	AZ13279973	GPR119	139760	7.74	5	Compound	13.9774
1093711521	N	16	SN1041336136	AZ11945671	CHRNA4	1137	7.41	5	Compound	13.9702
1093713839	I	5	SN1000495655	AZ13241785	CXCL1	2919	8.62	5	Compound	13.9261
1093711491	D	14	SN0024075332	AZ10144108	AGTR1	185	8.83	5	Compound	13.9257
1093713853	B	13	SN1122301077	AZ13745006	N/A	N/A	N/A	5	Compound	13.9175
1093711682	H	4							Neutral Control	13.9074
1093713778	M	5	SN1068079096	AZ12632276	NR3C2	4306	7.72	5	Compound	13.895
1093711750	O	7	SN1061253521	AZ12557749	MAPK14	1432	7.69	5	Compound	13.8921
1093711606	K	17	SN1059452314	AZ12535709	EIF2AK3	9451	5.82	5	Compound	13.8899
1093713815	N	22	11543	N/A	N/A	N/A	N/A	5	Compound	13.8868
1093711705	B	8	SN0020531875	AZ10215897	GRIN2C	2905	6.94	5	Compound	13.874
1093711439	F	18	SN1043419172	AZ12233310	AXL	558	8.17	5	Compound	13.8731
1093713815	F	8	11365	N/A	N/A	N/A	N/A	5	Compound	13.8598
1093711422	O	8	SN0044528255	AZ10356995	HDAC1	3065	6.62	5	Compound	13.8497
1093711453	D	18	SN1049236205	AZ13754984	GPR81	27198	4.45	5	Compound	13.8342
1093711606	O	5	SN1092443141	AZ12063104	OPRK1	4986	9.65	5	Compound	13.828
1093711415	D	8	SN0039923304	AZ12168871	ADRA2A	150	5.73	5	Compound	13.8258
1093713891	J	12	SN0215923603	AZ11603543	HSP90AA1	3320	6.05	5	Compound	13.8166
1093713808	G	8	SN1059356831	AZ13927472	GSK3A	2931	8.53	5	Compound	13.8138
1093711507	D	22	SN1108782712	AZ13699753	BRD4	23476	4.7	5	Compound	13.7929
1093713907	E	11	SN1051558480	AZ13775427	PIM1	5292	9.54	5	Compound	13.7835
1093713778	L	7							Neutral Control	13.7834
1093713846	C	23	SN1123525241	AZ12133196	EPAS1	2034	7.44	5	Compound	13.7731
1093711712	O	13	SN1033640540	AZ11091053	CCKBR	887	8.07	5	Compound	13.7655
1093713822	C	2	SN1078293640	AZ12902249	CCND2	894	6.7	5	Compound	13.7632
1093711392	N	3	13500	N/A	N/A	N/A	N/A	5	Compound	13.7625
1093711750	O	13	SN1101484830	AZ10225677	N/A	N/A	N/A	5	Compound	13.7621
1093713846	E	10	SN0049872263	AZ10196251	CYP2C19	1557	6.3	5	Compound	13.7605
1093711484	K	22	SN0151418152	AZ10537991	GALC	2581	6.15	5	Compound	13.7475
1093713877	C	23	SN0010595183	AZ10007141	VDR	7421	7.9	5	Compound	13.7416
1093711590	I	3	SN0190458097	AZ11805774	CCR3	1232	6.7	5	Compound	13.7291
1093711668	I	17	SN1061387896	AZ12456623	NTRK1	4914	9.87	5	Compound	13.7254
1093713891	G	3	SN1123523533	AZ11961597	PTGER1	5731	7.25	5	Compound	13.7244
1093713914	D	6	SN0190452011	AZ11695319	CCR4	1233	8.24	5	Compound	13.7181
1093711538	D	8	SN1054526408	AZ13812484	RARG	5916	7.94	5	Compound	13.7106
1093711613	N	14	SN0208778756	AZ11917461	FOXA2	3170	5.89	5	Compound	13.6971
1093711392	L	17							Neutral Control	13.6911
1093713839	G	11	SN1067530470	AZ12660346	PRKCI	5584	3.62	5	Compound	13.6776
1093713860	B	19	SN1009034351	AZ12861151	MTOR	2475	8.38	5	Compound	13.6766
1093713884	M	12	SN0011127145	AZ10000247	PIK3CG	5294	9.84	5	Compound	13.6647
1093711569	E	13	SN1046322387	AZ12291295	HSD11B2	3291	6.44	5	Compound	13.649
1093713877	J	17	SN1105121709	AZ13592697	KCNH2	3757	3.6	5	Compound	13.6424
1093711675	M	23	SN1109347323	AZ13706372	TBK1	29110	7.72	5	Compound	13.6354
1093711460	M	20	SN1140237808	AZ11920108	PRKCG	5582	8.22	5	Compound	13.6321
1093713822	K	22	SN1073404628	AZ12753221	GABRA1	2554	8.72	5	Compound	13.6259
1093713860	G	8	SN0032531938	AZ10036653	GRIN1	2902	6.2	5	Compound	13.6234
1093711668	N	23	SN0071998538	AZ10321689	CYP1B1	1545	8.52	5	Compound	13.6223
1093711743	K	9	SN1083343278	AZ12012395	KDM4A	9682	8.46	5	Compound	13.617
1093711484	H	11	SN1046453211	AZ13756547	CXCR4	7852	9	5	Compound	13.6035
1093711460	H	8	SN1105187932	AZ13595093	MEN1	4221	5	5	Compound	13.603
1093713884	O	11	SN0027398219	AZ10380304	CCKBR	887	8.52	5	Compound	13.6022
1093711590	N	11	SN1107817622	AZ13677007	BRD3	8019	6	5	Compound	13.5881
1093711651	N	21	SN1017193996	AZ10835164	GRIN2A	2903	6.02	5	Compound	13.5869
1093711545	L	11	SN1077002168	AZ10053454	EGFR	1956	7.04	5	Compound	13.5816
1093713839	D	11	SN0152837304	AZ12064844	N/A	N/A	N/A	5	Compound	13.5766
1093711712	F	14	SN1151660389	AZ10777202	MAPK10	5602	6.4	5	Compound	13.5658
1093711477	J	23	SN1123536517	AZ13783738	CDK2	1017	5.55	5	Compound	13.5598
1093711569	F	14	SN1123529086	AZ13783902	NFE2L2	4780	7.79	5	Compound	13.5567
1093713860	B	4	SN0157168994	AZ10628956	MAPK8	5599	6.65	5	Compound	13.5523
1093711699	G	11	SN1082482146	AZ12992289	RET	5979	8.77	5	Compound	13.5454
1093711743	L	19	SN1037477254	AZ13565978	RARA	5914	5.6	5	Compound	13.5444
1093713877	H	2	SN1027793567	AZ11355755	CHRM4	1132	6.78	5	Compound	13.5417
1093713778	D	18	SN1060791688	AZ12559895	GCK	2645	6.62	5	Compound	13.5414
1093711668	L	17							Neutral Control	13.5392
1093711477	H	4							Neutral Control	13.539
1093711675	O	20	SN0116540004	AZ10016105	MPO	4353	6.7	5	Compound	13.527
1093713815	E	9	11346	N/A	N/A	N/A	N/A	5	Compound	13.5196
1093711484	B	10	SN1092251375	AZ13205136	PIK3CB	5291	7.94	5	Compound	13.5108
1093711699	M	5	SN0039029886	AZ10233872	ACHE	43	5.89	5	Compound	13.5064
1093711415	I	6	SN1123535446	AZ13783715	ADORA2B	136	4.63	5	Compound	13.505
1093711545	K	20	SN0040279570	AZ10324235	GABRB3	2562	7.84	5	Compound	13.4879
1093713808	N	7	8146	N/A	N/A	N/A	N/A	5	Compound	13.4778
1093711569	I	2	SN1044802476	AZ10083857	CA2	760	8.46	5	Compound	13.4775
1093711385	H	7	7740	N/A	N/A	N/A	N/A	5	Compound	13.4759
1093713839	I	10	SN1013617357	AZ11130647	HTR1A	3350	8.94	5	Compound	13.4665
1093711385	E	15	7686	N/A	N/A	N/A	N/A	5	Compound	13.4631
1093713808	L	9	8106	N/A	N/A	N/A	N/A	5	Compound	13.4615
1093713877	D	11	SN1082753265	AZ12997655	CHRM1	1128	7.63	5	Compound	13.4592
1093711613	O	11	SN1013698036	AZ10616590	HTR1B	3351	9.3	5	Compound	13.4513
1093713860	F	6	SN1065402867	AZ12618466	ATM	472	9.1	5	Compound	13.4491
1093711637	J	16	SN1044792318	AZ12266394	NR3C1	2908	8.2	5	Compound	13.4455
1093711484	L	6	SN1029041294	AZ13401984	DGAT1	8694	7.5	5	Compound	13.4325
1093713815	B	5	11282	N/A	N/A	N/A	N/A	5	Compound	13.4265
1093711521	E	19	SN1105187413	AZ13595068	DRD4	1815	8.42	5	Compound	13.4245
1093711491	C	17	SN1039257823	AZ11931348	ESR2	2100	9.43	5	Compound	13.4171
1093711590	O	15	SN0150658746	AZ11696067	FFAR1	2864	6.18	5	Compound	13.4163
1093713860	O	21	SN1078209828	AZ12129682	MBNL1	4154	5.05	5	Compound	13.4105
1093711477	K	5	SN1049538632	AZ12351771	ITK	3702	8.44	5	Compound	13.4061
1093711569	L	6	SN1101775156	AZ11874616	RET	5979	5.96	5	Compound	13.3963
1093711729	B	18	SN1123525373	AZ13783583	AR	367	9.6	5	Compound	13.3935
1093711385	F	16	7707	N/A	N/A	N/A	N/A	5	Compound	13.3809
1093713877	C	2	SN0212321543	AZ12021209	TLR4	7099	5.95	5	Compound	13.3748
1093711606	K	22	SN1031299507	AZ13415281	KDR	3791	5.88	5	Compound	13.3673
1093711484	I	3	SN1122325276	AZ10423766	CA2	760	6.98	5	Compound	13.3575
1093711668	C	7	SN1140252868	AZ14106194	CHRNA4	1137	7.4	5	Compound	13.3574
1093711712	M	12	2771	N/A	N/A	N/A	N/A	5	Compound	13.3536
1093711477	H	7	SN1140241224	AZ12634101	ACE	1636	8.82	5	Compound	13.3443
1093711446	I	2	SN0010021735	AZ10000165	TRPV4	59341	4.91	5	Compound	13.3359
1093711439	N	5	SN0183679613	AZ10414317	CRHR2	1395	6.01	5	Compound	13.3316
1093711491	K	13	SN1055702786	AZ12465398	GSK3B	2932	7.25	5	Compound	13.3312
1093713907	C	19	SN1065197320	AZ12596586	P2RX3	5024	8.61	5	Compound	13.3182
1093713846	N	2	SN0025758573	AZ10365870	USP7	7874	4.04	5	Compound	13.3165
1093711545	M	3	SN0150350043	AZ10246742	NOS1	4842	6.86	5	Compound	13.3163
1093713808	M	10	SN1080650116	AZ12941576	NTRK1	4914	8.3	5	Compound	13.3096
1093713891	K	7	SN0210908529	AZ11988177	ROCK1	6093	8.5	5	Compound	13.3037
1093711668	D	2	SN1075979263	AZ12729274	MTOR	2475	8.15	5	Compound	13.3031
1093713907	M	7	SN1016136720	AZ10147710	ADRA2A	150	8.38	5	Compound	13.2974
1093711712	M	23	SN1052844270	AZ12412874	N/A	N/A	N/A	5	Compound	13.2953
1093711538	B	8	SN1107819330	AZ13677027	BRD3	8019	6.7	5	Compound	13.2914
1093711637	J	2	SN1107711272	AZ13674234	N/A	N/A	N/A	5	Compound	13.2762
1093713860	O	10	SN1058055286	AZ13849249	PRKAA2	5563	8.66	5	Compound	13.2634
1093713884	F	9	SN1057545012	AZ12499283	TRPA1	8989	6.13	5	Compound	13.2599
1093713860	K	14	SN1140253269	AZ14106225	CYP11B2	1585	10	5	Compound	13.2598
1093711668	O	4	SN1076923617	AZ12823059	MAPK14	1432	9.7	5	Compound	13.2594
1093711637	L	22	SN1055269546	AZ13814941	IRAK4	51135	8.89	5	Compound	13.2574
1093711477	K	14	SN1054678324	AZ12445947	LIG1	3978	6.33	5	Compound	13.2564
1093713891	D	14	SN1035488235	AZ13552849	EGFR	1956	8.83	5	Compound	13.2516
1093711705	O	21	SN0152664033	AZ10555198	BRAF	673	5.01	5	Compound	13.251
1093711422	F	14	SN0029632540	AZ10399480	PTGER1	5731	5.8	5	Compound	13.2437
1093711651	J	16	SN0125145899	AZ10434903	CSK	1445	8.92	5	Compound	13.2327
1093713877	N	21	SN1060337895	AZ12453646	CCR8	1237	5.7	5	Compound	13.2321
1093711644	C	18	SN1105854387	AZ12014282	CYP2D6	1565	8.13	5	Compound	13.2272
1093711415	L	23	SN1140248098	AZ14106104	GSK3B	2932	7.28	5	Compound	13.2214
1093713815	O	14	11555	N/A	N/A	N/A	N/A	5	Compound	13.2148
1093711521	N	12							Neutral Control	13.2128
1093711569	O	8	SN0044628245	AZ10363836	SLC10A1	6554	6.59	5	Compound	13.2096
1093711477	E	4	SN1040047396	AZ12123730	TP53	7157	9.1	5	Compound	13.2089
1093711668	N	16	SN1079534364	AZ12929345	CNR1	1268	6.7	5	Compound	13.1998
1093711385	J	7	7780	N/A	N/A	N/A	N/A	5	Compound	13.1988
1093711552	O	10	SN0067453200	AZ10310173	CYP2C19	1557	7	5	Compound	13.192
1093711743	D	9	SN1090320945	AZ11699119	CHRM4	1132	5.6	5	Compound	13.1873
1093711484	F	3	SN1059418463	AZ13925333	HDAC6	10013	8.86	5	Compound	13.1872
1093713891	B	21	SN1021674679	AZ13258977	ALPI	248	8.47	5	Compound	13.1688
1093711613	M	21	SN1090322667	AZ13155913	TSHR	7253	6	5	Compound	13.1606
1093711552	C	14	SN0211431843	AZ11664579	HSD11B1	3290	6.6	5	Compound	13.1588
1093711514	F	4	SN0150330109	AZ10525355	NR3C1	2908	5.17	5	Compound	13.1555
1093711422	I	20	SN1135045571	AZ12134427	MC1R	4157	9.96	5	Compound	13.1539
1093711651	O	20	SN1017613674	AZ13112694	PTGS2	5743	8.48	5	Compound	13.1534
1093713778	B	14	SN1084416530	AZ13020373	CYP19A1	1588	8.4	5	Compound	13.1517
1093711675	B	9	SN1056414470	AZ13836118	RARG	5916	7.81	5	Compound	13.1505
1093711712	J	15	SN1070938268	AZ12751326	CASP3	836	5.06646	5	Compound	13.1351
1093713914	H	9	SN1090139908	AZ10002310	DHFR	1719	9.62	5	Compound	13.1329
1093711675	O	4	SN1062423356	AZ11929034	F2	2147	6.96	5	Compound	13.1083
1093711682	L	22	SN1110333177	AZ13719497	KCNH2	3757	2.75	5	Compound	13.1064
1093711422	D	4	SN0150338677	AZ10527229	DRD1	1812	6.77	5	Compound	13.0813
1093711491	O	15	SN1064086470	AZ12616842	CHRM1	1128	7.35	5	Compound	13.0753
1093711446	N	15	SN0010830742	AZ10010111	EED	8726	5.79	5	Compound	13.07
1093711392	O	21	13536	N/A	N/A	N/A	N/A	5	Compound	13.0698
1093713891	D	19	SN1074844351	AZ12831903	IGF1R	3480	7.37	5	Compound	13.0673
1093711750	D	8	SN0067554926	AZ10316368	AHR	196	6.78	5	Compound	13.0634
1093711682	D	19	SN1038246181	AZ13599056	PIK3CA	5290	9.21	5	Compound	13.0587
1093713853	J	22	SN1033123219	AZ13466444	ESR1	2099	9.59	5	Compound	13.0557
1093711705	B	17	SN1001622471	AZ13206789	PRKDC	5591	8.58	5	Compound	13.0535
1093711699	K	7	SN1034368784	AZ13475971	ARAF	369	8.68	5	Compound	13.0431
1093711477	D	14	SN1054507681	AZ12442984	CA9	768	8.3	5	Compound	13.038
1093711446	J	14	SN1002952573	AZ10882508	FABP1	2168	9.57	5	Compound	13.0357
1093713846	N	23	SN1089294072	AZ13127439	NR3C2	4306	6.18	5	Compound	13.0203
1093713822	M	2	SN0150410340	AZ10168379	GABRA2	2555	5.77	5	Compound	13.0189
1093711712	J	18	SN1081540052	AZ12971684	NAMPT	10135	9	5	Compound	13.0165
1093713808	H	15	8028	N/A	N/A	N/A	N/A	5	Compound	13.0114
1093711606	J	12	SN0036963071	AZ10142290	BLM	641	8.55	5	Compound	13.0108
1093711651	J	17	SN1066991544	AZ12671089	ITGAV	3685	9.82	5	Compound	13.0084
1093713778	E	22	SN0135705881	AZ10329423	GSK3A	2931	7	5	Compound	12.9958
1093711668	D	15	SN1151665400	AZ14132131	N/A	N/A	N/A	5	Compound	12.9949
1093711408	I	2	SN1123572983	AZ13785310	HRH2	3274	8.24	5	Compound	12.9882
1093713822	N	9	12096	N/A	N/A	N/A	N/A	5	Compound	12.9797
1093713877	H	6	SN1123530530	AZ13783633	METAP2	10988	6	5	Compound	12.9754
1093711613	B	9	SN1016534586	AZ13219701	PTRH2	51651	6	5	Compound	12.9746
1093711750	I	6	SN1151683399	AZ13298332	GUCY1A1	2982	6.52	5	Compound	12.9741
1093711668	M	12	SN1027684575	AZ11354169	CHRM1	1128	7.36	5	Compound	12.9737
1093713846	I	23	SN0176970154	AZ11790410	CTSK	1513	5.85	5	Compound	12.9716
1093711606	I	15	SN1121648375	AZ13729570	ROCK2	9475	8.64	5	Compound	12.9674
1093711712	M	22	SN0028950779	AZ10039742	SLC6A2	6530	5.36	5	Compound	12.9665
1093711453	J	10	SN1041400152	AZ13656976	CYP2C8	1558	5.69	5	Compound	12.963
1093711743	G	14	SN1016284340	AZ13303261	FFAR1	2864	7.49	5	Compound	12.9614
1093711545	F	11	SN1044368821	AZ10537392	BLM	641	8.8	5	Compound	12.9587
1093713778	C	20	SN0210546257	AZ12032500	RCE1	9986	5.12	5	Compound	12.9509
1093713860	K	12	SN1045570497	AZ12278420	HTR6	3362	9.17	5	Compound	12.9442
1093711415	N	22	SN1003959196	AZ11965173	ESR1	2099	8.82	5	Compound	12.9335
1093711415	B	9	SN0027243188	AZ10286967	ATM	472	6.12	5	Compound	12.9334
1093713884	O	19	SN1052624191	AZ12368784	MPO	4353	7.04	5	Compound	12.93
1093713822	H	7	11970	N/A	N/A	N/A	N/A	5	Compound	12.9264
1093711668	O	9	SN1027656164	AZ13395602	EGFR	1956	8.14	5	Compound	12.9237
1093713884	I	21	SN1050662329	AZ12372721	HTR1B	3351	6.8	5	Compound	12.911
1093711705	M	10	SN1102449802	AZ12443088	GSK3B	2932	8.15	5	Compound	12.9028
1093711460	L	16	SN0150283490	AZ10522712	EXT1	2131	4.18	5	Compound	12.8936
1093711613	O	7	SN0150356403	AZ10525986	NR3C2	4306	6.5	5	Compound	12.8886
1093711637	M	8	SN1024711326	AZ13295355	PLA2G2D	26279	7.92	5	Compound	12.8869
1093711637	K	7	SN0120858460	AZ10152133	NPY5R	4889	7.07	5	Compound	12.8845
1093711521	G	6	SN1026187424	AZ11329880	HTT	3064	6.35	5	Compound	12.8767
1093711699	O	22							Neutral Control	12.8736
1093713860	E	3	SN1029704299	AZ11938260	PRKCI	5584	3	5	Compound	12.8732
1093711705	O	14	SN1071203702	AZ12752169	CHRNA4	1137	8.3	5	Compound	12.8712
1093713822	F	9	11930	N/A	N/A	N/A	N/A	5	Compound	12.8582
1093711477	M	3	SN1123535965	AZ13783727	SCD	6319	7.92	5	Compound	12.856
1093711439	B	13	SN1077291263	AZ12881429	MAPK1	5594	8.26	5	Compound	12.8514
1093711415	B	16	SN1076295128	AZ12862393	GRM2	2912	6.29	5	Compound	12.8415
1093711606	L	14	SN1107645686	AZ13672157	RXRA	6256	4.88	5	Compound	12.8365
1093713914	H	8	SN1074283972	AZ12728899	HTR1A	3350	9.22	5	Compound	12.8337
1093711569	B	21	SN1029961298	AZ13410357	NOS2	4843	6.74	5	Compound	12.8195
1093711569	N	8	SN1101744215	AZ13329414	CACNA1C	775	5.74	5	Compound	12.8146
1093713846	E	7							Neutral Control	12.8088
1093713815	O	8	11549	N/A	N/A	N/A	N/A	5	Compound	12.8064
1093711514	H	9	SN0016070792	AZ10039690	BRAF	673	6.53	5	Compound	12.8031
1093713891	O	10	SN0150542625	AZ10532816	GPR35	2859	8.4	5	Compound	12.8006
1093713891	I	21	SN1048035805	AZ10407311	CYP1A2	1544	6.64	5	Compound	12.795
1093711484	C	3	SN1023468199	AZ10574190	IRAK4	51135	3.61	5	Compound	12.7928
1093713884	K	23	SN0179090760	AZ12277042	GABRA1	2554	8.96	5	Compound	12.7856
1093711507	D	9	SN0027030526	AZ10037686	CYP11B2	1585	8.22	5	Compound	12.7726
1093711729	N	12							Neutral Control	12.7702
1093713877	O	11	SN0188235633	AZ11570283	NOS2	4843	5.44	5	Compound	12.7609
1093711576	N	16	SN1036489319	AZ13480219	NOX1	27035	6.8	5	Compound	12.7552
1093711422	H	6	SN1086956034	AZ12494399	NOS1	4842	5.62	5	Compound	12.755
1093713914	M	4	SN1082046508	AZ10210575	CYP3A4	1576	7.24	5	Compound	12.7461
1093711477	B	8	SN1049734111	AZ11765674	ACVRL1	94	8.72	5	Compound	12.7251
1093711415	D	4	SN1033012320	AZ10094563	N/A	N/A	N/A	5	Compound	12.716
1093711460	J	8	SN1003802594	AZ10908525	BLM	641	7.05	5	Compound	12.709
1093711415	N	3	SN1026404060	AZ13208479	HTR1A	3350	6.11	5	Compound	12.7013
1093713822	G	16	11959	N/A	N/A	N/A	N/A	5	Compound	12.6993
1093711538	B	18	SN1043624606	AZ12382280	MC5R	4161	4.37	5	Compound	12.6962
1093711453	G	7	SN0151941513	AZ10539419	CXCR1	3577	6.82	5	Compound	12.6889
1093711613	N	15	SN0055193393	AZ10218880	TERT	7015	6.77	5	Compound	12.6784
1093711682	E	4	SN1071170647	AZ12728203	CHRM5	1133	10.05	5	Compound	12.6751
1093711453	N	17	SN0040048413	AZ12169001	THRA	7067	9.62	5	Compound	12.6744
1093711477	E	3	SN1107819759	AZ13677035	SPR	6697	8.51	5	Compound	12.6738
1093711750	K	20	SN1075598751	AZ12848313	HRH3	11255	8.2	5	Compound	12.6615
1093711606	K	6	SN1105902417	AZ13619646	LCK	3932	9	5	Compound	12.6607
1093711576	D	22	SN1032286522	AZ13495844	PFKFB3	5209	7.03	5	Compound	12.6594
1093711613	M	19	SN0039597677	AZ10421408	ADAM9	8754	6.09	5	Compound	12.6553
1093711415	H	9	SN0050454477	AZ10200576	ATM	472	6.6	5	Compound	12.6507
1093711743	B	13	SN1015282378	AZ13146892	CSNK2A1	1457	7.39	5	Compound	12.6448
1093711385	D	9	7660	N/A	N/A	N/A	N/A	5	Compound	12.6426
1093711514	D	14	SN1088624597	AZ13105973	PRKCH	5583	6.4	5	Compound	12.6394
1093713808	G	6	SN1054406154	AZ13805790	MINK1	50488	5.71	5	Compound	12.6369
1093713815	C	12							Neutral Control	12.6358
1093713914	O	18	SN1073281732	AZ12797915	SCN9A	6335	6.56	5	Compound	12.6302
1093711415	I	20	SN0023949449	AZ11892354	CYP2C19	1557	6.29	5	Compound	12.6257
1093713860	N	7	SN1062915488	AZ12522367	GCK	2645	7.32	5	Compound	12.6242
1093713877	O	16	SN1017544630	AZ13121492	PRKDC	5591	4.29	5	Compound	12.6161
1093711637	O	21	SN0180654747	AZ10330938	SRC	6714	8.75	5	Compound	12.611
1093713877	B	6	SN0190266973	AZ11700518	CXCR2	3579	8.3	5	Compound	12.608
1093711385	I	4	SN0020752072	AZ12027158	AHR	196	8.11	5	Compound	12.6039
1093711507	J	8	SN0209783657	AZ11949735	GRM5	2915	4.12	5	Compound	12.5889
1093713860	D	18	SN1121647842	AZ13729461	BACE1	23621	9.11	5	Compound	12.5851
1093711620	L	3	SN1017206329	AZ10904426	GRIN1	2902	6.77	5	Compound	12.5834
1093711637	K	13	SN1071132011	AZ11930199	F2	2147	5.52	5	Compound	12.578
1093711446	E	9	SN1040087627	AZ12204377	KIF11	3832	8.49	5	Compound	12.5702
1093711682	H	18	SN1123522759	AZ12632234	DRD1	1812	6	5	Compound	12.5632
1093711712	E	15	SN0150774749	AZ10276690	DRD1	1812	10	5	Compound	12.5628
1093711507	L	14	SN1057813885	AZ12504163	SLC6A2	6530	5.31	5	Compound	12.5624
1093711682	E	16	SN1073442033	AZ11603877	MAPK1	5594	4.65	5	Compound	12.5599
1093713884	O	22							Neutral Control	12.5578
1093711750	K	17	SN0154133810	AZ11642528	SLC16A1	6566	9.46	5	Compound	12.5553
1093711514	F	6	SN0018328604	AZ10119893	ADRB1	153	5.6	5	Compound	12.5467
1093711422	J	9	SN1056250615	AZ10962911	CYP2C19	1557	6	5	Compound	12.5432
1093713822	F	11	11932	N/A	N/A	N/A	N/A	5	Compound	12.5342
1093711538	C	19	SN1057818924	AZ12504214	EHMT2	10919	10	5	Compound	12.5336
1093711637	I	10	SN1081124513	AZ12962947	MAPK14	1432	8.89	5	Compound	12.5317
1093713839	L	11	SN1016717128	AZ13134298	ALPI	248	8.51	5	Compound	12.5281
1093711415	L	15	SN1019169164	AZ13270255	HRH4	59340	7.15	5	Compound	12.525
1093711705	D	8	SN1075824666	AZ12852932	LIG1	3978	6.47	5	Compound	12.5226
1093713822	H	14	SN0183409650	AZ10411010	KPNB1	3837	4.2	5	Compound	12.5187
1093711521	H	14	SN1008922613	AZ13219886	GCK	2645	7.72	5	Compound	12.5073
1093711675	F	17	SN1030228420	AZ11144719	WRN	7486	4.53	5	Compound	12.5038
1093711682	N	16	SN1062217304	AZ12584558	PDGFRB	5159	6	5	Compound	12.5003
1093711729	H	8	SN1057192031	AZ13836413	SYK	6850	9.89	5	Compound	12.4935
1093711491	B	5	SN0151338011	AZ10544910	GMNN	51053	8.19	5	Compound	12.4919
1093711651	O	21	SN1057822623	AZ12504261	OPRL1	4987	6	5	Compound	12.4913
1093711385	O	4	7879	N/A	N/A	N/A	N/A	5	Compound	12.4862
1093713860	L	7							Neutral Control	12.4837
1093711576	I	21	SN1016534454	AZ13219696	PTRH2	51651	6	5	Compound	12.481
1093711408	G	18	SN1123539145	AZ13783784	HTR6	3362	7.7	5	Compound	12.4733
1093713778	D	6	SN0199166870	AZ10444246	CNR1	1268	5.6	5	Compound	12.4724
1093711699	L	9	SN1029663607	AZ13370966	MET	4233	5.46	5	Compound	12.4688
1093711576	N	12							Neutral Control	12.4678
1093713822	M	15	12080	N/A	N/A	N/A	N/A	5	Compound	12.4651
1093711477	I	10	SN1033245403	AZ13520982	AKT3	10000	8.45	5	Compound	12.4635
1093711637	B	10	SN1065523357	AZ12642102	ATXN2	6311	6.67	5	Compound	12.4574
1093711460	F	8	SN1065803195	AZ12646924	SCN3A	6328	8.02	5	Compound	12.4545
1093713884	N	15	SN1001346208	AZ10426703	N/A	N/A	N/A	5	Compound	12.449
1093711415	E	4	SN0215413462	AZ10415252	TRPV4	59341	6.11	5	Compound	12.4442
1093711668	L	13	SN0150777259	AZ10524868	SLC6A2	6530	7.72	5	Compound	12.4263
1093713884	O	2							Neutral Control	12.4231
1093711491	I	16	SN1048711753	AZ12300176	MC5R	4161	6.49	5	Compound	12.423
1093711569	C	17	SN0215331108	AZ11703611	CXCR2	3579	8.55	5	Compound	12.4153
1093711682	J	14	SN1095246083	AZ13303478	SCN9A	6335	5	5	Compound	12.3986
1093711750	O	20	SN1069067866	AZ10300602	PDE5A	8654	4.24	5	Compound	12.3917
1093711538	L	2	SN1102219381	AZ13502741	PIK3CD	5293	6.62	5	Compound	12.3907
1093711484	L	11	SN1135065448	AZ14027835	CTNNB1	1499	7.39	5	Compound	12.3891
1093713839	O	14	SN1092443792	AZ12373546	OPRD1	4985	9.98	5	Compound	12.3862
1093713877	O	21	SN0135720738	AZ10056539	SLC6A2	6530	5.35	5	Compound	12.3853
1093711699	M	15	SN1140243201	AZ14106019	VHL	7428	6.29	5	Compound	12.3785
1093713884	M	5	SN1044710975	AZ13664492	ESR1	2099	9.69	5	Compound	12.3781
1093711712	O	17	SN1040714408	AZ11938126	MAOA	4128	4.7	5	Compound	12.3774
1093713839	O	15	SN1041566642	AZ11881041	PYGB	5834	7.4	5	Compound	12.3575
1093711637	C	23	SN1097199674	AZ13358961	ESR1	2099	5.24	5	Compound	12.3474
1093713860	G	23	SN0010274062	AZ10003352	SLCO1B1	10599	5.6	5	Compound	12.3406
1093713914	O	6	SN0017180722	AZ11698923	CBX1	10951	7	5	Compound	12.3282
1093711552	C	4	SN1080142872	AZ12942065	PSEN1	5663	6.37	5	Compound	12.3247
1093711446	M	13	SN0215412410	AZ11334667	DHODH	1723	4.85	5	Compound	12.3197
1093713808	N	2	8141	N/A	N/A	N/A	N/A	5	Compound	12.3167
1093711750	M	4	SN1029777448	AZ10161092	BLM	641	9.3	5	Compound	12.3154
1093711408	K	14	SN1123538343	AZ13783931	KCNH2	3757	3.93	5	Compound	12.3121
1093711576	B	21	SN1022105428	AZ10183458	NGF	4803	5.71	5	Compound	12.3078
1093711415	O	9	SN1077513866	AZ12632270	SLC6A2	6530	8.72	5	Compound	12.3077
1093711545	L	5	SN1077291532	AZ12732526	MTOR	2475	9.35	5	Compound	12.3034
1093713907	K	19	SN1056548076	AZ13852372	DRD3	1814	6.45	5	Compound	12.2901
1093713815	O	4	11545	N/A	N/A	N/A	N/A	5	Compound	12.2889
1093711545	D	15	SN1001526878	AZ13318048	MAPK1	5594	6.32	5	Compound	12.2876
1093711705	N	3	SN0124493348	AZ12106722	GMNN	51053	6.34	5	Compound	12.2863
1093713907	J	4	SN1036969255	AZ13570553	LIPE	3991	8.4	5	Compound	12.284
1093711750	M	15	SN1094656084	AZ13284833	ADORA1	134	9.19	5	Compound	12.2786
1093711651	K	20	SN1043695509	AZ12245029	PTGDR	5729	9	5	Compound	12.2711
1093711637	O	6	SN0153391573	AZ12013537	CYP2D6	1565	7.5	5	Compound	12.27
[truncated: 13,406 more rows]
