# Supplementary material for: Nuclear fascin regulates cancer cell survival
Source: eLife. 2022 Aug 30;11:e79283. doi: 10.7554/eLife.79283 (PMC9427113; doi:10.7554/eLife.79283)
Supplement: Figure 7—source data 1. [file elife-79283-fig7-data1.xlsx]

## Sheet: Apoptosis AUC
Compound Info				mScarlet-fascin/fascin KD (WT)		mScarlet/fascin KD (KD)		Difference (WT - KD)
Compound ID	Sample Name	Synonym	MoA	Curve	qAC50 [M]	Curve	qAC50 [M]	Difference [M]	% Difference
SN1047164129	AZ13723372-001	SCHEMBL16209458	IRAK4 inhibitor		8.26214e-07		2.64323e-06	-1.81701e-06	-219.92
SN1036121508	AZ13508033-001	GSK923295	centromere associated protein inhibitor		3.53207e-08		6.65063e-08	-3.11856e-08	-88.2928
SN1053219913	AZ12420121-001	SCHEMBL12861893	GSK3 inhibitor		4.71428e-07		7.07065e-07	-2.35637e-07	-49.9837
SN0188025193	AZ11568140-001	CHEMBL115933 (Compound 34)	CDK2 inhibitor		2.06879e-07		2.87055e-07	-8.01763e-08	-38.7551
SN1151669528	AZ14132192-001	CHR-6494	haspin inhibitor		4.8642e-07		6.39982e-07	-1.53563e-07	-31.57
SN0154359961	AZ10554701-002	Bisindolylmaleimide-IX	PKC inhibitor		7.51333e-07		9.70605e-07	-2.19272e-07	-29.1843
SN1062996041	AZ14119711-001	PF-06263276	pan-JAK inhibitor		7.93101e-07		1.00447e-06	-2.11365e-07	-26.6505
SN1122677980	AZ11341640-003	5-Iodotubercidin	adenosine kinase inhibitor		2.23021e-06		2.60309e-06	-3.7288e-07	-16.7195
SN1057353095	AZ12496669-001	Digoxigenin	steroid		1.44429e-06		1.61646e-06	-1.72165e-07	-11.9204
SN1048163792	AZ12278487-007	SCHEMBL3548645	CDK inhibitor		5.20219e-07		5.73629e-07	-5.34098e-08	-10.2668
SN1048276267	AZ13737674-001	SR-3029	CK1D/CK1E inhibitor		2.52514e-07		2.76972e-07	-2.44575e-08	-9.68561
SN1054380477	AZ10352596-007	Cerivastatin	HMGCR inhibitor		1.45216e-06		1.55751e-06	-1.05347e-07	-7.2545
SN1055632718	AZ12464316-001	SCHEMBL3540056	CDK inhibitor		3.9774e-07		4.208e-07	-2.30605e-08	-5.79789
SN1059632852	AZ13927174-001	SCHEMBL16702398	GSK3 inhibitor		1.46836e-08		1.53476e-08	-6.64034e-10	-4.52229
SN1057031606	AZ12444557-005	SCHEMBL2485537	TRK inhibitor		4.92674e-07		5.13271e-07	-2.05974e-08	-4.18074
SN1063659702	AZ12608964-001	CHEMBL296323 (Compound 5, R-3)	androgen receptor antagonist		1.90795e-05		1.90152e-05	6.43486e-08	0.337265
SN1071862212	AZ12708438-002	CHEMBL2151322 (compound 3a)	TRKA inhibitor		1.54768e-06		1.50914e-06	3.85396e-08	2.49015
SN1074457389	AZ12823764-001	CHEMBL1762547 (Compound 29)	EphB4 inhibitor		2.32222e-05		2.25476e-05	6.74601e-07	2.90499
SN1053898371	AZ12432102-001	A-674563	AKT inhibitor		2.64333e-06		2.50792e-06	1.35418e-07	5.123
SN1059862183	AZ13936368-001	SCHEMBL16703498	GSK3 inhibitor		6.29644e-08		5.8278e-08	4.68638e-09	7.44291
SN1056971276	AZ12488792-001	SCHEMBL1448071	CDK inhibitor		4.47992e-07		4.13237e-07	3.47549e-08	7.75792
SN1064810981	AZ12631672-001	SCHEMBL2921921	CDK inhibitor		4.68654e-08		4.31965e-08	3.6689e-09	7.82858
SN1073025569	AZ12792629-001	SCHEMBL1168426	AXL kinase inhibitor		1.20704e-06		1.10697e-06	1.00076e-07	8.29102
SN1123197491	AZ13773220-001	ONX-0914	proteasome inhibitor		1.06857e-06		9.65386e-07	1.03187e-07	9.65652
SN1057293454	AZ12494595-001	SCHEMBL1447199	CDK inhibitor		1.46128e-07		1.28485e-07	1.76431e-08	12.0738
SN0046318497	AZ10172110-001	Acetyldigoxin	ATPase inhibitor		1.60698e-07		1.4107e-07	1.96274e-08	12.2138
SN1055754016	AZ13867064-001	SCHEMBL16710985	GSK3 inhibitor		6.79303e-08		5.87202e-08	9.21014e-09	13.5582
SN1060843667	AZ12552389-002	MK-0429	pan-integrin antagonist		8.99842e-07		7.50952e-07	1.4889e-07	16.5462
SN1046633507	AZ13731014-002	CHEMBL3656841;Novartis - NVP2	CDK9 inhibitor		5.65869e-09		4.55113e-09	1.10756e-09	19.5728
SN0185717327	AZ10416130-001	BMS-387032	CDK inhibitor|cell cycle inhibitor|MCL1 inhibitor		1.78559e-07		1.42724e-07	3.58348e-08	20.0689
SN1060629797	AZ12557025-001	SCHEMBL4247391	CDK inhibitor		1.18991e-06		9.50112e-07	2.39796e-07	20.1525
SN1110326954	AZ13719273-001	SCHEMBL1840041	CDK inhibitor		5.98275e-07		4.61544e-07	1.36731e-07	22.8542
SN0199179571	AZ11944844-001	Digitoxigenin	ATPase inhibitor		8.46475e-07		6.42113e-07	2.04362e-07	24.1427
SN1071249986	AZ12609865-005	SCHEMBL3027748	TRK inhibitor		1.8098e-07		1.37231e-07	4.37486e-08	24.1732
SN1086862772	AZ13057592-001	CHEMBL3125728 (Compound 18)	TBK1/IKK epsilon inhibitor		1.38706e-07		1.0409e-07	3.46166e-08	24.9568
SN1140243734	AZ14106025-001	BLU9931	FGFR inhibitor		2.16465e-05		1.6149e-05	5.49748e-06	25.3966
SN1070008356	AZ12732697-001	AT7519	CDK inhibitor		2.88364e-07		2.15124e-07	7.32399e-08	25.3984
SN1014828203	AZ12600034-002	CHEMBL2151319 (Compound 2a)	TRKA inhibitor		2.35376e-07		1.73777e-07	6.15986e-08	26.1703
SN1060124720	AZ14027223-001	THZ531	CDK inhibitor		3.26663e-07		2.2683e-07	9.98327e-08	30.5614
SN1059875955	AZ13948141-001	SCHEMBL16704218	GSK3 inhibitor		1.01564e-08		6.5425e-09	3.6139e-09	35.5825
SN0024162635	AZ10242722-002	Digoxin	ATPase inhibitor		1.11216e-07		7.12842e-08	3.99316e-08	35.9046
SN0031212809	AZ12163351-002	Anisomycin, (+)-	DNA synthesis inhibitor		3.66001e-07		2.16042e-07	1.4996e-07	40.9725
SN1071478279	AZ12409076-005	SCHEMBL3945135	GSK3 inhibitor		2.16108e-05		1.24149e-05	9.19582e-06	42.5521
SN0202861890	AZ11628429-001	SCHEMBL1926788	IKK2 inhibitor		6.39938e-06		3.61068e-06	2.78871e-06	43.5777
SN1106277088	AZ13632889-001	Anisomycin	JNK activator		7.34039e-07		3.46771e-07	3.87268e-07	52.7585
SN1089541426	AZ13134778-001	Proscillaridin A	topoisomerase inhibitor		4.63778e-08		2.16541e-08	2.47237e-08	53.3093
SN1039203637	AZ13728306-001	SCHEMBL12466071	CDK inhibitor		2.20927e-08		9.37474e-09	1.2718e-08	57.5664
SN1110326940	AZ13719272-001	Meriolin-3	CDK2/CDK9 inhibitor		1.35135e-06		1.81741e-07	1.16961e-06	86.5512
SN1151683253	AZ14132521-001	NS-018	JAK inhibitor		2.16918e-05		2.7524e-06	1.89394e-05	87.3114
SN0044558158	AZ10358917-001	CHEMBL1439938 (Compound 10); SCHEMBL10062876	MD2 inhibitor;		>3E-05		>3E-05	n/a	n/a
SN1044003383	AZ13587878-003	Bardoxolone methyl	NFKB pathway inhibitor|Nrf2 pathway activator		>3E-05		>3E-05	n/a	n/a
SN1070696486	AZ12746591-001	SCHEMBL3766926 (US8486966, 8)	TRK inhibitor		4.08351e-07		>3E-05	n/a	n/a
								0	#DIV/0!
