# Supplementary material for: Nuclear fascin regulates cancer cell survival
Source: eLife. 2022 Aug 30;11:e79283. doi: 10.7554/eLife.79283 (PMC9427113; doi:10.7554/eLife.79283)
Supplement: Figure 7—source data 2. [file elife-79283-fig7-data2.xlsx]

## Sheet: Compounds
		Key
		Nuclear fascin and F-actin hits
		Nuclear fascin only hits
		Nuclear F-actin only hits
		Inactive
				Nuclear fascin - compound response			Nuclear actin - compound response
SAMPLE_ID	AZID	Synonym	MoA	Curve	Data Mode	qAC50 [M]	Curve	Data Mode	qAC50 [M]
SN1055754016	AZ13867064	SCHEMBL16710985	GSK3 inhibitor		active	3.0062e-09		active	7.74128e-09
SN1046633507	AZ13731014	CHEMBL3656841;Novartis - NVP2	CDK9 inhibitor		active	2.02532e-08		active	3.64535e-09
SN1057798306	AZ12503983	-	-		active	2.64162e-08		active	2.69657e-08
SN1064810981	AZ12631672	SCHEMBL2921921	CDK inhibitor		active	3.40425e-08		active	3.61066e-08
SN1089541426	AZ13134778	Proscillaridin A	topoisomerase inhibitor		active	1.19426e-07		active	2.40813e-07
SN0185717327	AZ10416130	BMS-387032	CDK inhibitor|cell cycle inhibitor|MCL1 inhibitor		active	3.06474e-07		active	1.09713e-07
SN1110326954	AZ13719273	SCHEMBL1840041	CDK inhibitor		active	3.60333e-07		active	1.60848e-07
SN1060124720	AZ14027223	THZ531	CDK inhibitor		active	5.7628e-07		active	3.70382e-07
SN1056971276	AZ12488792	SCHEMBL1448071	CDK inhibitor		active	7.28913e-07		active	5.0639e-07
SN1059875955	AZ13948141	SCHEMBL16704218	GSK3 inhibitor		active	1.03358e-06		active	8.91348e-10
SN0188025193	AZ11568140	CHEMBL115933 (Compound 34)	CDK2 inhibitor		active	1.20874e-06		active	2.72105e-07
SN1151683253	AZ14132521	NS-018	JAK inhibitor		active	1.31999e-06		active	1.66703e-07
SN1070696486	AZ12746591	SCHEMBL3766926 (US8486966, 8)	TRK inhibitor		active	1.32552e-06		active	6.11095e-07
SN1060629797	AZ12557025	SCHEMBL4247391	CDK inhibitor		active	1.39205e-06		active	4.08843e-07
SN1048163792	AZ12278487	SCHEMBL3548645	CDK inhibitor		active	1.41284e-06		active	1.24008e-06
SN1071862212	AZ12708438	CHEMBL2151322 (compound 3a)	TRKA inhibitor		active	1.44905e-06		active	1.18608e-06
SN1109644646	AZ13718956	-	-		active	1.51166e-06		active	9.92721e-08
SN1140249037	AZ14106114	PP121	mTOR inhibitor|DNK-PK inhibitor|VEGFR2 inhibitor|SRC inhibitor|PDGFR inhibitor		active	1.67823e-06		active	2.36123e-06
SN0185717431	AZ10416131	SCHEMBL4730239	CDK2 inhibitor		active	1.89252e-06		active	2.43733e-07
SN0203289526	AZ11597970	SCHEMBL5096296	CDK inhibitor		active	1.94513e-06		active	3.79812e-07
SN1052454837	AZ13820385	Atuveciclib	CDK9 inhibitor		active	2.21315e-06		active	3.75927e-07
SN1045820098	AZ13719223	SCHEMBL14792925	CDK9 inhibitor		active	2.25711e-06		active	1.09323e-07
SN1014828203	AZ12600034	CHEMBL2151319 (Compound 2a)	TRKA inhibitor		active	2.41597e-06		active	2.80498e-07
SN1059744051	AZ12541869	SCHEMBL1447182	CDK inhibitor		active	2.60564e-06		active	2.58758e-07
SN1151669528	AZ14132192	CHR-6494	haspin inhibitor		active	2.66366e-06		active	6.49419e-07
SN1054380477	AZ10352596	Cerivastatin	HMGCR inhibitor		active	2.95645e-06		active	1.26008e-06
SN1127265894	AZ13846925	-	-		active	2.9617e-06		active	9.8143e-08
SN1123197491	AZ13773220	ONX-0914	proteasome inhibitor		active	3.04253e-06		active	7.7599e-06
SN1053219913	AZ12420121	SCHEMBL12861893	GSK3 inhibitor		active	3.08629e-06		active	1.8708e-07
SN1058312652	AZ13830072	Compound 5 (CJM, PDBe: 6B3E)	CDK12 inhibitor		active	3.2087e-06		active	2.53612e-06
SN1140242427	AZ14106051	Oprozomib	proteasome inhibitor		active	3.28574e-06		active	1.97633e-06
SN1061381036	AZ12570203	-	-		active	3.60061e-06		active	1.68343e-06
SN1051354848	AZ13774681	SCHEMBL16050822 (US9796708, Example 1053)	CDK9 inhibitor		active	4.07151e-06		active	1.48495e-07
SN1047164129	AZ13723372	SCHEMBL16209458	IRAK4 inhibitor		active	4.21623e-06		active	2.31238e-06
SN1109508827	AZ13715532	SCHEMBL2401133	CDK inhibitor|GSK3 inhibitor		active	7.15373e-06		active	3.53612e-07
SN1048276267	AZ13737674	SR-3029	CK1D/CK1E inhibitor		active	7.59254e-06		active	7.69588e-07
SN1122677980	AZ11341640	5-Iodotubercidin	adenosine kinase inhibitor		active	7.65285e-06		active	2.59195e-06
SN1060736397	AZ12558952	SCHEMBL1448376	CDK inhibitor		active	9.88721e-06		active	6.5313e-07
SN1060629401	AZ12557021	-	-		active	1.28016e-05		active	1.37126e-06
SN1060998317	AZ14103770	SCHEMBL16703845	GSK3 inhibitor		active	2.29348e-05		active	1.55462e-07
SN0202861890	AZ11628429	SCHEMBL1926788	IKK2 inhibitor		active	2.91506e-05		active	3.98111e-06
SN1048268586	AZ13737673	CHEMBL182419 (Compound 4)	GSK3 inhibitor		active	3e-05		active	9.14747e-07
SN1123576281	AZ13785299	CR8-(R)	CDK inhibitor		active	3e-05		active	2.30392e-06
SN1150832963	AZ14110887	selinexor	exportin antagonist		active	3.61635e-08		inactive
SN1039203637	AZ13728306	SCHEMBL12466071	CDK inhibitor		active	8.97124e-08		inactive
SN1059632852	AZ13927174	SCHEMBL16702398	GSK3 inhibitor		active	9.84907e-08		inactive
SN1057293454	AZ12494595	SCHEMBL1447199	CDK inhibitor		active	1.73735e-07		inactive
SN0024162635	AZ10242722	Digoxin	ATPase inhibitor		active	2.77301e-07		inactive
SN1110326940	AZ13719272	Meriolin-3	CDK2/CDK9 inhibitor		active	2.9096e-07		inactive
SN1055632718	AZ12464316	SCHEMBL3540056	CDK inhibitor		active	4.37097e-07		inactive
SN1071478279	AZ12409076	SCHEMBL3945135	GSK3 inhibitor		active	4.91647e-07		inactive
SN1060843667	AZ12552389	MK-0429	pan-integrin antagonist		active	5.40533e-07		inactive
SN1070008356	AZ12732697	AT7519	CDK inhibitor		active	6.09387e-07		inactive
SN1074457389	AZ12823764	CHEMBL1762547 (Compound 29)	EphB4 inhibitor		active	7.17083e-07		inactive
SN0044558158	AZ10358917	CHEMBL1439938 (Compound 10); SCHEMBL10062876	MD2 inhibitor		active	1.00534e-06		inactive
SN0046318497	AZ10172110	Acetyldigoxin	ATPase inhibitor		active	1.1021e-06		inactive
SN1060433305	AZ14115914	b-AP15	UCHL5/Usp14 inhibitor		active	1.35663e-06		inactive
SN0199179571	AZ11944844	Digitoxigenin	ATPase inhibitor		active	1.36777e-06		inactive
SN1062996041	AZ14119711	PF-06263276	pan-JAK inhibitor		active	1.5661e-06		inactive
SN1063221398	AZ12601495	SCHEMBL3217699	CDK inhibitor		active	1.79565e-06		inactive
SN1061247596	AZ14105696	KPT-276	exportin antagonist		active	1.852e-06		inactive
SN1065787583	AZ12646625	SCHEMBL4504912	CDK inhibitor		active	1.96945e-06		inactive
SN1062972369	AZ12597013	SCHEMBL1448447	CDK inhibitor		active	2.02418e-06		inactive
SN0188379251	AZ10200049	AG-12286	CDK inhibitor		active	2.05567e-06		inactive
SN1140243734	AZ14106025	BLU9931	FGFR inhibitor		active	2.15635e-06		inactive
SN1109368592	AZ13711674	SCHEMBL2380875	CDK inhibitor|GSK3 inhibitor		active	2.17766e-06		inactive
SN1044003383	AZ13587878	Bardoxolone methyl	NFKB pathway inhibitor|Nrf2 pathway activator		active	2.19228e-06		inactive
SN0154359961	AZ10554701	Bisindolylmaleimide-IX	PKC inhibitor		active	2.28239e-06		inactive
SN0031212809	AZ12163351	Anisomycin, (+)-	DNA synthesis inhibitor		active	2.45569e-06		inactive
SN1057361452	AZ13838456	CHEMBL4207173	-		active	2.51251e-06		inactive
SN1071249986	AZ12609865	SCHEMBL3027748	TRK inhibitor		active	2.58567e-06		inactive
SN1106277088	AZ13632889	Anisomycin	JNK activator		active	2.7566e-06		inactive
SN0178629597	AZ10036187	CHEMBL73303 (Compound 1a)	CDK2 inhibitor		active	2.89235e-06		inactive
SN1057031606	AZ12444557	SCHEMBL2485537	TRK inhibitor		active	3.07572e-06		inactive
SN0206299846	AZ11705713	-	-		active	3.79998e-06		inactive
SN1109632629	AZ13718602	SCHEMBL2370461	CDK inhibitor|GSK3 inhibitor		active	3.8476e-06		inactive
SN1045614781	AZ12170098	CHEMBL514257 (Compound 10l)	TRK inhibitor		active	3.86993e-06		inactive
SN1053841386	AZ12411065	SCHEMBL13878979	GSK3 inhibitor		active	3.98316e-06		inactive
SN1056734396	AZ12484281	SCHEMBL1447669	CDK inhibitor		active	4.89747e-06		inactive
SN1063659702	AZ12608964	CHEMBL296323 (Compound 5, R-3)	androgen receptor antagonist		active	6.42912e-06		inactive
SN1073025569	AZ12792629	SCHEMBL1168426	AXL kinase inhibitor		active	7.21302e-06		inactive
SN1057353095	AZ12496669	Digoxigenin	steroid		active	7.33014e-06		inactive
SN1061311185	AZ12504625	R547	CDK inhibitor		active	8.4347e-06		inactive
SN1110327072	AZ13719297	SCHEMBL2370948	CDK inhibitor|GSK3 inhibitor		active	8.47145e-06		inactive
SN1053898371	AZ12432102	A-674563	AKT inhibitor		active	8.94034e-06		inactive
SN1086862772	AZ13057592	CHEMBL3125728 (Compound 18)	TBK1/IKK epsilon inhibitor		active	9.05339e-06		inactive
SN1066041816	AZ12502704	CHEMBL460102 (Compound (S)-8b)	CDK2 inhibitor		active	9.20317e-06		inactive
SN1036121508	AZ13508033	GSK923295	centromere associated protein inhibitor		active	1e-05		inactive
SN1151683786	AZ14132531	AT-9311, LCQ-195, NVP-LCQ195	CDK1 inhibitor|CDK2 inhibitor		active	1.18499e-05		inactive
SN1052454823	AZ13820386	Atuveciclib	CDK9 inhibitor		active	1.35589e-05		inactive
SN1051480580	AZ13806063	SCHEMBL18338401	CDK9 inhibitor		active	1.39099e-05		inactive
SN1051013858	AZ12379297	CHEMBL487067 (Compound 7e)	CDK2 inhibitor		active	1.78098e-05		inactive
SN0150182995	AZ10522304	CHEMBL16861 (Compound 10)	tankyrase inhibitor		active	3e-05		inactive
SN1021295572	AZ10206039	-	-		active	3e-05		inactive
SN1093820887	AZ13256101	CHEMBL456390 (Compound 3)	CYP11B2 inhibitor		active	3e-05		inactive
SN1123523797	AZ12631956	gestodene	contraceptive agent		active	3e-05		inactive
SN1140235935	AZ14105977	Epothilone-B	microtubule stabilizing agent|tubulin polymerization inhibitor		inactive			active	1.3859e-09
SN1060338315	AZ12551521	SCHEMBL1447608	CDK inhibitor		inactive			active	1.59422e-08
SN1078379622	AZ12580005	AZD5597	CDK2 inhibitor		inactive			active	4.13593e-08
SN1048578444	AZ12336097	SCHEMBL3551425	CDK inhibitor		inactive			active	4.27419e-08
SN1123537305	AZ13783749	A-1070722	glycogen synthase kinase inhibitor		inactive			active	1.65683e-07
SN1056244289	AZ13850954	CHEMBL54547 (Compound 9)	GSK3 inhibitor		inactive			active	1.71824e-07
SN1030055446	AZ11550108	SCHEMBL6370581	JNK inhibitor		inactive			active	3.1975e-07
SN1019106211	AZ13225218	SCHEMBL4325907	ALK1 inhibitor		inactive			active	3.35193e-07
SN1060811386	AZ12560255	112866482	-		inactive			active	3.4832e-07
SN1059862183	AZ13936368	SCHEMBL16703498	GSK3 inhibitor		inactive			active	4.09912e-07
SN1066059773	AZ12651953	SCHEMBL3777718 (US8486966, 1)	TRK inhibitor		inactive			active	4.46965e-07
SN1070379479	AZ12740033	SCHEMBL3781802 (US8486966, 10)	TRK inhibitor		inactive			active	4.94312e-07
SN1068383166	AZ12698598	-	-		inactive			active	5.65906e-07
SN1151663437	AZ14132093	litronesib	kinesin-like spindle protein inhibitor		inactive			active	6.54228e-07
SN1045820471	AZ13719533	BAY-958	PTEFb/CDK9 inhibitor		inactive			active	7.19432e-07
SN1013345304	AZ11125804	SCHEMBL3332447 (AZD); AZD2858 Analogue (not restricted)	GSK3 inhibitor		inactive			active	8.90355e-07
SN1033366939	AZ11695243	SCHEMBL6034977	GSK3 inhibitor		inactive			active	1.00332e-06
SN0032100754	AZ10011760	NSC-23180 (Compound 52)	CD45 inhibitor		inactive			active	1.34172e-06
SN1063390956	AZ12604484	-	-		inactive			active	1.48994e-06
SN1076287848	AZ12609721	CHEMBL1762530 (Compound 12)	EphB4 inhibitor		inactive			active	1.64436e-06
SN1031657377	AZ13344324	CHEMBL3746463 (Compound 30)	JAK1 inhibitor		inactive			active	1.68227e-06
SN1044754064	AZ12237560	CHEMBL244286 (Compound 18)	TIE-2 inhibitor|VEGFR-2 inhibitor		inactive			active	1.89482e-06
SN1090604501	AZ13164099	SCHEMBL5314379	Caspase activator		inactive			active	1.97524e-06
SN1094657674	AZ13284866	IKK-16	IKK inhibitor		inactive			active	2.10631e-06
SN1004133774	AZ10556898	Celastrol (Tripterin)	proteasome inhibitor		inactive			active	2.39793e-06
SN1062915191	AZ12595980	SCHEMBL3011834	TRK inhibitor		inactive			active	2.82028e-06
SN1074976353	AZ12834824	CHEMBL2381980 (Compound 6)	JAK2 inhibitor		inactive			active	2.98582e-06
SN1122300289	AZ13744991	CHIR-98014 (CT-98014)	GSK3A/B inhibitor		inactive			active	3.07402e-06
SN1059386327	AZ12489898	SCHEMBL2569557	TRK inhibitor		inactive			active	3.125e-06
SN1070786719	AZ12748102	CHEMBL1762545 (Compound 27)	EphB4 inhibitor		inactive			active	3.125e-06
SN1107818037	AZ13677012	CHEMBL2181732 (Compound 13a)	BET bromodomian inhibitor		inactive			active	3.49397e-06
SN1106713132	AZ13646290	CHEMBL2152252 (Compound 31)	PI3K inhibitor		inactive			active	3.56658e-06
SN0067606367	AZ10319505	989142	-		inactive			active	3.98466e-06
SN1031081102	AZ11575492	SCHEMBL4839100	ITK inhibitor		inactive			active	4.54581e-06
SN1058171788	AZ12511014	SCHEMBL14027921	GSK3 inhibitor		inactive			active	5.22143e-06
SN1051354531	AZ12253801	AZ12253801	IGF1R inhibitor		inactive			active	6.63987e-06
SN1094658344	AZ13284880	NSC-632839	ubiquitin specific protease inhibitor		inactive			active	1.2099e-05
SN1003959720	AZ11939564	estradiol-benzoate	contraceptive agent		inactive			active	1.40149e-05
SN1078998854	AZ12487957	CHEMBL500724 (Compound 5)	EphB4 inhibitor		inactive			active	1.42985e-05
SN1106932555	AZ13650788	SCHEMBL3431479	PI3K inhibitor		inactive			active	1.62234e-05
SN1074216650	AZ12818485	CHEMBL2381975 (Compound 14)	JAK2 inhibitor		inactive			active	1.65486e-05
SN1099046264	AZ10849009	Fluvastatin (stereoisomer)	HMG-CoA reductase inhibitor		inactive			active	1.72373e-05
SN1140242309	AZ14105996	CYT-997 (Lexibulin)	tubulin polymerization inhibitor		inactive			active	1.82824e-05
SN0022071220	AZ11697675	15984070	-		inactive			active	1.95159e-05
SN1037788046	AZ12128775	Desoxycortone	mineralocorticoid receptor agonist		inactive			active	2.59953e-05
SN1026458176	AZ13374138	CHEMBL1934426 (Compound 22)	FPR1 antagonist		inactive			active	3e-05
SN1059806504	AZ11796684	71350926	-		inactive			active	3e-05
SN0014898626	AZ10045227	CHEMBL56906 (Compound 25)	GABA A receptor agonist		inactive			inactive
SN0016444713	AZ10110866	Flubendazole	tubulin polymerization inhibitor		inactive			inactive
SN0024072822	AZ10115990	CHEMBL65700 (Compound 6)	phosphodiesterase inhibitor		inactive			inactive
SN0027171634	AZ10235797	Cambendazole	anthelmintic agent		inactive			inactive
SN0028003533	AZ10229727	Acetyl-L-carnitine	metabolite		inactive			inactive
SN0028495382	AZ10547521	SCHEMBL18825201	-		inactive			inactive
SN0029948641	AZ10117935	Parbendazole	tubulin polymerization inhibitor		inactive			inactive
SN0032693395	AZ10488549	deoxycorticosterone-acetate	progestogen hormone		inactive			inactive
SN0036444631	AZ12122821	desoxycortone	mineralocorticoid receptor agonist		inactive			inactive
SN0036955706	AZ10065157	SCHEMBL7957683 (Compound 6h)	glutamate receptor antagonist		inactive			inactive
SN0039332470	AZ10291917	CHEMBL50846 (Compound 67)	CD45 inhibitor		inactive			inactive
SN0046345475	AZ11870287	-	-		inactive			inactive
SN0054406580	AZ10142113	CHEMBL284028 (Compound 6k)	glutamate receptor antagonist		inactive			inactive
SN0067351101	AZ10303525	2824480	-		inactive			inactive
SN0127491906	AZ10044858	CHEMBL444884 (Compound 8)	IKK inhibitor		inactive			inactive
SN0150301362	AZ10005941	Oxibendazole	tubulin polymerization inhibitor		inactive			inactive
SN0151880263	AZ10544727	SCHEMBL3266075	antiviral agent		inactive			inactive
SN0153029999	AZ10582311	K-858	kinesin-like spindle protein inhibitor		inactive			inactive
SN0153942577	AZ10320548	Thioguanine	purine antagonist		inactive			inactive
SN0154370449	AZ10292967	6-Hydroxyflavone	GABA A receptor modulator		inactive			inactive
SN0206732455	AZ11765661	CHEMBL2031236 (Compound 19)	p38 MAPK inhibitor		inactive			inactive
SN0213315970	AZ12077490	CHEMBL449600 (Compound 6f)	CDC7 inhibitor;Cdc7 inhibitor		inactive			inactive
SN0215698249	AZ12000003	3100910	-		inactive			inactive
SN0215923065	AZ10202485	lobendazole	anthelmintic agent		inactive			inactive
SN1000498953	AZ12598921	CHEMBL1271394 (Compound 19)	EphB4 inhibitor		inactive			inactive
SN1006003539	AZ10930497	CHEMBL53856 (Compound 12)	PKC inhibitor		inactive			inactive
SN1009036474	AZ12971271	SCHEMBL3938958	mTOR inhibitor|PI3K inhibitor		inactive			inactive
SN1014015879	AZ13099966	SCHEMBL6156169	CDK inhibitor		inactive			inactive
SN1022318062	AZ10705652	MS-7972	p53/CREB binding inhibitor		inactive			inactive
SN1024729428	AZ10218034	CHEMBL217366 (Compound 2)	alpha2C-adrenoceptor antagonist		inactive			inactive
SN1026103565	AZ11229719	675997	-		inactive			inactive
SN1031011949	AZ11568876	SCHEMBL6791191	matrix metalloprotease inhibitor		inactive			inactive
SN1037110060	AZ11125399	AZD2858	GSK3 inhibitor		inactive			inactive
SN1037828665	AZ12504248	D-64131	microtubule inhibitor		inactive			inactive
SN1044109326	AZ12260002	SCHEMBL3867651	Eg5 inhibitor		inactive			inactive
SN1044800788	AZ10353479	SB-218078	CHK inhibitor		inactive			inactive
SN1047339344	AZ13725741	SCHEMBL10195628	IRAK inhibitor		inactive			inactive
SN1047483929	AZ13762574	SCHEMBL16039936 (US9073922, 88)	CDK9 inhibitor		inactive			inactive
SN1047900893	AZ13756443	SCHEMBL16041546 (US9073922, 29)	CDK9 inhibitor		inactive			inactive
SN1048132116	AZ13735617	SR-2890	CK1D/CK1E inhibitor		inactive			inactive
SN1048155087	AZ12191950	CHEMBL220346 (Compound 6a)	beta-secretase inhibitor		inactive			inactive
SN1048281424	AZ13232525	PHA-767491	CDC inhibitor		inactive			inactive
SN1048744455	AZ13733920	deltarasin	phosphodiesterase inhibitor		inactive			inactive
SN1051816269	AZ12396542	SCHEMBL346727	chemokine receptor modulator		inactive			inactive
SN1054559963	AZ13807586	SCHEMBL16046860	CSF1R inhibitor|cKit inhibitor|c-FMS inhibitor|PDGFR inhibitor		inactive			inactive
SN1056224557	AZ12367841	SCHEMBL4926567 (AZD3646)	AuroraB inhibitor		inactive			inactive
SN1057733612	AZ11889318	Equilin	estrogen receptor agonist		inactive			inactive
SN1057822873	AZ12504374	2-Methoxyestradiol	hypoxia inducible factor inhibitor		inactive			inactive
SN1058514991	AZ13861328	CHEMBL3410091 (Compound 5)	GSK3 inhibitor		inactive			inactive
SN1058539184	AZ12518215	SCHEMBL4899947	IKK inhibitor		inactive			inactive
SN1059521883	AZ13926271	CHEMBL3337851 (Compound 7)	CK1D inhibitor|CK1E inhibitor		inactive			inactive
SN1060324024	AZ12443672	CHEMBL256725 (Compound 7)	EphB4 inhibitor		inactive			inactive
SN1060398343	AZ12552658	SCHEMBL13730329	Pf dihydroorotate dehydrogenase inhibitor		inactive			inactive
SN1062297445	AZ12585887	CHEMBL1288009 (Compound 32)	CHK inhibitor		inactive			inactive
SN1062773446	AZ12572522	SCHEMBL3939418	FGFR inhibitor		inactive			inactive
SN1063079743	AZ12598922	-	-		inactive			inactive
SN1063767769	AZ12610919	CHEMBL1258581 (Compound 4d)	Bcr-Abl kinase inhibitor		inactive			inactive
SN1064525585	AZ12625435	CHEMBL252585 (Compound 5G)	phosphodiesterase inhibitor4 inhibitor		inactive			inactive
SN1065185152	AZ12637533	Indirubin-3'-monoxime	CDK inhibitor|glycogen synthase kinase inhibitor		inactive			inactive
SN1065407590	AZ12206155	SCHEMBL852351	PARP inhibitor		inactive			inactive
SN1066599784	AZ12384652	Dasatinib	Bcr-Abl kinase inhibitor|ephrin inhibitor|KIT inhibitor|PDGFR tyrosine kinase receptor inhibitor|SRC inhibitor|tyrosine kinase inhibitor		inactive			inactive
SN1071249840	AZ12757574	SCHEMBL3022623	TRK inhibitor		inactive			inactive
SN1073730590	AZ12807581	CHEMBL1270378 (Compound 20)	EphB4 inhibitor		inactive			inactive
SN1074217334	AZ12818497	SCHEMBL4980597	aspartic protease inhibitor		inactive			inactive
SN1076054535	AZ12773966	SCHEMBL3927526	mTOR inhibitor|PI3K inhibitor		inactive			inactive
SN1077557362	AZ12672857	CHEMBL1269858 (Compound 20)	EphB4 inhibitor		inactive			inactive
SN1077907971	AZ12893858	SCHEMBL4083775	cysteine proteaseinhibitor		inactive			inactive
SN1080096182	AZ12933457	Buparlisib	PI3K inhibitor		inactive			inactive
SN1081710780	AZ12975455	SCHEMBL1248064	gamma secretase modulator		inactive			inactive
SN1087491827	AZ13072816	SCHEMBL737809 (AZD); AZD8431 Analogue (not restricted)	mTOR inhibitor|PI3K inibitor		inactive			inactive
SN1089190520	AZ12632319	estradiol-cypionate	estrogen receptor agonist		inactive			inactive
SN1094624638	AZ13283479	2149513	-		inactive			inactive
SN1094656235	AZ13284837	BVT-948	tyrosine phosphatase inhibitor		inactive			inactive
SN1105187427	AZ13595069	-	-		inactive			inactive
SN1105853052	AZ10136394	norgestrel	progesterone receptor agonist		inactive			inactive
SN1107710470	AZ13674217	CHEMBL4461363 (Compound 48)	JNK3 inhibitor		inactive			inactive
SN1108701882	AZ13697640	WS3	beta cell proliferation inducer		inactive			inactive
SN1122311641	AZ13745142	TG-100713	PI3K inhibitor		inactive			inactive
SN1123521943	AZ13783543	Medrogestone	progesterone receptor agonist		inactive			inactive
SN1123528166	AZ10292400	6,4'-Dihydroxyflavone (Compound 20)	PPAR receptor agonist		inactive			inactive
SN1123530275	AZ13783628	789831	-		inactive			inactive
SN1123533842	AZ13783689	CHEMBL270875 (Compound 7a)	calcium/calmodulin dependent protein kinase inhibitor		inactive			inactive
SN1123536352	AZ13783923	CHEMBL1510899 (docetaxel stereoisomer)	tubulin polymerization inhibitor		inactive			inactive
SN1140237643	AZ14105993	Cilengitide	integrin antagonist		inactive			inactive
SN1140238681	AZ14105926	Filanesib	kinesin inhibitor|kinesin-like spindle protein inhibitor		inactive			inactive
SN1151667669	AZ14132158	cevipabulin	microtubule stimulant|tubulin polymerization inhibitor		inactive			inactive
SN1151681677	AZ14132488	4SC-202	HDAC inhibitor		inactive			inactive
SN1151682050	AZ14132495	DB07545	Aurora kinase inhibitor		inactive			inactive
